# Supplementary material for: High-resolution mapping of transcriptional dynamics across tissue development reveals a stable mRNA–tRNA interface
Source: HighWire-hosted journal article supplement (doi:10.1101/gr.176784.114), 2014-08-13
Supplement: SUPP_table_2_protein-coding_genes_brain_140219.xlsx [file SUPP_table_2_protein-coding_genes_brain_140219.xlsx]

## Sheet: Sheet1
	brain-e15.5	brain-e18.5	brain-P0.5	brain-P4	brain-P22	brain-P29	Name	lname	Chr	Start	End
ENSMUSG00000091539	0	0	0	0	0	0	NA	vomeronasal 1 receptor, 238	18	3122455	3123465
ENSMUSG00000063889	117.345	137.358	114.713	105.599	269.671	289.314	NA	cAMP responsive element modulator	18	3266046	3337746
ENSMUSG00000024231	896.008	1065.55	1029.77	1070.19	1030.11	1047.01	NA	cullin 2	18	3382986	3436698
ENSMUSG00000024232	91.3093	77.2086	77.9507	94.2448	83.6623	82.1354	NA	BMP and activin membrane-bound inhibitor, homolog (Xenopus laevis)	18	3507955	3516402
ENSMUSG00000024233	0	0	0	0	0	0	NA	lysozyme-like 1	18	4165830	4182230
ENSMUSG00000024235	20.3627	18.532	14.7228	21.6762	33.89	45.3904	NA	mitogen-activated protein kinase kinase kinase 8	18	4331325	4353013
ENSMUSG00000024234	320.758	307.171	328.484	299.537	345.378	346.862	NA	mitochondrial poly(A) polymerase	18	4375590	4397328
ENSMUSG00000033960	402.295	458.594	346.146	537.466	1408.68	1702.5	NA	RIKEN cDNA 9430020K01 gene	18	4634927	4682866
ENSMUSG00000024236	360.685	242.88	219.281	293.154	230.107	208.477	NA	supervillin	18	4920538	5119297
ENSMUSG00000050945	57.745	60.3321	61.4605	78.5232	53.7961	54.406	NA	zinc finger protein 438	18	5210029	5334437
ENSMUSG00000063087	11.4285	13.815	12.5781	16.8876	16.3181	17.2521	NA	NA	18	5491501	5592437
ENSMUSG00000024238	0	0.355313	0.538156	0	0.409102	0	NA	zinc finger E-box binding homeobox 1	18	5591858	5775465
ENSMUSG00000093585	38.7515	29.0838	25.325	29.4855	25.3183	21.0806	NA	NA	18	5591870	5775741
ENSMUSG00000041225	1584.69	1541.59	1504.38	1352.74	1187.58	1224.92	NA	Rho GTPase activating protein 12	18	6024446	6136096
ENSMUSG00000006740	3904.99	3734.89	3693.56	4021.89	7993.43	8345.16	NA	kinesin family member 5B	18	6201000	6242172
ENSMUSG00000073640	42.0535	71.4814	41.5817	47.8735	27.277	35.8824	NA	ribosomal protein L27	18	6332588	6333062
ENSMUSG00000024240	1211.34	1064.73	1160.71	790.995	609.678	577.529	NA	enhancer of polycomb homolog 1 (Drosophila)	18	6435949	6516106
ENSMUSG00000039540	0	0	0	0	0	0	NA	RIKEN cDNA 4921524L21 gene	18	6603627	6638964
ENSMUSG00000073639	872.505	798.675	875.221	972.857	1191.76	1140.87	NA	RAB18, member RAS oncogene family	18	6765198	6790320
ENSMUSG00000061013	15.0501	36.0403	34.4248	67.0188	139.189	143.85	NA	mohawk homeobox	18	6934998	7004724
ENSMUSG00000061802	11.8712	6.56849	12.4818	15.2516	22.5821	16.3061	NA	armadillo repeat containing 4	18	7088231	7297899
ENSMUSG00000057440	274.329	220.509	221.314	217.646	379.342	275.428	NA	membrane protein, palmitoylated 7 (MAGUK p55 subfamily member 7)	18	7347960	7626861
ENSMUSG00000024283	1437	1344.35	1465.44	1350.8	1246.89	1220.89	NA	WW domain containing adaptor with coiled-coil	18	7868830	7973545
ENSMUSG00000092097	0.764492	2.02432	0.449781	1.13343	0.31524	1.78531	NA	NA	18	8694075	8694539
ENSMUSG00000036904	300.044	177.555	151.604	126.147	79.6846	76.7544	NA	frizzled homolog 8 (Drosophila)	18	9212854	9216199
ENSMUSG00000036855	0	2.16453	0.449781	0.37781	0	0.645494	NA	gap junction protein, delta 4	18	9278605	9282807
ENSMUSG00000024286	1353.04	1339.23	1440.03	1643.6	2594.72	2319.13	NA	cyclin Y	18	9314042	9450148
ENSMUSG00000050996	0	0	0	0	0	0	NA	centrin 1	18	9615522	9619476
ENSMUSG00000036103	490.957	270.706	165.435	269.229	316.45	335.167	NA	collectin sub-family member 12	18	9707646	9877993
ENSMUSG00000091285	0	0	0	0	0	0	NA	NA	18	9726195	9726668
ENSMUSG00000092039	0	0	0	0	0	0	NA	NA	18	9916893	9917753
ENSMUSG00000024287	711.103	657.387	660.566	508.584	391.709	392.505	NA	THO complex 1	18	9958178	9995482
ENSMUSG00000047879	962.212	1181.94	1306.86	1447.65	1921.29	1912.92	NA	ubiquitin specific peptidase 14	18	9995430	10045117
ENSMUSG00000024290	1250.65	1081.13	959.714	846.224	879.822	796.971	NA	Rho-associated coiled-coil containing protein kinase 1	18	10064399	10181790
ENSMUSG00000042942	130.182	184.231	219.418	192.676	100.926	124.552	NA	growth regulation by estrogen in breast cancer-like	18	10325175	10562932
ENSMUSG00000071868	0	0.355313	0	0.37781	0.409102	0	NA	NA	18	10482680	10483544
ENSMUSG00000024293	571.831	595.497	597.186	535.293	864.161	894.716	NA	establishment of cohesion 1 homolog 1 (S. cerevisiae)	18	10566510	10610350
ENSMUSG00000002477	528.158	441.454	412.232	357.91	266.478	261.327	NA	small nuclear ribonucleoprotein D1	18	10617794	10628228
ENSMUSG00000002475	23.9843	53.7541	97.1634	305.87	988.26	991.601	NA	abhydrolase domain containing 3	18	10644409	10706769
ENSMUSG00000024294	3554.81	3154.9	3590.52	4315.48	7494.73	7049.67	NA	mindbomb homolog 1 (Drosophila)	18	10725546	10818702
ENSMUSG00000005836	6.15697	6.60115	2.87544	4.66389	1.85778	1.31232	NA	GATA binding protein 6	18	11052508	11085633
ENSMUSG00000041238	324.784	175.325	190.953	219.286	107.21	121.329	NA	retinoblastoma binding protein 8	18	11791785	11901716
ENSMUSG00000040957	128.856	178.331	196.607	184.343	380.61	345.996	NA	CDK5 and Abl enzyme substrate 1	18	11997729	12104136
ENSMUSG00000049411	106.159	91.3885	112.159	104.344	142.462	130.988	NA	transmembrane protein 241	18	12139812	12279989
ENSMUSG00000024404	1417.11	1335.96	1455.12	1160.88	1290.83	1098.65	NA	RIO kinase 3 (yeast)	18	12287359	12315876
ENSMUSG00000024410	280.642	329.631	289.014	300.775	341.845	331.587	NA	RIKEN cDNA 3110002H16 gene	18	12327226	12348506
ENSMUSG00000024413	685.676	705.942	732.245	662.205	990.049	1029.11	NA	Niemann Pick type C1	18	12348202	12394909
ENSMUSG00000057766	93.6805	149.739	127.548	234.543	269.986	257.589	NA	ankyrin repeat domain 29	18	12410871	12464229
ENSMUSG00000024421	61.8526	113.001	99.3318	115.934	88.189	94.8032	NA	laminin, alpha 3	18	12492533	12741522
ENSMUSG00000090309	0	0	0	0	0	0.215165	NA	NA	18	12657194	12657637
ENSMUSG00000024424	203.02	223.375	237.908	251.264	493.964	428.976	NA	tetratricopeptide repeat domain 39C	18	12758435	12895559
ENSMUSG00000024430	5.59331	12.4264	16.3531	10.7107	22.1057	14.1118	NA	calcium-binding tyrosine-(Y)-phosphorylation regulated (fibrousheathin 2)	18	12899833	12913655
ENSMUSG00000044252	577.029	1185.09	1265.25	2032.22	5534.13	5137.41	NA	oxysterol binding protein-like 1A	18	12913823	13100350
ENSMUSG00000024423	515.175	925.239	1096.36	2081.72	7013.6	6083.31	NA	imprinted and ancient	18	13130761	13151457
ENSMUSG00000037346	0	0	0	0.37781	0.31524	0	NA	histamine receptor H4	18	13165499	13181391
ENSMUSG00000024420	1070.74	832.683	869.986	1168.9	492.765	405.54	NA	zinc finger protein 521	18	13845522	14131242
ENSMUSG00000055795	0.764492	2.37964	1.52609	0	0.31524	0	NA	NA	18	14582159	14583820
ENSMUSG00000053740	85.1113	121.725	96.1108	78.5142	95.0499	60.0643	NA	NA	18	14728622	14730186
ENSMUSG00000037013	684.987	446.671	404.385	521.661	506.651	459.842	NA	synovial sarcoma translocation, Chromosome 18	18	14782707	14841423
ENSMUSG00000036743	2.09263	3.83354	5.20481	8.31726	7.33728	8.36823	NA	proteasome (prosome, macropain) subunit, alpha type, 8	18	14864660	14920808
ENSMUSG00000054321	31.5493	35.7176	37.63	62.3822	97.6657	96.697	NA	TAF4B RNA polymerase II, TATA box binding protein (TBP)-associated factor	18	14941754	15058868
ENSMUSG00000036225	304.952	294.282	316.484	291.213	497.653	531.654	NA	potassium channel tetramerisation domain containing 1	18	15127194	15309955
ENSMUSG00000024411	72.3136	967.11	1196.9	6427.67	4781.53	5310.44	NA	aquaporin 4	18	15547903	15562193
ENSMUSG00000047161	7.16333	9.30344	7.9035	7.05729	23.6217	20.2858	NA	carbohydrate (N-acetylgalactosamine 4-0) sulfotransferase 9	18	15610433	15918666
ENSMUSG00000058064	28.9341	34.039	27.566	21.2912	18.8063	20.9312	NA	NA	18	15991296	15991878
ENSMUSG00000063628	0	0	0	0	0	0	NA	NA	18	16433157	16433453
ENSMUSG00000024304	4181.08	3210.07	3320.88	2369.31	1698.22	1649.25	NA	cadherin 2	18	16747386	16967755
ENSMUSG00000059898	6.2779	83.6042	74.1348	74.9529	41.7975	43.109	NA	desmocollin 3	18	20119431	20160598
ENSMUSG00000024331	18.7927	44.3008	69.7742	63.6367	22.274	20.7161	NA	desmocollin 2	18	20189134	20218055
ENSMUSG00000044322	0.764492	3.47823	4.04012	6.67767	3.40033	2.6673	NA	desmocollin 1	18	20243204	20273274
ENSMUSG00000034774	0	2.37964	1.43772	5.03807	13.6952	11.7237	NA	desmoglein 1 gamma	18	20405841	20443532
ENSMUSG00000069441	1.20721	1.77656	2.51403	8.56853	2.70964	1.95781	NA	desmoglein 1 alpha	18	20469312	20501851
ENSMUSG00000061928	0.442714	1.06594	3.50197	8.44017	1.85778	0.881989	NA	desmoglein 1 beta	18	20535230	20568697
ENSMUSG00000001804	0	0.355313	0	0	0	0	NA	desmoglein 4	18	20594676	20630322
ENSMUSG00000056632	0.764492	2.87516	2.51403	4.41081	1.67006	0	NA	desmoglein 3	18	20668805	20705360
ENSMUSG00000044393	9.01409	24.3898	16.8028	23.4387	25.2917	34.0312	NA	desmoglein 2	18	20716575	20763022
ENSMUSG00000061808	3796.82	4079.89	5042.12	1776.23	3702.23	3277.34	NA	transthyretin	18	20823751	20832825
ENSMUSG00000091449	46.3187	70.3789	49.782	39.9431	19.9061	20.0279	NA	NA	18	20841060	20841504
ENSMUSG00000056124	787.733	1286.49	1508.99	2215.93	1987.49	1879.92	NA	UDP-Gal:betaGlcNAc beta 1,4-galactosyltransferase, polypeptide 6	18	20843100	20904905
ENSMUSG00000033382	1010.59	1118.07	1017.77	1010.58	1477.96	1447.43	NA	trafficking protein particle complex 8	18	20975725	21054579
ENSMUSG00000033107	10.7849	8.34505	12.1204	12.7299	18.8665	28.0938	NA	ring finger protein 125	18	21103126	21142349
ENSMUSG00000024317	505.07	498.985	473.43	388.082	280.24	278.84	NA	ring finger protein 138	18	21159842	21186724
ENSMUSG00000024313	0	0	1.07631	0.37781	0	0	NA	meprin 1 beta	18	21229286	21258700
ENSMUSG00000042680	194.969	230.51	317.978	298.886	283.226	313.252	NA	family with sequence similarity 59, member A	18	21285702	21458639
ENSMUSG00000042514	30.9468	51.5665	85.6933	87.5816	28.6584	36.6772	NA	kelch-like 14 (Drosophila)	18	21708878	21813219
ENSMUSG00000024306	0.764492	0.710625	1.97587	1.0087	0	0.215165	NA	RIKEN cDNA 4921528I01 gene	18	21969398	22329897
ENSMUSG00000045215	993.036	1006.14	983.902	683.241	227.518	273.374	NA	additional sex combs like 3 (Drosophila)	18	22503384	22688728
ENSMUSG00000041923	1249.71	1283.06	1244.1	966.763	1579.52	1539.43	NA	nucleolar protein 4	18	22851656	23200154
ENSMUSG00000024302	435.572	871.992	896.201	1264.45	1790.18	1913.71	NA	dystrobrevin alpha	18	23573916	23818215
ENSMUSG00000024277	1635.22	2186.29	2437.72	2508.22	1259.59	1433.28	NA	microtubule-associated protein, RP/EB family, member 2	18	23910834	24052362
ENSMUSG00000024276	1738.59	1402.17	1293.84	984.403	1016.91	897.101	NA	zinc finger protein 397	18	24113189	24123172
ENSMUSG00000024274	33.1193	27.1575	24.9715	20.7922	18.4238	21.8986	NA	NA	18	24123319	24140056
ENSMUSG00000063281	290.306	275.039	260.879	234.745	231.911	272.691	NA	zinc finger protein 35	18	24148133	24163877
ENSMUSG00000051469	1248.05	970.209	946.74	986.609	1342.85	1159.96	NA	zinc finger protein 191	18	24168203	24179311
ENSMUSG00000047989	228.892	264.722	337.633	291.477	233.488	267.527	NA	INO80 complex subunit C	18	24263258	24280454
ENSMUSG00000000420	1038.51	926.816	957.109	1083.12	1426.14	1152.48	NA	UDP-N-acetyl-alpha-D-galactosamine:polypeptide N-acetylgalactosaminyltransferase 1	18	24363845	24445319
ENSMUSG00000024273	89.0115	114.259	94.6731	99.5559	74.7825	70.3672	NA	RIKEN cDNA 2700062C07 gene	18	24629362	24636266
ENSMUSG00000040446	829.128	770.557	671.151	814.775	1654.79	1734.79	NA	regulation of nuclear pre-mRNA domain containing 1A	18	24643463	24688705
ENSMUSG00000024270	1588.46	1510.89	1511.16	1274.57	569.432	539.347	NA	solute carrier family 39 (metal ion transporter), member 6	18	24738382	24762318
ENSMUSG00000024271	1588.06	1481.28	1467.49	1324.29	1414.04	1294.62	NA	elongator acetyltransferase complex subunit 2	18	24762462	24798008
ENSMUSG00000039616	3.42078	5.61011	3.59034	4.7868	7.90755	16.9516	NA	molybdenum cofactor sulfurase	18	24812192	24860057
ENSMUSG00000054745	0	0.603073	2.51403	1.13343	1.54254	2.86113	NA	NA	18	24867541	24867849
ENSMUSG00000034295	728.82	896.987	1001.62	1099.02	872.341	876.745	NA	formin homology 2 domain containing 3	18	24867946	25292001
ENSMUSG00000024269	682.762	695.845	711.328	742.002	561.087	552.271	NA	RIKEN cDNA 5730494M16 gene	18	25285724	25327508
ENSMUSG00000033632	333.437	328.836	364.29	324.762	206.868	229.001	NA	expressed sequence AW554918	18	25327500	25625822
ENSMUSG00000024268	2726.23	3344.05	3659.51	3566.47	3604.02	3605.3	NA	CUGBP, Elav-like family member 4	18	25636133	25912484
ENSMUSG00000033628	509.616	511.205	506.81	441.663	830.908	795.337	NA	phosphoinositide-3-kinase, class 3	18	30432401	30507780
ENSMUSG00000091785	0	0	0	0	0	0	NA	NA	18	30618737	30619213
ENSMUSG00000057455	233.319	500.239	577.236	704.261	991.222	898.995	NA	Ras-like without CAAX 2	18	31133143	31476944
ENSMUSG00000024261	2873.67	4447.85	4174.2	3064.7	3993.41	3328.56	NA	synaptotagmin IV	18	31597462	31607069
ENSMUSG00000024259	926.635	1068.68	1073.57	1265.3	1977.6	1731.64	NA	solute carrier family 25, member 46	18	31739822	31770183
ENSMUSG00000092124	8.73335	11.0704	11.9357	11.8405	29.7653	33.3431	NA	NA	18	31769166	31770405
ENSMUSG00000024260	281.761	289.328	356.859	283.573	105.46	146.926	NA	Sin3A associated protein	18	31794025	31882715
ENSMUSG00000041915	499.477	441.791	414.522	418.744	258.551	285.164	NA	AMME chromosomal region gene 1-like	18	31919534	31942381
ENSMUSG00000024258	338.635	323.548	312.677	326.629	247.243	198.624	NA	polymerase (RNA) II (DNA directed) polypeptide D	18	31948813	31956296
ENSMUSG00000024400	949.015	856.063	910.723	777.224	819.315	818.746	NA	WD repeat domain 33	18	31963711	32068641
ENSMUSG00000091561	0	0	0	0	0	0	NA	NA	18	31979516	31980067
ENSMUSG00000044982	88.1304	79.1023	77.8545	68.3006	99.2755	76.6923	NA	SFT2 domain containing 3	18	32068748	32071557
ENSMUSG00000024395	6.59968	22.7957	26.1361	70.6994	139.798	129.738	NA	LIM and senescent cell antigen like domains 2	18	32091161	32118273
ENSMUSG00000052229	82.6558	328.868	395.665	1643.18	1649.36	1146.78	NA	G protein-coupled receptor 17	18	32102651	32109290
ENSMUSG00000024388	0	0	1.61447	2.39522	1.44868	0.430329	NA	myosin VIIB	18	32118888	32196615
ENSMUSG00000024384	2031.83	1635.28	1504.28	1298.05	1039.91	874.241	NA	IWS1 homolog (S. cerevisiae)	18	32227388	32263985
ENSMUSG00000024386	3.29984	5.61011	4.8434	0.37781	0.630479	0.215165	NA	protein C	18	32282783	32299224
ENSMUSG00000024383	1165.48	1380.15	1387.26	1259	1052.62	1027.41	NA	mitogen-activated protein kinase kinase kinase 2	18	32322743	32396405
ENSMUSG00000024382	335.409	336.013	327.978	347.559	313.153	334.772	NA	excision repair cross-complementing rodent repair deficiency, complementation group 3	18	32399954	32429805
ENSMUSG00000024381	618.189	880.12	930.553	1120.98	1696.29	1653.25	NA	bridging integrator 1	18	32536871	32595390
ENSMUSG00000090523	47.5259	35.0492	20.3932	37.8155	18.739	18.5218	NA	glycophorin C	18	32687976	32719688
ENSMUSG00000024380	0	0	0	0	0	0	NA	NA	18	32689316	32689630
ENSMUSG00000024379	2.29347	0.355313	0	0	0	1.09715	NA	thymic stromal lymphopoietin	18	32975037	32979453
ENSMUSG00000038299	653.206	622.995	539.18	597.23	709.074	604.488	NA	WD repeat domain 36	18	32996879	33026074
ENSMUSG00000038128	764.945	1901.61	2473.32	4534.48	9200.02	7022.84	NA	calcium/calmodulin-dependent protein kinase IV	18	33098695	33355421
ENSMUSG00000024378	255.418	305.293	260.557	418.237	480.8	485.557	NA	StAR-related lipid transfer (START) domain containing 4	18	33359009	33373516
ENSMUSG00000042834	8483.11	9335.83	9070.53	7153.03	3132.45	1968.68	NA	DNA segment, human D4S114	18	33596673	33623683
ENSMUSG00000073610	3.1789	1.66901	2.96381	3.77991	1.89144	0.430329	NA	NA	18	33623817	33632102
ENSMUSG00000024376	262.495	216.526	253.529	245.508	46.5332	57.5018	NA	erythrocyte protein band 4.1-like 4a	18	33955981	34166860
ENSMUSG00000005871	7282.61	9042.59	10070.3	11416.5	9734.52	8195.31	NA	adenomatosis polyposis coli	18	34380578	34481843
ENSMUSG00000014504	276.858	234.979	261.761	272.845	269.296	220.369	NA	signal recognition particle 19	18	34490501	34496253
ENSMUSG00000005873	1644.03	2991.53	3521.47	4262	3370.09	3517.7	NA	receptor accessory protein 5	18	34504543	34533069
ENSMUSG00000014503	5.51341	10.4347	11.3092	16.7538	26.2977	24.6317	NA	polycystic kidney disease 2-like 2	18	34569077	34602445
ENSMUSG00000036501	1062.38	1230.81	1295.55	1480.33	1136.25	1218.46	NA	family with sequence similarity 13, member B	18	34602006	34666477
ENSMUSG00000012282	0	0	0.538156	0.504351	0	0	NA	wingless-related MMTV integration site 8A	18	34701967	34707927
ENSMUSG00000035984	30.1801	35.3296	36.923	35.7799	34.8693	52.016	NA	NME/NM23 family member 5	18	34722288	34738769
ENSMUSG00000049357	28.3294	15.3764	15.1884	10.2081	3.43398	6.88341	NA	RIKEN cDNA 4933408B17 gene	18	34739500	34757122
ENSMUSG00000003778	1686.17	1541.29	1656.24	1177.34	975.614	900.902	NA	bromodomain containing 8	18	34758269	34784255
ENSMUSG00000003779	406.599	156.774	120.64	209.099	26.6466	26.2232	NA	kinesin family member 20A	18	34784278	34792919
ENSMUSG00000024370	1451.88	1248.82	1184.08	973.17	770.912	746.122	NA	CDC23 cell division cycle 23	18	34790605	34811389
ENSMUSG00000024366	2.85713	4.75927	1.8875	0.882161	0	0.215165	NA	glial cell line derived neurotrophic factor family receptor alpha 3	18	34849557	34880041
ENSMUSG00000044201	124.102	36.4609	43.7423	71.0845	2.89737	6.36776	NA	cell division cycle 25C	18	34892651	34911187
ENSMUSG00000078240	0	0	0	0	0	0	NA	NA	18	34897021	34897665
ENSMUSG00000034300	328.734	326.475	368.603	388.61	376.787	425.622	NA	family with sequence similarity 53, member C	18	34918560	34933414
ENSMUSG00000038773	1233.64	1003.55	1191.88	876.438	756.097	830.454	NA	KDM3B lysine (K)-specific demethylase 3B	18	34936662	34999024
ENSMUSG00000038555	373.394	533.456	676.139	773.617	768.091	709.488	NA	receptor accessory protein 2	18	35000312	35007106
ENSMUSG00000038418	13.1583	30.29	36.8504	47.8862	424.678	671.819	NA	early growth response 1	18	35019477	35024638
ENSMUSG00000091428	0	0	0	0.37781	3.93695	3.76445	NA	NA	18	35024439	35024763
ENSMUSG00000024360	1731.22	1516.01	1612.97	1778.2	1988.18	1684.13	NA	eukaryotic translation termination factor 1	18	35062446	35091657
ENSMUSG00000024359	2745.27	2573.8	2905.98	3038.45	3644.86	3404.59	NA	heat shock protein 9	18	35097068	35114011
ENSMUSG00000090620	0	0	0.538156	0	0.31524	0	NA	NA	18	35129314	35130423
ENSMUSG00000037815	1288.73	769.37	664.775	891.025	1089.3	1087.89	NA	catenin (cadherin associated protein), alpha 1	18	35278542	35414427
ENSMUSG00000071862	561.966	871.642	934.616	1020.85	1668.4	1558.28	NA	leucine rich repeat transmembrane neuronal 2	18	35368665	35374678
ENSMUSG00000024357	125.999	157.064	183.957	239.302	445.017	408.69	NA	endoplasmic reticulum chaperone SIL1 homolog (S. cerevisiae)	18	35426054	35658579
ENSMUSG00000062742	0.764492	0	0.449781	0	0	0.45166	NA	NA	18	35696237	35696605
ENSMUSG00000037236	14128.8	13772.9	13330.5	11072.1	13736.3	10954	NA	matrin 3	18	35721812	35751699
ENSMUSG00000037058	1526.85	1340.48	1274.12	1205.85	1847.4	1695.34	NA	polyadenylate-binding protein-interacting protein 2	18	35758271	35776840
ENSMUSG00000024354	7.36417	8.37771	5.47784	4.40899	4.34605	5.05544	NA	solute carrier family 23 (nucleobase transporters), member 1	18	35774258	35786898
ENSMUSG00000024353	1.20721	1.91677	0	1.25997	1.76392	1.33365	NA	RIKEN cDNA 2010001M09 gene	18	35806920	35809021
ENSMUSG00000073600	27.8478	22.4404	25.0598	25.9605	37.9279	42.8743	NA	predicted gene 1614	18	35811821	35814841
ENSMUSG00000024352	43.2607	38.4526	39.3486	45.9935	35.3989	39.0654	NA	spermatogenesis associated 24	18	35816344	35821840
ENSMUSG00000024350	1190.32	1373.27	1507.7	1669.08	2751.51	2339.22	NA	DnaJ (Hsp40) homolog, subfamily C, member 18	18	35830757	35862798
ENSMUSG00000073598	0.442714	1.20615	2.51403	2.64648	1.03958	2.17298	NA	RIKEN cDNA 1700066B19 gene	18	35862879	35890523
ENSMUSG00000073599	38.6716	32.7349	32.3368	45.3644	25.1642	26.4383	NA	endothelial cell surface expressed chemotaxis and apoptosis regulator	18	35872740	35882010
ENSMUSG00000024349	5.39247	8.51792	5.30109	7.05548	13.1657	21.5767	NA	transmembrane protein 173	18	35893332	35900208
ENSMUSG00000091842	0	0	0	0	0	0	NA	40S ribosomal protein S25-like	18	35929972	35930325
ENSMUSG00000091896	1207.79	1171.91	1231.77	1142.2	1067.71	1205.74	NA	ubiquitin-conjugating enzyme E2D 2A	18	35931213	35966826
ENSMUSG00000046668	387.12	334.592	396.707	508.432	551.256	550.877	NA	CXXC finger 5	18	35989472	36021341
ENSMUSG00000024347	1339.77	1649.64	1663.81	1499.32	1434.26	1399.79	NA	pleckstrin and Sec7 domain containing 2	18	36124484	36174369
ENSMUSG00000060275	54.5273	91.206	106.601	109.997	130.155	120.877	NA	neuregulin 2	18	36177333	36357034
ENSMUSG00000043991	754.813	1258.63	1359.6	3121.51	7222	7153.57	NA	purine rich element binding protein A	18	36440751	36461175
ENSMUSG00000046727	39.1143	88.2655	87.6771	137.98	247.036	255.87	NA	RIKEN cDNA 0610010O12 gene	18	36505273	36562634
ENSMUSG00000024346	391.068	453.677	473.149	513.615	557.807	560.698	NA	prefoldin 1	18	36563333	36614149
ENSMUSG00000024486	150.344	251.214	275.096	348.307	231.058	219.229	NA	heparin-binding EGF-like growth factor	18	36664583	36675459
ENSMUSG00000024485	0	1.3137	2.06425	3.02429	1.03958	1.97914	NA	solute carrier family 4, sodium bicarbonate cotransporter, member 9	18	36687805	36715909
ENSMUSG00000024483	1364.47	1166.86	1190.09	992.469	1108.12	1104.53	NA	ankyrin repeat and KH domain containing 1	18	36719641	36825571
ENSMUSG00000090264	2.73619	2.6274	3.41359	2.51994	1.44868	1.76398	NA	eukaryotic translation initiation factor 4E binding protein 3	18	36823714	36825571
ENSMUSG00000006050	309.375	340.041	334.035	316.143	417.208	410.821	NA	steroid receptor RNA activator 1	18	36826335	36830850
ENSMUSG00000001379	267.933	336.305	399.714	327.461	483.299	452.738	NA	amyloid beta (A4) precursor protein-binding, family B, member 3	18	36830814	36839020
ENSMUSG00000033272	178.831	161.057	173.539	200.251	180.565	193.824	NA	solute carrier family 35, member A4	18	36839233	36843512
ENSMUSG00000044719	0	0.958386	0	0.504351	2.26689	1.76398	NA	Riken cDNA E230025N22 gene	18	36844577	36855579
ENSMUSG00000051439	1.77086	5.50255	2.42565	7.56164	20.8784	20.8673	NA	CD14 antigen	18	36884728	36886390
ENSMUSG00000006850	131.875	141.453	104.617	95.4993	180	165.794	NA	transmembrane and coiled-coil domains 6	18	36894722	36902045
ENSMUSG00000014294	326.205	364.05	317.345	419.838	899.648	854.497	NA	NADH dehydrogenase (ubiquinone) 1 alpha subcomplex, 2	18	36902020	36904202
ENSMUSG00000024474	1384.52	1142.67	1260.39	1120.68	1085.27	951.754	NA	IK cytokine	18	36904310	36917293
ENSMUSG00000042660	213.12	228.274	183.603	174.138	150.027	150.221	NA	WD repeat domain 55	18	36919893	36923362
ENSMUSG00000044595	13.9639	19.5979	17.2368	16.6309	8.53803	10.0042	NA	dead end homolog 1 (zebrafish)	18	36923325	36925868
ENSMUSG00000001380	929.54	1032.75	1142.19	1191.16	1375.78	1264.8	NA	histidyl-tRNA synthetase	18	36926184	36942859
ENSMUSG00000019143	396.421	419.583	426.363	343.464	352.776	361.319	NA	histidyl-tRNA synthetase 2, mitochondrial (putative)	18	36942662	36952216
ENSMUSG00000001383	708.405	566.628	567.996	581.4	1183.69	1038.98	NA	zinc finger, matrin type 2	18	36953577	36959314
ENSMUSG00000063514	0	0	0	0	1.03958	0.666825	NA	NA	18	37080283	37081861
ENSMUSG00000007440	1960.06	3244.61	3710.03	3743.36	2336.89	2274.42	NA	protocadherin alpha 4	18	37089939	37347311
ENSMUSG00000091969	120.245	181.239	203.299	164.292	74.3061	72.4938	NA	NA	18	37105801	37108685
ENSMUSG00000073594	10.5841	20.8694	21.3653	19.3985	16.6935	21.5109	NA	NA	18	37168523	37180333
ENSMUSG00000051663	0	2.73495	4.93968	5.29115	2.36075	1.76398	NA	protocadherin beta 1	18	37424652	37427108
ENSMUSG00000051599	37.8683	48.6068	41.9669	37.9275	36.063	39.0014	NA	protocadherin beta 2	18	37454494	37457267
ENSMUSG00000045498	56.5789	64.4039	63.8624	67.2919	38.1758	47.9511	NA	protocadherin beta 3	18	37460453	37464239
ENSMUSG00000045689	93.0801	105.184	120.359	116.433	83.6287	61.6131	NA	protocadherin beta 4	18	37467109	37470827
ENSMUSG00000063687	78.6304	85.8437	86.6008	77.8669	67.4311	68.7274	NA	protocadherin beta 5	18	37480035	37483567
ENSMUSG00000051678	41.6907	47.6062	45.2842	51.5377	48.5911	48.3582	NA	protocadherin beta 6	18	37493682	37497087
ENSMUSG00000045062	162.334	196.269	196.551	188.752	120.705	108.337	NA	protocadherin beta 7	18	37501356	37504861
ENSMUSG00000045876	50.1822	69.8968	71.3319	76.9957	39.6511	41.626	NA	protocadherin beta 8	18	37514726	37517264
ENSMUSG00000051242	102.777	156.559	186.575	164.046	189.893	168.115	NA	protocadherin beta 9	18	37560509	37563563
ENSMUSG00000045657	44.9906	81.2668	84.7937	78.8793	90.2345	82.6492	NA	protocadherin beta 10	18	37571328	37574168
ENSMUSG00000051486	81.9324	127.475	123.162	132.178	95.1243	103.363	NA	protocadherin beta 11	18	37581072	37584686
ENSMUSG00000043458	39.4771	72.0383	107.275	95.38	128.249	125.047	NA	protocadherin beta 12	18	37595275	37598308
ENSMUSG00000047307	24.3061	46.2599	55.6054	56.1943	81.1262	84.3454	NA	protocadherin beta 13	18	37602171	37605863
ENSMUSG00000044043	69.1757	99.9295	104.737	113.544	172.937	144.132	NA	protocadherin beta 14	18	37607311	37610748
ENSMUSG00000047033	41.6108	55.7035	73.4766	68.8068	63.0514	63.0942	NA	protocadherin beta 15	18	37633200	37635994
ENSMUSG00000047910	205.076	279.799	254.766	247.965	262.863	258.977	NA	protocadherin beta 16	18	37637422	37642689
ENSMUSG00000046387	222.096	310.154	283.835	276.328	263.749	274.037	NA	protocadherin beta 17	18	37644675	37647943
ENSMUSG00000048347	139.358	198.714	210.631	167.341	167.585	150.26	NA	protocadherin beta 18	18	37649119	37654159
ENSMUSG00000043313	297.305	418.943	412.707	381.52	298.912	281.847	NA	protocadherin beta 19	18	37656651	37663781
ENSMUSG00000044022	129.054	185.932	171.956	161.914	144.835	114.162	NA	protocadherin beta 21	18	37673306	37677967
ENSMUSG00000073591	133.767	201.257	187.266	194.294	202.608	177.774	NA	protocadherin beta 22	18	37678007	37681073
ENSMUSG00000050304	17.3846	16.9283	12.4818	4.78862	7.78003	6.34643	NA	solute carrier family 25 (mitochondrial carrier, ornithine transporter) member 2	18	37797032	37798377
ENSMUSG00000051316	470.18	401.181	352.364	309.996	384.647	336.541	NA	TAF7 RNA polymerase II, TATA box binding protein (TBP)-associated factor	18	37800556	37803858
ENSMUSG00000073590	36.2572	36.4609	20.0318	22.8097	20.6978	25.4924	NA	NA	18	37815561	37818391
ENSMUSG00000023036	4161.7	5022.97	5930.84	5709.26	3707.9	4180.22	NA	protocadherin gamma subfamily B, 6	18	37833989	38001527
ENSMUSG00000024456	496.984	498.003	580.841	403.332	441.717	543.867	NA	diaphanous homolog 1 (Drosophila)	18	38003255	38095130
ENSMUSG00000024454	932.473	961.195	1116.32	1092.38	846.419	751.204	NA	histone deacetylase 3	18	38095498	38114642
ENSMUSG00000044024	267.041	519.485	632.215	882.842	678.364	766.954	NA	RELT-like 2	18	38114733	38118833
ENSMUSG00000038524	181.007	322.121	326.003	350.89	109.149	120.34	NA	FCH and double SH3 domains 1	18	38117085	38129428
ENSMUSG00000024451	127.649	99.1631	96.4485	109.634	70.0805	101.71	NA	ArfGAP with RhoGAP domain, ankyrin repeat and PH domain 3	18	38132278	38157228
ENSMUSG00000051375	625.27	889.627	1042.06	1106.49	1188.06	1477.21	NA	protocadherin 1	18	38345569	38371707
ENSMUSG00000066475	0.764492	0.355313	0	0	0	0.645494	NA	NA	18	38404463	38405066
ENSMUSG00000024442	291.667	317.241	312.316	268.425	259.853	274.132	NA	RIKEN cDNA 0610009O20 gene	18	38409903	38422283
ENSMUSG00000024440	145.595	131.458	89.3483	114.538	40.6641	43.4772	NA	protocadherin 12	18	38426746	38444055
ENSMUSG00000060450	2167.42	3199.25	3506.83	4166.95	5259.71	4959.6	NA	ring finger protein 14	18	38456289	38477501
ENSMUSG00000052102	116.499	126.676	109.235	113.155	173.622	181.281	NA	glucosamine-6-phosphate deaminase 1	18	38487212	38498657
ENSMUSG00000024425	1447.14	2238.3	2512.18	2941.37	3643.99	3703.59	NA	Nedd4 family interacting protein 1	18	38578629	38624053
ENSMUSG00000024427	45.7162	103.039	120.874	164.83	98.2094	147.335	NA	sprouty homolog 4 (Drosophila)	18	38745922	38760922
ENSMUSG00000036452	254.451	589.92	698.729	1176.82	2302.95	2367.69	NA	Rho GTPase activating protein 26	18	38761188	39535938
ENSMUSG00000073576	0	0	0	0	0	0	NA	NA	18	38761188	38805576
ENSMUSG00000036585	14.0848	46.8072	65.5652	257.362	1022.04	1097.38	NA	fibroblast growth factor 1	18	38998327	39089058
ENSMUSG00000024431	280.968	385.025	412.565	854.758	2640.86	2666.56	NA	nuclear receptor subfamily 3, group C, member 1	18	39570199	39650955
ENSMUSG00000051732	0	0	0	0	0	0	NA	poly(A) binding protein, cytoplasmic 2	18	39933151	39935736
ENSMUSG00000024487	560.448	575.179	514.682	606.862	668.109	621.785	NA	Yip1 domain family, member 5	18	40364519	40379053
ENSMUSG00000071860	10.0205	33.5857	28.9153	50.6483	124.293	129.412	NA	NA	18	40416616	40417338
ENSMUSG00000051401	32.0331	81.6452	79.5731	150.934	297.954	384.15	NA	potassium channel tetramerisation domain containing 16	18	40418015	40690757
ENSMUSG00000069391	0	0.603073	0	0	0	0	NA	NA	18	40885893	40886363
ENSMUSG00000056671	16.6201	10.8976	6.28903	8.06599	3.52784	3.72179	NA	PRELI domain containing 2	18	42035350	42110848
ENSMUSG00000073574	0	0.355313	0	0	3.49419	2.00047	NA	glutaredoxin, cysteine rich 2	18	42145855	42158703
ENSMUSG00000057719	1.64992	3.80089	4.40153	4.03118	53.4064	67.826	NA	SH3 domain containing ring finger 2	18	42213321	42318614
ENSMUSG00000034339	0	0	0.449781	0	0	0	NA	NA	18	42333006	42333317
ENSMUSG00000059455	0	0	0.538156	1.0087	0.409102	0.45166	NA	PLAC8-like 1	18	42338329	42356363
ENSMUSG00000024493	1248.14	1242.16	1356.73	1197.53	1184.53	997.128	NA	leucyl-tRNA synthetase	18	42362004	42421781
ENSMUSG00000072528	25.9171	43.8611	37.4295	26.7052	25.7947	34.0331	NA	NA	18	42412040	42412489
ENSMUSG00000024491	954.718	808.201	842.651	737.687	739.926	704.551	NA	RNA binding motif protein 27	18	42435007	42501196
ENSMUSG00000024497	32.7565	12.2113	14.3851	12.7299	1.44868	1.09715	NA	POU domain, class 4, transcription factor 3	18	42554193	42556903
ENSMUSG00000056849	4.62798	1.3137	0.449781	2.14213	1.03958	1.07582	NA	NA	18	42600673	42601161
ENSMUSG00000024498	1098.61	1045.69	1133.33	744.291	525.264	559.905	NA	transcription elongation regulator 1 (CA150)	18	42671141	42735439
ENSMUSG00000042816	9.25597	11.3604	22.3532	9.69833	38.693	27.836	NA	G protein-coupled receptor 151	18	42737674	42739306
ENSMUSG00000024500	1553.33	1662.82	1726.15	1958.94	1348.72	1320.01	NA	protein phosphatase 2 (formerly 2A), regulatory subunit B (PR 52), beta isoform	18	42797086	43219125
ENSMUSG00000048188	30.3011	36.3533	29.3651	30.1182	61.0129	42.9828	NA	NA	18	43330759	43332247
ENSMUSG00000039954	44.6277	66.6664	84.8584	115.939	160.382	154.113	NA	serine/threonine kinase 32A	18	43367351	43477135
ENSMUSG00000024501	21637.6	25982.8	26992.6	21269.2	1247.08	986.035	NA	dihydropyrimidinase-like 3	18	43480633	43597940
ENSMUSG00000043424	47.9665	50.1875	48.087	52.8195	34.8428	18.9521	NA	predicted gene 9781	18	43635074	43637450
ENSMUSG00000024502	1674.92	1797.49	1978.02	1744.45	1336.4	1222.34	NA	janus kinase and microtubule interacting protein 2	18	43691062	43847427
ENSMUSG00000024503	0	0	0	0	0	0	NA	serine peptidase inhibitor, Kazal type 3	18	43887723	43896891
ENSMUSG00000038791	0	0	0	0	0	0	NA	secretoglobin, family 3A, member 2	18	43923979	43927047
ENSMUSG00000071858	0	0	0	0	0	0	NA	predicted gene 94	18	43936850	43952532
ENSMUSG00000055561	0	0.355313	0	0	0	0	NA	serine peptidase inhibitor, Kazal type 5	18	44122889	44182155
ENSMUSG00000051050	0	0	0	0	0	0	NA	serine peptidase inhibitor, Kazal type 14	18	44187523	44191862
ENSMUSG00000055095	0	0	0	0	0	0	NA	serine peptidase inhibitor, Kazal type 6	18	44231047	44243264
ENSMUSG00000061144	0	0.355313	0	0	0	0.215165	NA	serine peptidase inhibitor, Kazal type 11	18	44264061	44268197
ENSMUSG00000069385	0	0	0	0	0	0	NA	predicted gene 10267	18	44316058	44318957
ENSMUSG00000053729	0	0	0	0	0.409102	0	NA	serine protease inhibitor, Kazal type-like	18	44326012	44334727
ENSMUSG00000073573	0	0	0	0	0	0	NA	serine peptidase inhibitor, Kazal type 11	18	44349699	44355831
ENSMUSG00000073572	0	0	0	0	0	0	NA	NA	18	44360918	44365672
ENSMUSG00000038071	0	2.51984	0.987937	0	0.409102	0.215165	NA	neuropeptide Y receptor Y6	18	44429781	44437354
ENSMUSG00000024471	0	0.355313	0.449781	1.25997	0.31524	0.881989	NA	myotilin	18	44493728	44515378
ENSMUSG00000024472	1300.25	1141.93	1177.59	1288.24	2031.16	1847.59	NA	DCP2 decapping enzyme homolog (S. cerevisiae)	18	44540154	44584623
ENSMUSG00000071856	203.063	253.029	271.538	423.032	468.162	490.269	NA	mutated in colorectal cancers	18	44584715	44971836
ENSMUSG00000034653	674.366	759.611	786.453	810.313	1115.27	991.091	NA	YTH domain containing 2	18	44988319	45049374
ENSMUSG00000054477	154.043	147.284	200.173	205.417	264.56	301.601	NA	potassium intermediate/small conductance calcium-activated channel, subfamily N, member 2	18	45428659	45845678
ENSMUSG00000033949	350.668	254.395	237.233	168.5	114.749	113.35	NA	tripartite motif-containing 36	18	46324956	46372261
ENSMUSG00000033993	1.64992	1.3137	1.52609	2.51994	0.31524	2.00047	NA	RIKEN cDNA 1700018A14 gene	18	46358675	46359385
ENSMUSG00000024477	373.923	326.727	343.095	328.531	341.22	283.099	NA	protein geranylgeranyltransferase type I, beta subunit	18	46399603	46440504
ENSMUSG00000071855	197.703	221.946	289.639	152.722	61.3353	72.6663	NA	coiled-coil domain containing 112	18	46441805	46471582
ENSMUSG00000090893	1.64992	0.710625	0.449781	0.37781	0.31524	1.11848	NA	NA	18	46515047	46516621
ENSMUSG00000046487	0.442714	0.958386	0.538156	1.25997	0.31524	0.881989	NA	NA	18	46624588	46625470
ENSMUSG00000033319	564.592	446.419	486.633	391.383	376.594	353.617	NA	fem-1 homolog c (C.elegans)	18	46664260	46685625
ENSMUSG00000056130	13.5622	10.8649	9.79099	17.2636	11.2406	18.0061	NA	toll-like receptor adaptor molecule 2	18	46718809	46734187
ENSMUSG00000033184	1781.89	1878.18	1838.65	2071.36	2822.28	2406.44	NA	transmembrane emp24 protein transport domain containing 7	18	46719889	46757189
ENSMUSG00000057561	668.729	769.026	765.738	793.679	722.098	686.744	NA	eukaryotic translation initiation factor 1A	18	46757358	46769879
ENSMUSG00000033022	274.442	371.561	376.974	422.64	157.719	162.156	NA	cysteine dioxygenase 1, cytosolic	18	46872859	46887996
ENSMUSG00000032905	1103.27	1432.18	1363.03	1650.43	1164.36	992.912	NA	autophagy related 12	18	46892071	46901233
ENSMUSG00000024480	514.721	482.871	451.839	545.262	347.289	353.352	NA	adaptor-related protein complex 3, sigma 1 subunit	18	46901571	46950480
ENSMUSG00000024481	2.09263	1.80922	1.43772	1.76432	1.35482	0.666825	NA	RIKEN cDNA 4833403I15 gene	18	47009693	47065100
ENSMUSG00000073568	0	0.355313	0	0.37781	0	0	NA	ADP-ribosylation factor-like 14 effector protein-like	18	47085636	47093876
ENSMUSG00000042705	190.104	187.732	179.266	198.839	196.452	186.359	NA	COMM domain containing 10	18	47118515	47393938
ENSMUSG00000019647	997.815	1026.09	1167.37	1313.92	558.605	495.728	NA	sema domain, transmembrane domain (TM), and cytoplasmic domain, (semaphorin) 6A	18	47395252	47528524
ENSMUSG00000059040	17.2637	19.0275	17.5256	19.5323	13.0718	14.9725	NA	enolase 1, alpha non-neuron	18	48204989	48208032
ENSMUSG00000024505	54.0846	67.667	74.5292	73.2121	78.491	67.9345	NA	DTW domain containing 2	18	49855799	49915255
ENSMUSG00000037416	1618.15	1671.85	1754.91	1563.1	2450.8	2275.38	NA	Dmx-like 1	18	49992667	50124739
ENSMUSG00000062210	81.1679	86.6618	85.163	173.791	113.346	124.386	NA	tumor necrosis factor, alpha-induced protein 8	18	50139081	50266827
ENSMUSG00000073567	3.62162	3.97375	4.57828	5.92023	5.29177	3.50663	NA	NA	18	50139145	50210974
ENSMUSG00000024507	1132.33	1005.76	927.303	1027.26	1291.27	1149.13	NA	hydroxysteroid (17-beta) dehydrogenase 4	18	50287855	50355923
ENSMUSG00000035420	0	0	0	0.504351	0	0	NA	family with sequence similarity 170, member A	18	50438023	50442673
ENSMUSG00000048875	0	0	0	0	0.724341	0.215165	NA	haloacid dehalogenase-like hydrolase domain containing 1A	18	50727310	50728353
ENSMUSG00000073565	21.5289	35.0166	30.1842	40.33	60.4692	67.4828	NA	proline rich 16	18	51277392	51579698
ENSMUSG00000069379	8.2496	17.5736	10.0561	11.9706	11.6568	9.91705	NA	NA	18	52024918	52025535
ENSMUSG00000024510	0	0	0	0	0	0	NA	ferritin mitochondrial	18	52491190	52492640
ENSMUSG00000024528	223.34	206.185	178.503	182.215	239.752	251.456	NA	serum response factor binding protein 1	18	52625347	52650392
ENSMUSG00000024529	197.837	106.859	41.1399	85.2082	52.3403	50.3606	NA	lysyl oxidase	18	52675723	52689521
ENSMUSG00000046886	3.29984	5.11458	7.00393	14.1164	2.61578	5.48577	NA	zinc finger protein 474	18	52775569	52799484
ENSMUSG00000024532	0	0	0	0	0	0	NA	RIKEN cDNA 1700034E13 gene	18	52805863	52823387
ENSMUSG00000053624	0	0	0	0	0	0	NA	glycerol kinase-like 1	18	52853333	52855322
ENSMUSG00000024534	612.822	460.263	482.816	292.758	42.9912	47.8213	NA	synuclein, alpha interacting protein (synphilin)	18	52927363	53075585
ENSMUSG00000034484	557.265	640.392	632.816	678.328	808.693	781.018	NA	sorting nexin 2	18	53336019	53380514
ENSMUSG00000024535	109.618	147.662	157.563	171.763	162.57	141.787	NA	sorting nexing 24	18	53405316	53550477
ENSMUSG00000024538	165.435	163.688	89.9023	175.563	71.5221	57.653	NA	peptidylprolyl isomerase C	18	53565995	53577661
ENSMUSG00000069378	18.5918	16.9379	11.052	15.6313	5.88859	5.87344	NA	PR domain containing 6	18	53624200	53735561
ENSMUSG00000048799	877.909	845.119	886.281	753.183	777.063	729.923	NA	centrosomal protein 120	18	53841380	53904207
ENSMUSG00000073563	989.652	921.338	998.142	919.299	980.629	925.368	NA	casein kinase 1, gamma 3	18	54021767	54115338
ENSMUSG00000069376	0.442714	0.603073	0.899562	0.504351	1.03958	1.07582	NA	NA	18	54143975	54144982
ENSMUSG00000052713	1548.88	1129.95	1241.11	875.623	456.363	447.903	NA	zinc finger protein 608	18	55047699	55152245
ENSMUSG00000001700	52.033	89.0415	96.9299	225.222	329.014	303.836	NA	GRAM domain containing 3	18	56559991	56663446
ENSMUSG00000053644	420.287	500.519	424.571	697.555	974.788	1013.43	NA	aldehyde dehydrogenase family 7, member A1	18	56669341	56732605
ENSMUSG00000008301	784.06	747.208	792.395	654.14	613.439	537.86	NA	phosphorylated adaptor for RNA export	18	56722097	56747366
ENSMUSG00000032900	4.38611	3.83354	3.32522	1.76432	1.89144	0	NA	RIKEN cDNA 1700065I17 gene	18	56748004	56754436
ENSMUSG00000024590	2517.19	1345.64	1248.26	1069	138.739	113.625	NA	lamin B1	18	56867467	56913078
ENSMUSG00000032656	67.0032	74.343	83.7742	80.8949	61.0058	60.3861	NA	membrane-associated ring finger (C3HC4) 3	18	56921370	57085202
ENSMUSG00000024592	147.124	152.435	112.664	127.901	201.241	196.238	NA	RIKEN cDNA C330018D20 gene	18	57115487	57135022
ENSMUSG00000024593	593.885	334.651	362.885	347.977	602.048	611.253	NA	multiple EGF-like-domains 10	18	57292744	57457121
ENSMUSG00000024594	340.324	343.309	392.291	346.136	150.638	161.532	NA	proline-rich coiled-coil 1	18	57514387	57552373
ENSMUSG00000069372	9.13503	10.8322	6.20065	21.9348	81.4149	75.1453	NA	cortexin 3	18	57628140	57637788
ENSMUSG00000058925	0	2.13188	3.32522	2.77303	3.21261	3.72179	NA	RIKEN cDNA 1700011I03 gene	18	57693434	57890719
ENSMUSG00000024597	1231.81	1252.18	1307.53	1381.49	4303.74	3453.46	NA	solute carrier family 12, member 2	18	58038332	58106475
ENSMUSG00000024598	705.943	594.708	420.041	296.733	65.1305	84.9483	NA	fibrillin 2	18	58168277	58369580
ENSMUSG00000024600	11.9123	19.8783	14.2809	18.021	7.78003	4.10946	NA	solute carrier family 27 (fatty acid transporter), member 6	18	58715911	58772427
ENSMUSG00000024601	664.993	821.981	1006.31	1006.5	395.237	379.478	NA	isochorismatase domain containing 1	18	58819136	58839224
ENSMUSG00000053441	50.9856	43.3098	59.1074	55.954	16.063	13.3383	NA	a disintegrin-like and metallopeptidase (reprolysin type) with thrombospondin type 1 motif, 19	18	58996418	59213332
ENSMUSG00000050875	325.026	371.141	420.483	343.656	182.83	176.617	NA	RIKEN cDNA A730017C20 gene	18	59221902	59236616
ENSMUSG00000058152	92.5575	154.469	151.588	168.071	227.457	297.465	NA	chondroitin sulfate synthase 3	18	59335055	59570100
ENSMUSG00000073555	3.62162	5.36234	4.40153	3.4021	6.83431	10.9502	NA	predicted gene 4951	18	60371734	60407474
ENSMUSG00000068606	2.09263	2.87516	4.40153	6.67767	0.31524	3.0763	NA	predicted gene 4841	18	60427959	60432926
ENSMUSG00000090942	10.5431	11.5755	12.3934	7.55983	7.74638	8.23839	NA	RIKEN cDNA F830016B08 gene	18	60453034	60462670
ENSMUSG00000054072	5.19163	14.3431	10.1445	7.18383	40.6977	37.6696	NA	interferon inducible GTPase 1	18	60535683	60552281
ENSMUSG00000063388	0.442714	0	0.449781	0	0.31524	0.430329	NA	NA	18	60598949	60603502
ENSMUSG00000038059	9.3769	10.1869	15.7186	19.9083	84.4664	63.2881	NA	RIKEN cDNA 2010002N04 gene	18	60633847	60661637
ENSMUSG00000024603	1649.22	1737.85	1870.65	1781.93	2126.4	1910.26	NA	dynactin 4	18	60685868	60718416
ENSMUSG00000024604	577.541	520.808	574.888	432.608	331.079	309.365	NA	RNA binding motif protein 22	18	60720390	60732464
ENSMUSG00000049173	0	0	0	0	0	0	NA	myozenin 3	18	60735970	60751442
ENSMUSG00000043079	39.8788	66.8257	53.8221	120.561	513.648	692.185	NA	synaptopodin	18	60753627	60819796
ENSMUSG00000054008	1338.24	1533.47	1933.44	1765.35	1371.76	1361.82	NA	N-deacetylase/N-sulfotransferase (heparan glucosaminyl) 1	18	60845632	60908304
ENSMUSG00000024608	2749.39	3167.67	2518.4	2041.32	2323.02	2642.13	NA	ribosomal protein S14	18	60934164	60938200
ENSMUSG00000024610	2.53535	1.3137	0.987937	7.18202	34.9561	40.0577	NA	CD74 antigen (invariant polypeptide of major histocompatibility complex, class II antigen-associated)	18	60963502	60972300
ENSMUSG00000024613	425.431	358.785	383.197	340.511	145.513	165.899	NA	Treacher Collins Franceschetti syndrome 1, homolog	18	60973409	61008625
ENSMUSG00000036412	34.3676	21.3745	7.10021	22.1842	10.6172	11.8535	NA	arylsulfatase i	18	61071434	61078215
ENSMUSG00000024617	215.973	363.101	486.031	748.415	4322.04	6667.86	NA	calcium/calmodulin-dependent protein kinase II alpha	18	61085272	61147806
ENSMUSG00000052026	128.975	508.484	682.033	935.658	803.011	673.517	NA	solute carrier family 6 (neurotransmitter transporter, L-proline), member 7	18	61155035	61173853
ENSMUSG00000024619	0	0	0	0	0	0.215165	NA	caudal type homeobox 1	18	61178516	61195853
ENSMUSG00000024620	446.483	342.067	329.561	352.237	329.43	362.994	NA	platelet derived growth factor receptor, beta polypeptide	18	61204804	61244715
ENSMUSG00000024621	238.074	216.288	205.941	411.986	924.842	985.891	NA	colony stimulating factor 1 receptor	18	61265226	61291803
ENSMUSG00000024622	668.336	711.55	735.41	716.325	914.732	859.267	NA	HMG box domain containing 3	18	61290933	61336704
ENSMUSG00000034320	167.568	176.091	180.351	194.195	264.225	256.271	NA	solute carrier family 26 (sulfate transporter), member 2	18	61352573	61371266
ENSMUSG00000024575	0.885429	1.56146	1.43772	1.51305	1.9853	4.25877	NA	phosphodiesterase 6A, cGMP-specific, rod, alpha	18	61380136	61449578
ENSMUSG00000033871	19.0345	43.7496	45.453	70.8278	87.8543	93.3184	NA	peroxisome proliferative activated receptor, gamma, coactivator 1 beta	18	61457790	61560085
ENSMUSG00000045094	42.8979	43.6978	47.6056	28.2255	64.4062	55.7202	NA	Rho guanine nucleotide exchange factor (GEF) 37	18	61653448	61696190
ENSMUSG00000024576	6043.11	5649.38	5711.37	5287.05	5927.85	5205.83	NA	casein kinase 1, alpha 1	18	61714928	61749715
ENSMUSG00000024578	0.442714	0.355313	0.538156	0.504351	0.630479	1.07582	NA	interleukin 17B	18	61847589	61852191
ENSMUSG00000024579	367.934	353.201	275.2	337.454	344.521	283.183	NA	prenylcysteine oxidase 1 like	18	61856491	61867289
ENSMUSG00000024580	647.885	680.657	673.667	551.504	426.572	417.377	NA	GrpE-like 2, mitochondrial	18	61872094	61885985
ENSMUSG00000033032	146.845	140.533	167.741	213.087	417.384	437.011	NA	actin filament associated protein 1-like 1	18	61889915	61946356
ENSMUSG00000032735	787.837	1376.78	1553.85	1567.05	281.905	286.718	NA	actin binding LIM protein family, member 3	18	61959049	62071506
ENSMUSG00000045629	26.8825	25.5633	18.1364	27.4699	82.6972	88.9974	NA	SH3 domain and tetratricopeptide repeats 2	18	62112729	62184019
ENSMUSG00000045730	15.3719	16.7228	4.31315	20.2915	31.5965	43.2833	NA	adrenergic receptor, beta 2	18	62337471	62339613
ENSMUSG00000054589	1.64992	2.02432	1.07631	1.25997	3.52784	4.81894	NA	NA	18	62339780	62344059
ENSMUSG00000026322	28.6123	81.1593	79.0996	91.4862	104.233	117.088	NA	5 hydroxytryptamine (serotonin) receptor 4	18	62483858	62627456
ENSMUSG00000042211	975.295	806.764	837.719	710.366	958.261	825.94	NA	F-box protein 38	18	62663723	62708397
ENSMUSG00000044176	19.2354	22.1927	20.7388	19.5286	18.0483	16.2635	NA	serine peptidase inhibitor, Kazal type 10	18	62708565	62821020
ENSMUSG00000060201	0.442714	0	0	0	0	0	NA	serine peptidase inhibitor, Kazal type 7 (putative)	18	62752067	62755918
ENSMUSG00000073551	0	0.355313	0.449781	1.76432	1.76392	0.215165	NA	serine peptidase inhibitor, Kazal type 13	18	62767194	62901041
ENSMUSG00000091744	14.2856	16.087	12.5781	13.3553	9.41644	9.68055	NA	NA	18	62821762	62822582
ENSMUSG00000041789	12.3139	10.5422	8.98771	10.2081	25.5733	14.4355	NA	NA	18	62911329	62916001
ENSMUSG00000071847	773.044	653.726	742.733	740.041	446.943	325.998	NA	adenomatosis polyposis coli down-regulated 1	18	63081981	63112849
ENSMUSG00000024581	750.906	1144.66	1277.14	1678.79	3111.56	2680.91	NA	N-ethylmaleimide sensitive fusion protein attachment protein gamma	18	63137490	63159104
ENSMUSG00000041482	147.327	184.634	129.508	152.878	44.849	48.9824	NA	family with sequence similarity 38, member B	18	63169867	63546837
ENSMUSG00000024583	933.809	920.142	880.163	954.057	1186.53	1076.11	NA	thioredoxin-like 1	18	63822455	63852013
ENSMUSG00000040560	2100.25	2726.52	2911.96	3146.41	4599.47	4265.99	NA	WD repeat domain 7	18	63868349	64149414
ENSMUSG00000056812	690.695	1023.41	1214.03	1271.17	1282.35	1408.62	NA	ST8 alpha-N-acetyl-neuraminide alpha-2,8-sialyltransferase 3	18	64414013	64435800
ENSMUSG00000045991	397.665	272.688	282.662	195.854	93.4277	111.346	NA	one cut domain, family member 2	18	64500018	64558140
ENSMUSG00000060096	7.28427	18.4244	9.16446	16.1302	29.8592	25.3839	NA	S-adenosylmethionine decarboxylase, pseudogene 3	18	64608334	64609669
ENSMUSG00000024588	394.564	319.35	352.203	390.642	734.094	609.106	NA	ferrochelatase	18	64616204	64648720
ENSMUSG00000024587	1408.45	1664.84	1941.63	2025.35	2836.03	2530.17	NA	asparaginyl-tRNA synthetase	18	64659319	64676211
ENSMUSG00000039529	14.7694	31.3137	31.614	34.6483	77.8605	83.3586	NA	ATPase, class I, type 8B, member 1	18	64688633	64820654
ENSMUSG00000024589	1864.24	1641.82	1604.37	1194.24	1124.72	1374.87	NA	neural precursor cell expressed, developmentally down-regulated gene 4-like	18	65047410	65377480
ENSMUSG00000032845	0.442714	2.27208	0.987937	6.80602	28.2901	18.1573	NA	alpha-kinase 2	18	65425183	65553542
ENSMUSG00000073546	0	0	0	0	0.724341	0	NA	NA	18	65466084	65469530
ENSMUSG00000032688	60.9261	83.4314	92.7698	84.165	81.0997	85.6383	NA	mucosa associated lymphoid tissue lymphoma translocation gene 1	18	65590617	65638477
ENSMUSG00000042439	2294.11	2055.24	1744.61	1541.51	1138.54	1305.44	NA	zinc finger protein 532	18	65739884	65849088
ENSMUSG00000046610	4.38611	12.5666	14.1925	8.69326	6.74045	13.2725	NA	O-acyltransferase like	18	65857922	65911255
ENSMUSG00000024516	216.703	308.335	308.517	377.872	579.544	682.862	NA	SEC11 homolog C (S. cerevisiae)	18	65960203	65977319
ENSMUSG00000024517	16.9419	44.8713	53.4686	63.4956	56.0293	60.5762	NA	gastrin releasing peptide	18	66032474	66046232
ENSMUSG00000024518	2.29347	1.20615	2.06425	0	1.03958	1.57014	NA	retina and anterior neural fold homeobox	18	66094293	66098743
ENSMUSG00000024519	0	1.3137	0	0.504351	0.818203	0.881989	NA	complexin 4	18	66115381	66129832
ENSMUSG00000041891	770.271	700.088	731.932	746.697	814.057	707.698	NA	lectin, mannose-binding, 1	18	66140408	66182234
ENSMUSG00000046318	57.5053	161.23	144.623	75.8296	44.2521	39.1099	NA	collagen and calcium binding EGF domains 1	18	66204956	66462393
ENSMUSG00000024521	18.2701	17.2509	26.0478	16.7592	32.7565	34.5914	NA	phorbol-12-myristate-13-acetate-induced protein 1	18	66618258	66625204
ENSMUSG00000047259	155.654	87.8353	67.123	56.8198	36.1834	21.8346	NA	melanocortin 4 receptor	18	67017369	67020126
ENSMUSG00000024524	1032.35	1969.82	2424.92	2833.08	1731.15	2063.82	NA	guanine nucleotide binding protein, alpha stimulating, olfactory type	18	67247990	67386446
ENSMUSG00000062526	35.5338	57.0403	60.3367	90.4685	193.44	202.107	NA	metallophosphoesterase 1	18	67385184	67405484
ENSMUSG00000024525	25.8351	27.265	29.7344	52.4181	55.815	42.7445	NA	inositol (myo)-1(or 4)-monophosphatase 2	18	67448907	67478800
ENSMUSG00000024526	1.52898	22.6459	22.4574	47.3818	40.0938	31.236	NA	cell death-inducing DNA fragmentation factor, alpha subunit-like effector A	18	67503218	67527448
ENSMUSG00000001473	92.4776	50.5889	29.807	78.8938	31.8445	26.1165	NA	tubulin, beta 6 class V	18	67550371	67562402
ENSMUSG00000024527	574.09	658.62	720.534	818.589	914.411	921.03	NA	AFG3(ATPase family gene 3)-like 2 (yeast)	18	67564421	67608820
ENSMUSG00000024530	136.781	228.046	259.618	243.196	194.756	189.157	NA	slowmo homolog 1 (Drosophila)	18	67624503	67640235
ENSMUSG00000024533	1466.1	1510.46	1721.73	1797.81	2423.11	2489.25	NA	spire homolog 1 (Drosophila)	18	67647863	67770443
ENSMUSG00000091695	1.20721	0	0	0	0	0.215165	NA	predicted gene 11449	18	67722041	67722505
ENSMUSG00000073542	209.136	137.176	138.673	148.687	650.228	402.983	NA	centrosomal protein 76	18	67777051	67800990
ENSMUSG00000024537	159.476	117.611	121.436	131.673	134.561	127.913	NA	proteasome (prosome, macropain) assembly chaperone 2	18	67801253	67813816
ENSMUSG00000024539	399.758	411.117	321.504	392.88	411.541	374.029	NA	protein tyrosine phosphatase, non-receptor type 2	18	67825165	67884249
ENSMUSG00000079614	431.469	326.681	312.958	325.376	323.274	317.795	NA	SEH1-like (S. cerevisiae	18	67934530	67955115
ENSMUSG00000024542	762.412	488.083	472.594	409.954	180.094	196.815	NA	centrosomal protein 192	18	67959761	68044822
ENSMUSG00000024544	165.113	249.055	244.357	378.49	601.368	632.772	NA	DNA segment, Chr 18, ERATO Doi 653, expressed	18	68092911	68415203
ENSMUSG00000038121	713.001	673.637	696.783	719.936	903.732	986.715	NA	RIKEN cDNA 4933403F05 gene	18	68419841	68459987
ENSMUSG00000009535	1313.43	1453.91	1620.49	1359.93	1465.34	1314.12	NA	RNA (guanine-7-) methyltransferase	18	68460009	68484506
ENSMUSG00000007480	8.3295	6.89115	8.70678	9.45251	3.52784	5.52843	NA	melanocortin 5 receptor	18	68497250	68499377
ENSMUSG00000045569	0	0	0.449781	0.504351	0	0	NA	melanocortin 2 receptor	18	68566561	68588905
ENSMUSG00000024546	0	0	0	0.504351	0	0.215165	NA	NA	18	69104287	69109795
ENSMUSG00000053477	6004.81	6101.39	5721.17	4940.63	4306.15	4022.79	NA	transcription factor 4	18	69503800	69847621
ENSMUSG00000038903	1.52898	1.77656	3.14056	4.033	4.53377	2.90379	NA	coiled-coil domain containing 68	18	70085080	70129138
ENSMUSG00000024511	162.776	354.937	371.215	737.978	922.312	857.156	NA	RAB27b, member RAS oncogene family	18	70138785	70301259
ENSMUSG00000024512	0	0	0	0	0	0	NA	RIKEN cDNA 2310002L13 gene	18	70400083	70404052
ENSMUSG00000044906	220.521	195.246	166.663	148.445	96.9679	99.0406	NA	RIKEN cDNA 4930503L19 gene	18	70612794	70632134
ENSMUSG00000079608	7.44408	8.87323	10.7789	9.0747	21.1671	24.0057	NA	StAR-related lipid transfer (START) domain containing 6	18	70632108	70660720
ENSMUSG00000038425	124.347	146.078	140.631	142.767	109.014	107.839	NA	polymerase (DNA directed), iota	18	70668334	70690274
ENSMUSG00000024513	242.899	251.131	250.011	321.998	483.883	463.414	NA	methyl-CpG binding domain protein 2	18	70727843	70785785
ENSMUSG00000060534	1573.6	967.381	989.844	826.484	269.43	331.448	NA	deleted in colorectal carcinoma	18	71418392	72510723
ENSMUSG00000037253	1455.54	1201.31	1104.59	1010.86	1067.56	918.54	NA	mex3 homolog C (C. elegans)	18	73732698	73752229
ENSMUSG00000024515	1156.62	946.09	891.88	751.268	646.479	748.233	NA	SMAD family member 4	18	73798663	73863434
ENSMUSG00000036941	106.079	145.152	184.141	172.005	340.827	352.166	NA	elaC homolog 1 (E. coli)	18	73894692	73914133
ENSMUSG00000024556	402.861	398.166	328.525	408.164	427.418	428.065	NA	malic enzyme 2, NAD(+)-dependent, mitochondrial	18	73929694	73975046
ENSMUSG00000064036	30.6639	53.6465	70.4166	123.635	97.9951	113.474	NA	maestro	18	74019039	74040987
ENSMUSG00000024558	290.347	398.905	450.652	497.061	971.829	1115.54	NA	mitogen-activated protein kinase 4	18	74088140	74225013
ENSMUSG00000053861	0.885429	2.51984	5.65459	3.65337	9.82554	8.38956	NA	NA	18	74224756	74225238
ENSMUSG00000036223	44.144	20.9443	11.5901	28.6142	2.07916	1.07582	NA	spindle and kinetochore associated complex subunit 1	18	74354953	74367472
ENSMUSG00000024560	567.927	495.525	479.396	408.918	345.814	333.006	NA	CXXC finger 1 (PHD domain)	18	74375785	74381145
ENSMUSG00000024561	450.992	424.782	476.394	382.923	410.376	397.413	NA	methyl-CpG binding domain protein 1	18	74427926	74442339
ENSMUSG00000035394	13.4801	9.30344	9.16446	4.91334	7.78003	5.24927	NA	coiled-coil domain containing 11	18	74442744	74519640
ENSMUSG00000025885	133.358	272.095	355.888	500.658	554.258	523.964	NA	myosin VB	18	74600590	74931147
ENSMUSG00000036880	262.985	290.045	279.097	303.902	281.884	341.182	NA	acetyl-Coenzyme A acyltransferase 2 (mitochondrial 3-oxoacyl-Coenzyme A thiolase)	18	74938851	74965861
ENSMUSG00000053846	190.989	122.239	101.612	47.1124	48.2493	48.2071	NA	lipase, endothelial	18	75098976	75120917
ENSMUSG00000062328	3547.77	3365.53	3236.64	2772.77	2248.76	2677.36	NA	ribosomal protein L17	18	75160131	75163035
ENSMUSG00000036299	520.764	663.443	618.048	733.992	1118.06	992.102	NA	cDNA sequence BC031181	18	75165554	75169587
ENSMUSG00000035765	246.354	256.102	308.034	399.733	342.454	423.419	NA	dymeclin	18	75178426	75446620
ENSMUSG00000025880	172.68	188.443	178.359	200.599	400.878	392.03	NA	SMAD family member 7	18	75527183	75555589
ENSMUSG00000052928	626.069	704.672	777.196	785.369	433.576	543.748	NA	CBP80/20-dependent translation initiation factor	18	75590878	75857350
ENSMUSG00000044646	115.214	137.616	186.801	140.524	50.4489	55.8426	NA	zinc finger and BTB domain containing 7C	18	75979832	76308215
ENSMUSG00000024563	913.321	911.271	867.688	690.417	529.095	519.961	NA	SMAD family member 2	18	76401234	76465385
ENSMUSG00000091519	29.6986	30.2804	33.7745	29.7513	10.8049	5.65827	NA	SKI family transcriptional corepressor 2	18	77095144	77139081
ENSMUSG00000090000	353.603	433.711	396.628	387.093	369.806	366.093	NA	immediate early response 3 interacting protein 1	18	77168756	77180344
ENSMUSG00000025421	550.063	578.156	572.047	714.025	1474.49	1504.61	NA	haloacid dehalogenase-like hydrolase domain containing 2	18	77168865	77211641
ENSMUSG00000025420	70.9055	58.0178	48.1517	45.9971	44.3194	58.0175	NA	katanin p60 subunit A-like 2	18	77215887	77286047
ENSMUSG00000025423	1274.61	1124.46	1098.61	947.345	1098.38	1104.18	NA	protein inhibitor of activated STAT 2	18	77303947	77394447
ENSMUSG00000073532	2.09263	2.37964	5.56622	3.14902	36.1303	30.6971	NA	NA	18	77423745	77424996
ENSMUSG00000025425	24.1441	39.0883	49.0433	97.9145	565.38	590.27	NA	ST8 alpha-N-acetyl-neuraminide alpha-2,8-sialyltransferase 5	18	77424586	77494189
ENSMUSG00000032818	0.764492	0.355313	1.61447	0.75562	3.52784	4.21611	NA	lipoxygenase homology domains 1	18	77520697	77681080
ENSMUSG00000025427	524.007	403.71	529.721	318.847	167.968	181.967	NA	ring finger protein 165	18	77694852	77803875
ENSMUSG00000047466	410.986	383.183	352.411	342.244	847.697	837.44	NA	RIKEN cDNA 8030462N17 gene	18	77743695	77952749
ENSMUSG00000041840	131.829	93.4781	107.428	104.608	98.7726	83.2965	NA	HAUS augmin-like complex, subunit 1	18	77996306	78006519
ENSMUSG00000025428	7791.35	8361.36	9041.27	10707.5	16633.2	14752.7	NA	ATP synthase, H+ transporting, mitochondrial F1 complex, alpha subunit 1	18	78012468	78021608
ENSMUSG00000025429	12.3139	20.7714	23.1802	33.1407	64.1919	68.1552	NA	proline-serine-threonine phosphatase-interacting protein 2	18	78033042	78120746
ENSMUSG00000039840	786.766	946.881	879.054	983.472	1313.11	1377.61	NA	RIKEN cDNA 5430411K18 gene	18	78135239	78231750
ENSMUSG00000091055	0	0.355313	1.07631	0	1.35482	0.645494	NA	sialic acid binding Ig-like lectin 15	18	78240353	78254134
ENSMUSG00000059336	22.5352	27.1997	39.2444	207.08	149.933	162.635	NA	solute carrier family 14 (urea transporter), member 1	18	78296830	78338858
ENSMUSG00000024552	19.5572	18.4667	18.875	5.16643	1.35482	1.33365	NA	solute carrier family 14 (urea transporter), member 2	18	78342883	78405833
ENSMUSG00000090451	1.20721	2.16453	1.52609	0.37781	2.93102	1.50615	NA	NA	18	78546493	78547440
ENSMUSG00000024548	2081.63	1524.39	1543.56	1016.79	613.918	728.824	NA	SET binding protein 1	18	78947119	79306130
ENSMUSG00000073526	0	0	0	0	0	0	NA	NA	18	80209374	80209619
ENSMUSG00000073525	0	0	0	0	0	0	NA	NA	18	80213024	80213269
ENSMUSG00000073524	0	0	0	0	0	0	NA	NA	18	80216293	80216538
ENSMUSG00000091385	0	0	0	0	0	0	NA	NA	18	80219549	80219794
ENSMUSG00000091999	0	0	0	0	0	0	NA	NA	18	80222832	80223077
ENSMUSG00000073521	0	0	0	0	0	0	NA	NA	18	80226095	80226340
ENSMUSG00000056214	340.402	253.352	274.855	251.137	113.642	116.014	NA	par-6 partitioning defective 6 homolog gamma (C. elegans)	18	80243634	80316379
ENSMUSG00000053950	505.033	458.097	459.173	408.518	418.634	474.526	NA	ADNP homeobox 2	18	80323077	80348221
ENSMUSG00000024570	190.784	230.869	270.654	314.255	291.757	288.434	NA	ribosome binding factor A	18	80389004	80397397
ENSMUSG00000024571	725.155	682.822	737.298	578.097	907.788	877.356	NA	NA	18	80403504	80409480
ENSMUSG00000057130	268.049	289.503	252.14	237.641	209.289	222.348	NA	thioredoxin-like 4A	18	80403534	80420272
ENSMUSG00000078963	1.64992	2.27208	4.93968	3.78173	9.76533	10.8844	NA	heat shock factor binding protein 1-like 1	18	80426497	80443841
ENSMUSG00000034006	239.884	292.5	308.711	223.255	235.151	246.077	NA	PQ loop repeat containing 1	18	80450031	80489464
ENSMUSG00000059852	7.04239	15.1517	10.3212	18.7748	29.6378	26.5023	NA	potassium voltage-gated channel, subfamily G, member 2	18	80492368	80493072
ENSMUSG00000033323	504.15	402.005	397.64	359.39	415.266	392.656	NA	CTD (carboxy-terminal domain, RNA polymerase II, polypeptide A) phosphatase, subunit 1	18	80604698	80666434
ENSMUSG00000033016	23.9433	27.4148	30.7223	42.9819	27.525	29.6658	NA	nuclear factor of activated T cells, cytoplasmic, calcineurin dependent 1	18	80802944	80909810
ENSMUSG00000024566	927.449	953.205	936.627	829.576	1070.58	1144.07	NA	ATPase, class II, type 9B	18	80931816	81130797
ENSMUSG00000024565	250.786	235.592	285.119	229.237	42.8637	44.962	NA	sal-like 3 (Drosophila)	18	81163115	81183317
ENSMUSG00000024553	20.7255	40.3367	48.5778	78.14	44.4399	37.1734	NA	galanin receptor 1	18	82561888	82576169
ENSMUSG00000041607	325.874	462.618	568.201	4340.2	26616.4	29785.7	NA	myelin basic protein	18	82644538	82755029
ENSMUSG00000041258	822.943	764.749	727.906	626.014	774.789	876.069	NA	zinc finger protein 236	18	82762989	82862126
ENSMUSG00000058881	535.013	310.532	299.593	375.586	413.052	483.599	NA	zinc finger protein 516	18	83080271	83174706
ENSMUSG00000046982	910.175	781.38	930.009	792.617	539.326	509.662	NA	teashirt zinc finger family member 1	18	84181019	84255796
ENSMUSG00000049090	84.7074	74.8481	98.6328	138.393	126.432	147.941	NA	zinc binding alcohol dehydrogenase, domain containing 2	18	84257550	84266906
ENSMUSG00000048410	908.253	756.971	727.763	639.406	692.125	786.042	NA	zinc finger protein 407	18	84297419	84759117
ENSMUSG00000056162	0.885429	2.02432	1.97587	2.64648	7.59231	6.86208	NA	carnosine dipeptidase 1 (metallopeptidase M20 family)	18	84779901	84819476
ENSMUSG00000024644	311.235	315.993	351.521	431.456	424.369	386.244	NA	CNDP dipeptidase 2 (metallopeptidase M20 family)	18	84836862	84855025
ENSMUSG00000047992	54.0457	65.5255	74.8827	87.7063	94.9366	94.1169	NA	family with sequence similarity 69, member C	18	84889411	84909828
ENSMUSG00000092153	0.764492	0	0	0.37781	0.724341	0	NA	NA	18	84967983	85006108
ENSMUSG00000024646	427.485	495.08	433.318	486.622	598.389	523.068	NA	cytochrome b-5	18	85020730	85049793
ENSMUSG00000034391	2.41441	3.12292	2.42565	3.27738	3.93695	2.62464	NA	F-box protein 15	18	85104550	85150768
ENSMUSG00000024645	164.668	167.886	137.909	118.334	131.784	134.601	NA	RIKEN cDNA 1700034H14 gene	18	85116686	85120916
ENSMUSG00000050321	167.925	440.534	465.259	573.818	437.237	500.338	NA	neuropilin (NRP) and tolloid (TLL)-like 1	18	86564344	86671289
ENSMUSG00000024647	721.499	987.108	1108.23	1184.8	798.293	731.866	NA	cerebellin 2 precursor protein	18	86880502	86887675
ENSMUSG00000056153	728.489	634.487	665.362	691.558	721.217	575.777	NA	suppressor of cytokine signaling 6	18	88834616	89096873
ENSMUSG00000023066	268.211	216.966	190.953	157.769	157.451	156.823	NA	rotatin	18	89141182	89300405
ENSMUSG00000034028	3.29984	0.710625	1.34934	0.37781	1.54254	3.52796	NA	CD226 antigen	18	89366823	89439593
ENSMUSG00000073514	273.243	382.211	388.78	421.349	416.967	501.014	NA	docking protein 6	18	89470474	89938920
ENSMUSG00000024614	864.953	907.212	850.186	1068.6	2130.02	1783.84	NA	thioredoxin-related transmembrane protein 3	18	90679546	90712659
ENSMUSG00000090756	25.7552	31.8092	24.8831	16.884	27.8137	23.9862	NA	NA	18	90761007	90761174
ENSMUSG00000047735	78.7945	134.89	58.0232	143.899	205.894	197.758	NA	sterile alpha motif domain containing 9-like	6	3322257	3349571
ENSMUSG00000044156	8.45044	12.6415	10.0561	7.31037	2.30054	3.09763	NA	HEPACAM family member 2	6	3407096	3444498
ENSMUSG00000001376	989.3	1184.68	1105.48	1231.75	1860.89	1726.57	NA	coiled-coil domain containing 132	6	3448382	3553319
ENSMUSG00000023964	84.3036	86.5639	114.416	89.7364	36.318	21.0806	NA	calcitonin receptor	6	3635677	3714713
ENSMUSG00000029664	2.41441	1.06594	1.07631	0.504351	0.31524	0	NA	tissue factor pathway inhibitor 2	6	3912594	3918375
ENSMUSG00000029663	0	1.3137	0	0.37781	0	0.430329	NA	guanine nucleotide binding protein (G protein), gamma transducing activity polypeptide 1	6	3943797	3947436
ENSMUSG00000032766	45.9559	53.9596	34.2969	63.6476	143.333	193.105	NA	guanine nucleotide binding protein (G protein), gamma 11	6	3953943	3958445
ENSMUSG00000032757	156.619	165.712	123.339	162.943	308.222	298.657	NA	blocked early in transport 1 homolog (S. cerevisiae)	6	4026899	4036972
ENSMUSG00000029661	2952.99	1562.4	591.768	1535.44	1070.19	1095.71	NA	collagen, type I, alpha 2	6	4454814	4491543
ENSMUSG00000015189	1074.77	1160.89	1337.96	1360.54	1630.47	1416.34	NA	CAS1 domain containing 1	6	4550840	4593381
ENSMUSG00000004631	305.028	315.516	274.894	275.739	290.879	255.42	NA	sarcoglycan, epsilon	6	4624350	4697204
ENSMUSG00000092035	1661.04	1027.94	1170.35	851.512	284.898	339.891	NA	paternally expressed 10	6	4697306	4710517
ENSMUSG00000032827	2669.15	3166.3	3345.03	3135.73	5873.42	5891.2	NA	protein phosphatase 1, regulatory (inhibitor) subunit 9A	6	4852917	5115661
ENSMUSG00000002588	2.21357	12.071	7.80721	1.51124	2.61578	2.86113	NA	paraoxonase 1	6	5118090	5143946
ENSMUSG00000029759	28.8542	24.217	15.1805	27.9797	32.1261	36.3127	NA	paraoxonase 3	6	5170852	5206286
ENSMUSG00000032667	180.485	186.418	200.551	353.367	779.528	722.481	NA	paraoxonase 2	6	5214147	5248455
ENSMUSG00000042607	207.646	161.07	190.416	129.434	36.7006	32.0094	NA	ankyrin repeat and SOCS box-containing 4	6	5333386	5383022
ENSMUSG00000019577	26.5996	24.7778	29.4693	42.7179	73.9643	90.1799	NA	pyruvate dehydrogenase kinase, isoenzyme 4	6	5433351	5446309
ENSMUSG00000029757	460.28	1135.59	1116.61	1389.84	2025.27	1784.39	NA	dynein cytoplasmic 1 intermediate chain 1	6	5675639	5978039
ENSMUSG00000015112	111.512	75.4416	59.7418	60.1135	75.2784	67.6572	NA	solute carrier family 25 (mitochondrial carrier, adenine nucleotide translocator), member 13	6	5991219	6167173
ENSMUSG00000042541	645.89	568.939	425.745	492.069	629.649	569.414	NA	split hand/foot malformation (ectrodactyly) type 1	6	6508283	6528652
ENSMUSG00000029754	105.066	61.9685	77.3558	25.0693	28.437	29.9876	NA	distal-less homeobox 6	6	6813334	6818568
ENSMUSG00000029755	65.6297	43.5441	46.5688	6.42277	4.66129	11.2934	NA	distal-less homeobox 5	6	6827805	6832085
ENSMUSG00000042505	103.621	115.315	109.235	120.603	157.721	158.05	NA	ACN9 homolog (S. cerevisiae)	6	6906004	6991770
ENSMUSG00000061762	146.72	275.114	267.988	322.092	425.268	459.883	NA	tachykinin 1	6	7505071	7512973
ENSMUSG00000029752	429.707	745.491	946.3	1078.76	1465.39	1485.91	NA	asparagine synthetase	6	7625169	7643254
ENSMUSG00000042460	182.817	198.584	236.518	298.272	260.274	223.403	NA	core 1 synthase, glycoprotein-N-acetylgalactosamine 3-beta-galactosyltransferase, 1	6	7794842	7822047
ENSMUSG00000068794	36.3781	44.998	26.9473	31.7542	12.475	11.9815	NA	collagen, type XXVIII, alpha 1	6	7947808	8142617
ENSMUSG00000042447	622.696	698.891	696.718	647.792	609.676	568.41	NA	missing oocyte, meiosis regulator, homolog (Drosophila)	6	8159222	8186274
ENSMUSG00000012483	143.58	98.7982	65.1313	89.4779	84.0644	85.3823	NA	replication protein A3	6	8205936	8209173
ENSMUSG00000089862	173.481	224.137	255.088	270.943	258.76	307.316	NA	NA	6	8209288	8547480
ENSMUSG00000029638	96.5009	96.5684	99.5323	73.4561	103.595	121.457	NA	glucocorticoid induced transcript 1	6	8459600	8547548
ENSMUSG00000062995	314.081	482.431	587.171	574.979	654.667	649.788	NA	islet cell autoantigen 1	6	8580527	8728488
ENSMUSG00000046178	510.426	647.432	778.037	810.746	605.036	605.891	NA	neurexophilin 1	6	8898431	9199032
ENSMUSG00000029632	927.847	1104.85	1106.02	1402.99	2468.17	2403.44	NA	NADH dehydrogenase (ubiquinone) 1 alpha subcomplex, 4	6	11850373	11857446
ENSMUSG00000029629	1908.05	1905.11	2077.91	1699.58	924.228	871.787	NA	PHD finger protein 14	6	11857809	12031197
ENSMUSG00000057223	0	0	0	0.37781	0	0	NA	NA	6	12049518	12059583
ENSMUSG00000032625	1553.13	1136.58	1300.17	1414.75	1123.89	1125.55	NA	thrombospondin, type I, domain containing 7A	6	12261610	12699410
ENSMUSG00000029571	1211.1	1658.9	1817.04	2342.53	3819.91	3296.44	NA	transmembrane protein 106B	6	13019759	13039269
ENSMUSG00000079679	1.52898	1.77656	0.899562	1.76432	3.21261	2.62464	NA	von Willebrand factor D and EGF domains	6	13135613	13174965
ENSMUSG00000091978	0	0	0	0	0	0	NA	NA	6	13213695	13214600
ENSMUSG00000029569	478.516	472.701	435.15	433.967	520.936	426.132	NA	transmembrane protein 168	6	13530687	13558100
ENSMUSG00000042742	622.251	614.118	574.664	570.04	912.169	796.498	NA	RIKEN cDNA B630005N14 gene	6	13575677	13627966
ENSMUSG00000048216	1416.75	1954.9	1747.29	1426.06	990.347	780.733	NA	G protein-coupled receptor 85	6	13784458	13789942
ENSMUSG00000052419	172.518	199.167	218.157	282.615	208.8	194.103	NA	NA	6	13817735	13821518
ENSMUSG00000092059	0	0.958386	0	0.37781	0	0	NA	NA	6	13956077	13956358
ENSMUSG00000042717	0.442714	0	0.538156	0.504351	10.3622	10.927	NA	protein phosphatase 1, regulatory (inhibitor) subunit 3A	6	14663822	14705274
ENSMUSG00000029563	1686.14	1531.01	1710.11	1220.65	358.811	418.93	NA	forkhead box P2	6	14851349	15391977
ENSMUSG00000041390	100.2	73.2867	65.9425	83.4311	70.0805	82.4108	NA	MyoD family inhibitor domain containing	6	15670661	15752169
ENSMUSG00000029553	2.21357	3.23047	2.96381	2.64648	1.85778	2.19431	NA	transcription factor EC	6	16783381	16848441
ENSMUSG00000029552	344.071	390.293	243.819	225.285	40.1275	32.054	NA	testis derived transcript	6	17015149	17055828
ENSMUSG00000000058	112.715	204.451	176.303	383.185	551.348	617.687	NA	caveolin 2	6	17231185	17239115
ENSMUSG00000007655	234.33	413.137	225.024	275.843	258.496	245.519	NA	caveolin 1, caveolae protein	6	17256335	17291452
ENSMUSG00000009376	135.693	431.248	416.015	723.689	307.216	261.234	NA	met proto-oncogene	6	17413800	17523980
ENSMUSG00000015733	1947.19	2293.93	2286.16	2770.58	5063.48	4299.66	NA	capping protein (actin filament) muscle Z-line, alpha 2	6	17586234	17616972
ENSMUSG00000029534	530.704	579.485	452.947	380.027	287.753	334.381	NA	suppression of tumorigenicity 7	6	17642933	17893025
ENSMUSG00000010797	1.20721	6.7087	7.45371	6.04677	55.8008	59.4151	NA	wingless-related MMTV integration site 2	6	17938940	17980585
ENSMUSG00000010796	0	0	0	0	0	0	NA	ankyrin repeat, SAM and basic leucine zipper domain containing 1	6	18000964	18059061
ENSMUSG00000041301	19.2354	50.4583	48.6819	34.2759	14.3328	22.5886	NA	cystic fibrosis transmembrane conductance regulator	6	18120687	18272768
ENSMUSG00000000416	1010.58	1049.69	1043.7	749.798	863.546	1040.38	NA	cortactin binding protein 2	6	18316478	18465338
ENSMUSG00000044155	408.649	317.99	294.38	258.576	270.711	211.204	NA	N(alpha)-acetyltransferase 38, NatC auxiliary subunit	6	18798579	18805751
ENSMUSG00000029517	0.885429	0	0.987937	0.37781	1.44868	1.74265	NA	ankyrin repeat domain 7	6	18816318	18829586
ENSMUSG00000060882	856.848	1526.64	1943.27	2419.07	2371.33	2083.92	NA	potassium voltage-gated channel, Shal-related family, member 2	6	21165503	21679805
ENSMUSG00000029669	314.733	337.371	274.759	430.22	561.078	484.198	NA	tetraspanin 12	6	21721395	21802515
ENSMUSG00000029670	252.354	229.219	246.083	227.598	260.589	239.645	NA	inhibitor of growth family, member 3	6	21899571	21926038
ENSMUSG00000062980	147.208	92.6138	50.208	66.4297	94.4867	137.596	NA	RIKEN cDNA A430107O13 gene	6	21935916	22206404
ENSMUSG00000029671	4.18527	3.09026	0.538156	8.31908	10.5499	13.4237	NA	wingless-related MMTV integration site 16	6	22238227	22248522
ENSMUSG00000029672	813.316	1180.86	1367.77	1852.75	1393.34	1059.67	NA	family with sequence similarity 3, member C	6	22256520	22306243
ENSMUSG00000068748	3144.34	4987.21	5231.08	6805.73	2484.46	2514.32	NA	protein tyrosine phosphatase, receptor type Z, polypeptide 1	6	22825502	23002916
ENSMUSG00000029695	14.2057	15.797	13.8232	10.5841	77.9136	81.2728	NA	aminoadipate-semialdehyde synthase	6	23022173	23082986
ENSMUSG00000029697	44.7077	30.5377	47.5819	4.28245	3.65536	3.95829	NA	Fez family zinc finger 1	6	23195047	23198264
ENSMUSG00000017978	324.63	628.689	768.031	1437.84	4550.06	3460.11	NA	Ca2+-dependent activator protein for secretion 2	6	23212773	23789421
ENSMUSG00000051956	0.885429	2.02432	2.51403	4.15772	2.26689	4.19478	NA	ring finger protein 133	6	23598869	23600305
ENSMUSG00000078179	0.885429	0.710625	1.43772	3.15084	0.945719	5.76493	NA	ring finger protein 148	6	23603898	23605136
ENSMUSG00000043865	0	0	0	0	0	0	NA	taste receptor, type 2, member 118	6	23919161	23920060
ENSMUSG00000029700	14.7694	23.1837	18.4094	23.6918	21.9516	20.8886	NA	solute carrier family 13 (sodium/sulfate symporters), member 1	6	24038283	24118092
ENSMUSG00000046192	57.4233	49.0697	42.1199	33.9018	50.3019	58.7946	NA	IQ motif and ubiquitin domain containing	6	24394865	24465067
ENSMUSG00000023089	246.03	293.31	293.624	321.734	429.839	446.783	NA	NADH dehydrogenase (ubiquinone) 1 alpha subcomplex, 5	6	24468666	24478013
ENSMUSG00000029685	1.9717	2.51984	4.04012	1.13343	1.03958	1.09715	NA	ankyrin repeat and SOCS box-containing 15	6	24478144	24523164
ENSMUSG00000091097	0	0	0	0	0	0	NA	NA	6	24509557	24512070
ENSMUSG00000029683	0	0	0	1.38651	1.44868	0.215165	NA	leiomodin 2 (cardiac)	6	24547771	24555414
ENSMUSG00000029684	491.266	413.98	463.243	454.68	1064.86	1113.77	NA	Wiskott-Aldrich syndrome-like (human)	6	24563805	24615009
ENSMUSG00000029679	0	0	0.538156	0	1.35482	0.645494	NA	hyaluronoglucosaminidase 6	6	24683245	24695452
ENSMUSG00000029680	0	0.603073	0.538156	0	0	0	NA	hyaluronoglucosaminidase 4	6	24698329	24717662
ENSMUSG00000029682	0	0	0	0	0	0	NA	sperm adhesion molecule 1	6	24745824	24751048
ENSMUSG00000029678	0	0	0	0	0	0	NA	hyaluronoglucosaminidase 5	6	24825871	24841958
ENSMUSG00000048022	91.9528	226.044	260.615	573.524	1098.53	1242.3	NA	transmembrane protein 229A	6	24901141	24906297
ENSMUSG00000039904	59.0343	124.632	125.918	210.553	1089.27	1131.44	NA	G protein-coupled receptor 37	6	25616894	25640729
ENSMUSG00000029676	375.21	301.411	269.57	301.184	380.63	365.469	NA	protection of telomeres 1A	6	25693737	25759246
ENSMUSG00000024211	189.579	316.573	292.276	447.473	309.772	331.275	NA	glutamate receptor, metabotropic 8	6	27225121	28085178
ENSMUSG00000043340	2.97806	3.12292	3.14056	4.40899	10.5233	7.03458	NA	RIKEN cDNA 6530409C15 gene	6	28165555	28210862
ENSMUSG00000039841	358.346	293.633	303.215	273.725	332.655	327.327	NA	zinc finger protein 800	6	28189931	28348005
ENSMUSG00000029708	442.019	365.46	388.387	348.786	473.783	454.31	NA	golgi coiled coil 1	6	28366091	28378390
ENSMUSG00000020440	745.649	841.706	817.161	907.269	1301.53	1146.96	NA	ADP-ribosylation factor 5	6	28373560	28376602
ENSMUSG00000029707	2.85713	2.6274	3.50197	2.51994	0.818203	1.29099	NA	fascin homolog 3, actin-bundling protein, testicular (Strongylocentrotus purpuratus)	6	28377789	28388622
ENSMUSG00000029706	0.442714	0	0.538156	0.504351	0	0	NA	paired box gene 4	6	28392334	28399353
ENSMUSG00000001424	1507.11	1519.14	1521.78	1617.15	1408.97	1329.95	NA	staphylococcal nuclease and tudor domain containing 1	6	28425139	28885162
ENSMUSG00000049939	373.117	505.53	540.553	656.886	1075.65	1091.16	NA	leucine rich repeat containing 4	6	28611831	28781747
ENSMUSG00000059201	0	0	0	0	0	0.215165	NA	leptin	6	29010220	29023877
ENSMUSG00000029701	766.638	693.992	501.154	570.203	511.617	546.614	NA	RNA binding motif protein 28	6	29073573	29115006
ENSMUSG00000079654	78.0278	122.983	203.531	166.465	21.0998	23.1895	NA	proline-rich transmembrane protein 4	6	29119232	29129584
ENSMUSG00000003500	293.323	424.974	415.888	577.833	303.784	358.498	NA	inosine 5-phosphate dehydrogenase 1	6	29150434	29166364
ENSMUSG00000043421	64.2259	78.1997	69.9431	46.8702	42.5219	49.0909	NA	hypoxia inducible lipid droplet associated	6	29222488	29225446
ENSMUSG00000079652	3.50068	5.4699	1.43772	1.25997	0	1.33365	NA	family with sequence similarity 71, member F2	6	29229593	29240680
ENSMUSG00000039742	0	0.355313	0	0	0.31524	0	NA	family with sequence similarity 71, member F1	6	29269140	29286021
ENSMUSG00000029767	2306.63	2062.64	1899.54	2291.31	2085.15	1764.53	NA	calumenin	6	29298069	29327110
ENSMUSG00000058831	2.09263	0	1.61447	0.882161	1.44868	1.09715	NA	opsin 1 (cone pigments), short-wave-sensitive (color blindness, tritan)	6	29326671	29338468
ENSMUSG00000029769	598.111	595.666	623.097	707.332	819.546	759.728	NA	coiled-coil domain containing 136	6	29346309	29376955
ENSMUSG00000068699	405.526	247.344	175.588	175.073	64.4204	78.9951	NA	filamin C, gamma	6	29383153	29411888
ENSMUSG00000004285	279.398	322.701	316.798	322.079	526.109	564.013	NA	ATPase, H+ transporting, lysosomal V1 subunit F	6	29417718	29420512
ENSMUSG00000090685	2.09263	3.09026	3.23684	0.882161	0.31524	0.645494	NA	predicted gene 9047	6	29421437	29423465
ENSMUSG00000059022	107.204	152.379	115.885	92.475	17.2301	12.9933	NA	kielin/chordin-like protein	6	29423162	29457952
ENSMUSG00000029771	17.1838	15.2266	20.0318	26.3329	70.0805	51.0701	NA	interferon regulatory factor 5	6	29476625	29491869
ENSMUSG00000012535	1742.07	1606.2	1612.51	1448.76	1256.58	1257.82	NA	transportin 3	6	29490827	29559887
ENSMUSG00000001763	64.8673	70.9301	84.4086	96.9076	198.941	212.083	NA	tetraspanin 33	6	29644222	29668559
ENSMUSG00000001761	631.364	423.896	362.276	485.838	345.782	365.608	NA	smoothened homolog (Drosophila)	6	29685694	29711365
ENSMUSG00000029772	608.052	803.473	825.104	1095.45	2501.02	2640.7	NA	S-adenosylhomocysteine hydrolase-like 2	6	29718011	29862310
ENSMUSG00000039629	121.003	305.623	367.424	729.667	1394.75	1074.3	NA	family with sequence similarity 40, member B	6	29867013	29909681
ENSMUSG00000058440	680.052	566.828	466.595	448.096	382.993	391.413	NA	nuclear respiratory factor 1	6	29997988	30103458
ENSMUSG00000039159	875.06	824.636	937.35	1059.23	1027.48	1023.07	NA	ubiquitin-conjugating enzyme E2H	6	30161289	30254539
ENSMUSG00000039130	396.948	405.416	367.995	323.453	286.961	283.167	NA	zinc finger, C3HC type 1	6	30316380	30341028
ENSMUSG00000029775	2487.31	2666.1	3075.51	2710.3	2630.26	2100.87	NA	kelch domain containing 10	6	30351868	30405179
ENSMUSG00000029782	462.25	382.674	405.801	332.192	349.82	337.478	NA	transmembrane protein 209	6	30429053	30459783
ENSMUSG00000029784	6.59968	4.89948	3.95175	3.27738	4.7215	4.88294	NA	RIKEN cDNA 1700025E21 gene	6	30459849	30470254
ENSMUSG00000071553	13.1994	25.8438	27.0278	23.1838	18.3972	16.2208	NA	carboxypeptidase A2, pancreatic	6	30491582	30514476
ENSMUSG00000039070	10.4221	6.10563	5.92762	4.15772	3.08509	3.52796	NA	carboxypeptidase A4	6	30518369	30542418
ENSMUSG00000029788	0.442714	1.56146	1.07631	0	0	0.45166	NA	carboxypeptidase A5	6	30561010	30581745
ENSMUSG00000054446	0.764492	3.23047	1.07631	0.37781	0.31524	0	NA	carboxypeptidase A1, pancreatic	6	30589218	30595363
ENSMUSG00000029790	182.936	157.826	130.247	123.378	84.5744	76.6904	NA	testis specific gene A14	6	30603457	30643749
ENSMUSG00000051855	1928.69	1406.48	1398.85	1293.67	469.885	523.972	NA	mesoderm specific transcript	6	30673547	30698457
ENSMUSG00000025607	1150.87	1016.64	1027.76	971.507	1972.3	1786.97	NA	coatomer protein complex, subunit gamma 2	6	30697554	30846794
ENSMUSG00000039032	1.64992	2.73495	2.96381	2.3934	0.409102	0.90332	NA	testis specific gene A13	6	30846981	30865573
ENSMUSG00000073209	0.442714	3.44557	4.57828	8.82161	3.02488	2.19431	NA	Kruppel-like factor 14	6	30906021	30908990
ENSMUSG00000044471	0.885429	3.47823	8.6184	9.95323	122.856	193.844	NA	NA	6	31115523	31168433
ENSMUSG00000025609	1347.57	1407.83	1439.61	1316.44	1968.78	2022.01	NA	muskelin 1, intracellular mediator containing kelch motifs	6	31348735	31466811
ENSMUSG00000025608	394.003	325.236	280.243	223.939	264.293	293.384	NA	podocalyxin-like	6	31469488	31513981
ENSMUSG00000029766	0	0	0	0.37781	0	0	NA	RIKEN cDNA 1700012A03 gene	6	32000246	32008921
ENSMUSG00000029765	2799.03	3363.37	3079.81	2557.29	1838.96	2036.56	NA	plexin A4	6	32094565	32538192
ENSMUSG00000053768	622.419	674.93	570.568	809.663	1019.7	902.094	NA	coiled-coil-helix-coiled-coil-helix domain containing 3	6	32740976	33010260
ENSMUSG00000029763	1939.4	1815.63	1561.07	1590.55	1781.76	1699.25	NA	exocyst complex component 4	6	33199085	33923979
ENSMUSG00000056215	15.5339	25.1005	30.8186	25.3241	26.8343	29.3421	NA	leucine-rich repeats and guanylate kinase domain containing	6	33979448	34084034
ENSMUSG00000018999	398.918	457.995	456.337	462.068	622.126	682.483	NA	solute carrier family 35, member B4	6	34103380	34127111
ENSMUSG00000001642	219.962	251.299	230.166	270.039	244.199	276.392	NA	aldo-keto reductase family 1, member B3 (aldose reductase)	6	34253934	34267497
ENSMUSG00000029762	13.8839	10.6498	15.6302	9.0747	6.33135	8.69191	NA	aldo-keto reductase family 1, member B8	6	34304119	34318463
ENSMUSG00000061758	27.5649	46.3252	59.0032	104.603	108.129	123.612	NA	aldo-keto reductase family 1, member B10 (aldose reductase)	6	34334218	34346950
ENSMUSG00000052131	0.442714	3.09026	0.538156	1.25997	3.02488	1.93648	NA	aldo-keto reductase family 1, member B7	6	34362334	34373142
ENSMUSG00000038871	644.229	546.282	562.916	652.459	1101.82	833.881	NA	2,3-bisphosphoglycerate mutase	6	34426207	34455613
ENSMUSG00000029761	626.352	479.851	341.495	537.582	268.658	251.625	NA	caldesmon 1	6	34548500	34725473
ENSMUSG00000079612	0	0	0	0	0	0	NA	NA	6	34619155	34640124
ENSMUSG00000060411	0	0	0	0	0.630479	0	NA	NA	6	34676831	34676905
ENSMUSG00000038836	121.049	167.036	188.865	166.965	182.199	156.459	NA	ATP/GTP binding protein-like 3	6	34730432	34809459
ENSMUSG00000057137	11.7913	10.1869	14.273	11.0885	27.1495	33.2151	NA	transmembrane protein 140	6	34813146	34824946
ENSMUSG00000046806	88.1304	79.738	56.2319	61.1095	43.2799	46.0786	NA	RIKEN cDNA 3110062M04 gene	6	34821771	34828060
ENSMUSG00000058486	251.31	283.127	332.019	276.713	337.687	348.624	NA	WD repeat domain 91	6	34830426	34860876
ENSMUSG00000029848	0	0	0	0	0	0	NA	stimulated by retinoic acid gene 8	6	34870163	34889342
ENSMUSG00000029847	4.38611	11.1127	7.72675	10.2063	2.48826	4.81894	NA	RIKEN cDNA 2010107G12 gene	6	34895278	34929054
ENSMUSG00000038784	477.704	486.429	450.73	408.048	463.809	488.017	NA	CCR4-NOT transcription complex, subunit 4	6	34972066	35083737
ENSMUSG00000038759	1655.53	1438.74	1253.69	1052.56	660.743	620.736	NA	nucleoporin 205	6	35127445	35197590
ENSMUSG00000029843	62.2154	100.314	52.4648	118.118	140.012	185.847	NA	solute carrier family 13 (sodium/sulfate symporters), member 4	6	35217957	35258131
ENSMUSG00000047420	5.51341	3.72599	2.15262	12.6052	26.2977	28.9137	NA	family with sequence similarity 180, member A	6	35262746	35276141
ENSMUSG00000029840	3202.6	4132.52	4370.61	4953.97	5205.19	4862.88	NA	myotrophin	6	35458906	35489888
ENSMUSG00000045613	180.884	357.541	380.556	583.669	607.616	457.479	NA	cholinergic receptor, muscarinic 2, cardiac	6	36338084	36478414
ENSMUSG00000029838	3408.72	4426.75	4842.58	6067.58	3614.57	3417.92	NA	pleiotrophin	6	36665663	36761361
ENSMUSG00000038665	698.201	907.996	818.79	833.161	1676.43	2013.15	NA	diacylglycerol kinase, iota	6	36796022	37250184
ENSMUSG00000029837	0	0.603073	0.538156	0	0.409102	0	NA	NA	6	36887048	36935777
ENSMUSG00000038648	105.152	86.3257	59.0269	75.9979	99.805	109.217	NA	cAMP responsive element binding protein 3-like 2	6	37277255	37392146
ENSMUSG00000038641	0.442714	1.66901	0.538156	0.504351	1.5762	0.215165	NA	aldo-keto reductase family 1, member D1	6	37480173	37518815
ENSMUSG00000029833	1305.59	1136.53	1173.25	867.103	610.328	616.964	NA	tripartite motif-containing 24	6	37820811	37916296
ENSMUSG00000029830	4.18527	2.27208	4.85131	2.26867	1.35482	1.54881	NA	SV2 related protein homolog (rat)-like	6	37933739	37996996
ENSMUSG00000038600	3.62162	3.69333	5.21272	5.54424	2.99123	3.54929	NA	ATPase, H+ transporting, lysosomal V0 subunit A4	6	37998483	38074586
ENSMUSG00000029829	0.442714	0	0	0	0	0	NA	transmembrane protein 213	6	38059353	38065806
ENSMUSG00000063455	1373.2	1356.79	1434.01	879.511	507.813	602.005	NA	RIKEN cDNA D630045J12 gene	6	38073174	38204009
ENSMUSG00000047749	427.966	266.227	246.855	145.045	42.0791	55.4141	NA	zinc finger CCCH-type, antiviral 1-like	6	38237396	38249259
ENSMUSG00000029826	45.917	62.8424	55.8705	92.5022	130.992	101.454	NA	zinc finger CCCH type, antiviral 1	6	38255286	38304603
ENSMUSG00000056832	248.412	222.566	210.824	173.755	163.326	160.65	NA	tetratricopeptide repeat domain 26	6	38331469	38377647
ENSMUSG00000038538	1304.31	1118.29	1082.04	949.015	809.824	995.101	NA	ubinuclein 2	6	38383925	38474825
ENSMUSG00000019689	62.8978	87.3533	84.6975	96.2749	63.9971	65.2477	NA	RIKEN cDNA 1110001J03 gene	6	38483502	38489449
ENSMUSG00000029823	2487.52	2353.54	2397.16	2007.15	1871.96	1989.24	NA	LUC7-like 2 (S. cerevisiae)	6	38501334	38559470
ENSMUSG00000071537	0.442714	1.06594	0.538156	1.89086	2.58213	3.03364	NA	killer cell lectin-like receptor subfamily G, member 2	6	38576660	38587239
ENSMUSG00000079598	144.351	281.322	355.722	506.169	635.694	509.977	NA	C-type lectin domain family, member L	6	38613069	38630863
ENSMUSG00000061436	1007.23	768.427	789.782	819.257	413.812	570.129	NA	homeodomain interacting protein kinase 2	6	38644389	38826189
ENSMUSG00000029925	17.0629	19.2426	16.3372	20.2879	38.3635	44.4445	NA	thromboxane A synthase 1, platelet	6	38825403	39034584
ENSMUSG00000038507	60.4035	59.7848	70.3203	100.691	171.074	141.079	NA	poly (ADP-ribose) polymerase family, member 12	6	39036409	39068348
ENSMUSG00000042599	883.621	542.131	456.216	501.809	1745.7	1792.59	NA	jumonji C domain-containing histone demethylase 1 homolog D (S. cerevisiae)	6	39086622	39156788
ENSMUSG00000029924	672.843	676.073	751.312	630.665	670.414	637.701	NA	solute carrier family 37 (glycerol-3-phosphate transporter), member 3	6	39284769	39327706
ENSMUSG00000029923	0.764492	0.603073	0.538156	0	0.630479	1.31232	NA	RAB19, member RAS oncogene family	6	39331174	39340379
ENSMUSG00000029922	2311.98	2189.22	2277.01	1811.03	2278.34	1823.5	NA	makorin, ring finger protein, 1	6	39347803	39370461
ENSMUSG00000068601	16.2984	19.7285	18.755	14.1073	34.4531	24.3294	NA	NA	6	39369886	39371293
ENSMUSG00000038456	399.721	314.418	355.086	400.387	212.879	226.502	NA	DENN/MADD domain containing 2A	6	39412377	39507866
ENSMUSG00000046947	159.999	184.824	203.162	170.617	177.699	204.17	NA	aarF domain containing kinase 2	6	39523872	39546594
ENSMUSG00000002416	502.34	671.095	538.258	692.216	902.641	900.049	NA	NADH dehydrogenase (ubiquinone) 1 beta subcomplex, 2	6	39542573	39553381
ENSMUSG00000002413	1102.81	1288.66	1442.53	1395.17	2129.35	2328.49	NA	Braf transforming gene	6	39553236	39675462
ENSMUSG00000029918	157.546	189.995	142.463	178.417	243.501	280.992	NA	mitochondrial ribosomal protein S33	6	39751803	39760987
ENSMUSG00000057716	446.195	562.33	756.668	874.598	581.986	576.794	NA	predicted gene 5567	6	40060252	40198352
ENSMUSG00000029916	322.698	551.321	519.928	617.653	620.074	557.355	NA	acylglycerol kinase	6	40275477	40346761
ENSMUSG00000037172	1667.3	1065.64	950.683	1274.98	3553.7	3115.59	NA	RIKEN cDNA E330009J07 gene	6	40351374	40386134
ENSMUSG00000037159	0.764492	1.91677	1.97587	2.77303	1.44868	1.29099	NA	WEE1 homolog 2 (S. pombe)	6	40392862	40416812
ENSMUSG00000029911	234.606	194.525	181.667	167.862	143.092	127.138	NA	single-stranded DNA binding protein 1	6	40421351	40431822
ENSMUSG00000052850	5.0707	4.89948	1.07631	3.27556	1.54254	0.881989	NA	taste receptor, type 2, member 137	6	40441237	40442238
ENSMUSG00000037140	0	2.27208	1.07631	0.882161	1.2273	1.31232	NA	taste receptor, type 2, member 108	6	40443591	40444484
ENSMUSG00000029909	0	0.355313	0	0	0	0	NA	protease, serine, 37	6	40464823	40469507
ENSMUSG00000068259	0	0	0	0	0	0.215165	NA	olfactory receptor 461	6	40494035	40494976
ENSMUSG00000045514	0	0	0.538156	0	0	0	NA	olfactory receptor 460	6	40521356	40522416
ENSMUSG00000029915	1.20721	2.6274	2.87544	10.4594	22.0118	28.5241	NA	C-type lectin domain family 5, member a	6	40524893	40535820
ENSMUSG00000058250	0	0	0	0	0	0	NA	taste receptor, type 2, member 138	6	40562314	40563309
ENSMUSG00000068587	8.12866	10.9725	7.81512	7.18383	2.17302	3.0763	NA	maltase-glucoamylase	6	40578830	40719122
ENSMUSG00000029885	0	0	0	0	0	0	NA	monooxygenase, DBH-like 2	6	40828793	40837493
ENSMUSG00000051936	0	0	0	0	0	0	NA	protease, serine 58	6	40845261	40850386
ENSMUSG00000029883	0	0	0	0	0	0	NA	RIKEN cDNA 1700074P13 gene	6	40870436	40890556
ENSMUSG00000063252	0	0	0	0	0	0	NA	NA	6	40898462	40904352
ENSMUSG00000036996	0	0	0	0	0	0	NA	NA	6	40914768	40918437
ENSMUSG00000090480	0	0	0	0	0	0	NA	NA	6	40945821	40949478
ENSMUSG00000029882	0	0	0	0	0.409102	0.430329	NA	RIKEN cDNA 2210010C04 gene	6	40980267	40985508
ENSMUSG00000054106	0	0	0	0	0	0	NA	trypsin 4	6	41252268	41255531
ENSMUSG00000036938	0	1.20615	0.449781	0.504351	0	0	NA	trypsin 5	6	41261232	41266840
ENSMUSG00000071521	0	0	0	0	0	0	NA	predicted pseudogene 5409	6	41304104	41307943
ENSMUSG00000071519	0	0	0	0	0	0	NA	protease, serine, 3	6	41323794	41327677
ENSMUSG00000058119	0	0	0	0.37781	0	0	NA	predicted gene 5771	6	41342355	41347255
ENSMUSG00000071517	0	0	0	0	1.95165	1.76398	NA	predicted gene 10334	6	41392213	41396096
ENSMUSG00000062751	0	0	0	0	0	0	NA	protease, serine, 1 (trypsin 1)	6	41408931	41413785
ENSMUSG00000057163	0	0.603073	0	0	0	0.45166	NA	protease, serine, 2	6	41471786	41475078
ENSMUSG00000029869	540.489	756.598	814.87	943.667	1222.89	1259.06	NA	Eph receptor B6	6	41555481	41570508
ENSMUSG00000029868	3.099	6.98912	5.11643	9.19398	20.3152	28.5668	NA	transient receptor potential cation channel, subfamily V, member 6	6	41570620	41586404
ENSMUSG00000036899	0	0	0	0	0	0	NA	transient receptor potential cation channel, subfamily V, member 5	6	41602172	41630768
ENSMUSG00000029867	0	0	0	0	0	0	NA	RIKEN cDNA 1700034O15 gene	6	41634430	41635716
ENSMUSG00000029866	19.1944	3.83354	0.987937	0.882161	5.70087	0	NA	Kell blood group	6	41636329	41654338
ENSMUSG00000045479	0	0	0	0	0	0	NA	olfactory receptor 459	6	41721257	41722365
ENSMUSG00000058499	0	0	0	0	0	0	NA	prolactin induced protein	6	41797548	41802061
ENSMUSG00000014104	0	0	0	0	0	0	NA	seminal vesicle antigen-like 2	6	41802988	41814412
ENSMUSG00000029865	0	0	0	0	0	0	NA	seminal vesicle antigen-like 1	6	41901629	41906097
ENSMUSG00000062833	0	0	0	0	0	0	NA	seminal vesicle antigen-like 3	6	41918139	41923089
ENSMUSG00000023289	0	0	0	0	0	0	NA	seminal vesicle antigen	6	41988393	41992850
ENSMUSG00000047102	0	0	0	0	0	0	NA	taste receptor, type 2, member 139	6	42090935	42091894
ENSMUSG00000051917	0	0	0	0	0	0	NA	taste receptor, type 2, member 144	6	42165327	42166286
ENSMUSG00000029864	33.9637	28.7612	22.2728	42.3474	84.4735	74.843	NA	glutathione S-transferase kappa 1	6	42195934	42200440
ENSMUSG00000071506	1.20721	0.603073	0.987937	0.504351	0	0	NA	transmembrane protein 139	6	42211969	42214554
ENSMUSG00000029863	674.215	521.275	463.172	335.818	224.339	204.236	NA	caspase 2	6	42214984	42232507
ENSMUSG00000029862	61.6906	59.3642	53.0914	36.4126	40.9793	41.0445	NA	chloride channel 1	6	42236684	42265755
ENSMUSG00000029861	651.073	912.498	984.339	1339.64	3059.37	2549.36	NA	family with sequence similarity 131, member B	6	42265311	42274642
ENSMUSG00000029860	168.16	135.639	159.426	180.747	124.454	125.87	NA	zyxin	6	42299827	42310145
ENSMUSG00000029859	10.1004	8.66771	18.048	15.6204	11.9384	7.24975	NA	Eph receptor A1	6	42308486	42323267
ENSMUSG00000046652	0.764492	0.355313	0	0.37781	0.409102	0.215165	NA	taste receptor, type 2, member 143	6	42350237	42351118
ENSMUSG00000056203	0	0	0	0	1.03958	0.645494	NA	taste receptor, type 2, member 135	6	42355433	42356525
ENSMUSG00000048284	0	0	0	0	1.2273	0.90332	NA	taste receptor, type 2, member 126	6	42384534	42385463
ENSMUSG00000068574	0	0	0	0	0	0	NA	olfactory receptor 458	6	42410075	42411016
ENSMUSG00000091983	0	0	0	0	0.409102	0.215165	NA	olfactory receptor 457	6	42421161	42422199
ENSMUSG00000090631	0	0	0	0.37781	0.409102	0	NA	olfactory receptor 456	6	42436162	42437213
ENSMUSG00000078177	0	0	0	0	0.31524	0	NA	NA	6	42469515	42470324
ENSMUSG00000071494	0	0	0	0	0.31524	0.215165	NA	olfactory receptor 455	6	42488066	42489443
ENSMUSG00000018656	0	0	0	0.882161	0	0.215165	NA	family with sequence similarity 115, member E	6	42534865	42547691
ENSMUSG00000029851	51.9919	59.7426	57.1078	66.1621	34.1981	23.5346	NA	family with sequence similarity 115, member C	6	42573018	42595253
ENSMUSG00000036667	6393.34	7194.3	7566.98	7511.19	5967.45	5437.69	NA	family with sequence similarity 115, member A	6	42618001	42660071
ENSMUSG00000048504	0	0	0	0	0	0	NA	NA	6	42694038	42694991
ENSMUSG00000061091	0	0	0	0	0	0	NA	NA	6	42712053	42713006
ENSMUSG00000057108	0	0	0	0	0	0	NA	NA	6	42740040	42740993
ENSMUSG00000054431	0	0	0	0	0	0	NA	olfactory receptor 450	6	42767472	42768404
ENSMUSG00000049168	0	0	0	0	0	0	NA	olfactory receptor 449	6	42787851	42788887
ENSMUSG00000043119	0	0	0	0	0	0	NA	olfactory receptor 448	6	42846452	42847384
ENSMUSG00000045708	0	0	0	0	0	0	NA	olfactory receptor 447	6	42861524	42862456
ENSMUSG00000073111	0	0	0	0	0	0	NA	olfactory receptor 446	6	42877232	42878158
ENSMUSG00000073110	0	0	0	0	0	0	NA	olfactory receptor 444	6	42905458	42906507
ENSMUSG00000091386	0	0.710625	0.538156	0.882161	0.630479	0.45166	NA	NA	6	43044434	43045348
ENSMUSG00000073109	0	0	0	0	0	0	NA	NA	6	43065698	43066697
ENSMUSG00000073108	0	0	0	0.504351	0	0	NA	NA	6	43103261	43104260
ENSMUSG00000071481	0	0	0.538156	0	0	0	NA	olfactory receptor 437	6	43117009	43118026
ENSMUSG00000043605	0	0.355313	0	0	0	0	NA	olfactory receptor 13	6	43123951	43125004
ENSMUSG00000048693	0	0	0	0	0	0	NA	olfactory receptor 435	6	43151645	43152586
ENSMUSG00000059411	0	0	0	0	0	0	NA	olfactory receptor 434	6	43166882	43167937
ENSMUSG00000061210	0	0	0	0	0	0	NA	olfactory receptor 47	6	43185577	43186635
ENSMUSG00000033542	99.9994	67.9666	60.7218	83.8108	50.9253	52.4677	NA	Rho guanine nucleotide exchange factor (GEF) 5	6	43215643	43239319
ENSMUSG00000029736	1.52898	0	0.987937	0.37781	0	0	NA	NOBOX oogenesis homeobox	6	43253673	43259561
ENSMUSG00000029735	52.9983	56.3815	57.8464	71.4532	46.6536	56.8776	NA	thiamine pyrophosphokinase	6	43295000	43616277
ENSMUSG00000039419	1353.2	1642.47	1944.49	2157.31	2040.87	2062.67	NA	contactin associated protein-like 2	6	45010060	47251368
ENSMUSG00000079575	61.8504	36.1152	26.3287	29.4928	15.305	13.4023	NA	NA	6	46479350	46480921
ENSMUSG00000029686	2399.67	2082.32	2157.01	2056.12	2723.13	2431.58	NA	cullin 1	6	47403397	47476138
ENSMUSG00000029687	1703.6	935.779	837.812	498.208	239.993	224.977	NA	enhancer of zeste homolog 2 (Drosophila)	6	47480273	47545340
ENSMUSG00000025823	1843.81	1542.14	1082.74	1342.48	1452.19	1248.46	NA	protein disulfide isomerase associated 4	6	47746141	47763511
ENSMUSG00000051499	290.06	289.233	312.911	201.35	108.88	100.741	NA	zinc finger protein 786	6	47769265	47780866
ENSMUSG00000062519	364.827	371.5	350.805	292.845	203.535	212.216	NA	zinc finger protein 398	6	47785660	47818256
ENSMUSG00000025821	868.821	854.668	881.455	754.02	500.401	405.736	NA	zinc finger protein 282	6	47827203	47858484
ENSMUSG00000052763	231.708	149.696	182.993	129.927	138.833	136.301	NA	Zinc finger protein 212	6	47870475	47882638
ENSMUSG00000045466	261.087	321.795	383.247	310.844	292.489	251.52	NA	zinc finger protein 956	6	47903389	47915299
ENSMUSG00000071477	310.582	319.584	391.431	352.713	297.152	282.903	NA	zinc finger protein 777	6	47974187	47998910
ENSMUSG00000057691	441.816	428.759	452.29	387.466	392.616	348.409	NA	zinc finger protein 746	6	48012394	48036592
ENSMUSG00000042810	578.552	634.534	659.981	496.557	353.449	425.834	NA	KRAB-A domain containing 1	6	48345585	48369854
ENSMUSG00000068551	183.34	213.441	224.51	190.162	161.429	154.439	NA	zinc finger protein 467	6	48377696	48395824
ENSMUSG00000029797	9.57774	23.1933	60.4093	31.5192	56.5128	51.4559	NA	SCO-spondin	6	48398228	48451249
ENSMUSG00000039347	664.46	1204.88	1411.83	1951.45	1807.29	1815.03	NA	ATPase, H+ transporting, lysosomal V0 subunit E2	6	48487568	48491797
ENSMUSG00000073096	133.924	131.692	137.274	118.334	109.57	125.523	NA	leucine rich repeat containing 61	6	48504795	48520721
ENSMUSG00000009281	13.5622	18.144	25.7747	34.1512	96.9679	91.0174	NA	retinoic acid receptor responder (tazarotene induced) 2	6	48519697	48522669
ENSMUSG00000052730	0.442714	0	0.449781	0	1.67006	4.19478	NA	predicted gene 5111	6	48539444	48540583
ENSMUSG00000052751	346.442	376.282	371.914	383.485	510.544	488.768	NA	replication initiator 1	6	48543882	48549081
ENSMUSG00000007216	201.897	172.734	181.965	132.689	121.369	108.785	NA	zinc finger protein 775	6	48563179	48573226
ENSMUSG00000064262	34.0048	34.717	29.4535	41.2085	29.8592	36.935	NA	GTPase, IMAP family member 8	6	48597233	48610874
ENSMUSG00000051124	12.7566	5.82521	10.1445	10.9656	7.33728	6.19525	NA	GTPase, IMAP family member 9	6	48626128	48629113
ENSMUSG00000054435	10.705	8.73302	2.78706	8.06599	4.88267	8.79856	NA	GTPase, IMAP family member 4	6	48634548	48642061
ENSMUSG00000047867	53.9226	48.0038	39.8789	57.0892	54.8959	67.3975	NA	GTPase, IMAP family member 6	6	48651581	48658224
ENSMUSG00000090019	20.3627	22.4731	19.1401	18.2705	18.6717	20.9312	NA	GTPase, IMAP family member 1	6	48668606	48702599
ENSMUSG00000043931	0	0	0	0.37781	0	0	NA	GTPase, IMAP family member 7	6	48668620	48674635
ENSMUSG00000043505	9.57774	4.54417	2.51403	4.28426	5.16425	7.05591	NA	GTPase, IMAP family member 5	6	48696196	48704209
ENSMUSG00000039264	0	0	0	0	0.409102	0.430329	NA	GTPase, IMAP family member 3	6	48715088	48716518
ENSMUSG00000029810	203.903	192.651	204.849	228.107	145.795	175.281	NA	transmembrane protein 176B	6	48783810	48791373
ENSMUSG00000023367	34.6483	46.9052	60.1679	68.1831	52.5688	71.98	NA	transmembrane protein 176A	6	48791482	48795363
ENSMUSG00000073090	0	0.355313	0	0	0.409102	0	NA	NA	6	48810355	48814296
ENSMUSG00000029811	0	0	0	0	1.03958	0	NA	amiloride binding protein 1 (amine oxidase, copper-containing)	6	48845253	48859187
ENSMUSG00000029813	0	0	0	0	0	0	NA	RIKEN cDNA 1600015I10 gene	6	48879894	48883686
ENSMUSG00000068537	0	0	0	0	0	0	NA	NA	6	48889788	48890126
ENSMUSG00000068536	0	0	0	0	0.630479	0	NA	diamine oxidase-like protein 2	6	48925073	48928744
ENSMUSG00000039215	0	0	0	0	0.31524	0	NA	seminal vesicle secretory protein 1	6	48936860	48941724
ENSMUSG00000029816	4.06433	8.0224	14.4576	25.335	14.1379	18.1128	NA	glycoprotein (transmembrane) nmb	6	48986517	49020928
ENSMUSG00000029815	178.593	218.087	240.181	228.313	191.63	221.683	NA	RIKEN cDNA 2410003K15 gene	6	49023794	49036750
ENSMUSG00000029814	552.235	247.429	197.643	84.9369	8.50437	6.38909	NA	insulin-like growth factor 2 mRNA binding protein 3	6	49035220	49164953
ENSMUSG00000029817	1246.64	969.488	567.914	722.965	599.183	592.933	NA	transformer 2 alpha homolog (Drosophila)	6	49193920	49214051
ENSMUSG00000050786	55.8144	87.48	75.1795	101.19	146.143	151.487	NA	coiled-coil domain containing 126	6	49269273	49291581
ENSMUSG00000047115	27.6858	22.6555	25.5175	22.5548	6.42521	5.29194	NA	RIKEN cDNA D330028D13 gene	6	49317738	49339904
ENSMUSG00000023403	0	1.42125	3.05219	1.25997	1.89144	2.17298	NA	serine threonine kinase 31	6	49345603	49419500
ENSMUSG00000029819	66.96	174.591	166.783	100.156	93.3533	85.7932	NA	neuropeptide Y	6	49772709	49779506
ENSMUSG00000038388	902.459	1002.23	982.295	1117.69	1376.98	1464.22	NA	membrane protein, palmitoylated 6 (MAGUK p55 subfamily member 6)	6	50060240	50148597
ENSMUSG00000029821	181.934	241.457	203.049	212.069	190.939	170.893	NA	deafness, autosomal dominant 5 (human)	6	50139368	50213861
ENSMUSG00000029822	103.58	154.746	161.009	189.592	346.055	384.061	NA	oxysterol binding protein-like 3	6	50243326	50406200
ENSMUSG00000063694	901.049	1076.97	1007.45	1448.29	2587.46	2287.48	NA	cytochrome c, somatic	6	50512562	50516537
ENSMUSG00000029828	21.6088	19.6728	24.2645	18.905	5.73452	5.95876	NA	RIKEN cDNA 4921507P07 gene	6	50523301	50546631
ENSMUSG00000092012	0	0	0	0	0.409102	0	NA	NA	6	50558636	50560708
ENSMUSG00000091981	0	0	0	0	0	0	NA	NA	6	50569821	50571884
ENSMUSG00000029831	0.885429	0.603073	1.43772	0.504351	0	0.666825	NA	neuropeptide VF precursor	6	50600671	50604438
ENSMUSG00000073072	0	0	0	0	0	0.215165	NA	NA	6	50796523	50828078
ENSMUSG00000029832	166.396	202.926	191.346	135.184	93.0522	77.4017	NA	nuclear factor, erythroid derived 2, like 3	6	51382669	51408767
ENSMUSG00000004980	6173.73	4223.88	3810.62	3707.17	1561.61	1698.09	NA	heterogeneous nuclear ribonucleoprotein A2/B1	6	51410433	51419893
ENSMUSG00000029836	1664.06	1135.1	1114.28	1118.73	850.373	717.317	NA	chromobox 3	6	51420359	51433703
ENSMUSG00000038301	650.302	1014.97	877.198	1431.16	2745.17	2405.45	NA	sorting nexin 10	6	51473900	51540678
ENSMUSG00000059182	67.366	90.2707	89.0753	135.988	122.878	143.706	NA	src family associated phosphoprotein 2	6	51809165	51962548
ENSMUSG00000029844	0.442714	3.09026	2.42565	6.55657	0.630479	0.645494	NA	homeobox A1	6	52105366	52108316
ENSMUSG00000014704	60.4035	39.0556	37.4453	31.1396	2.30054	1.29099	NA	homeobox A2	6	52112350	52115412
ENSMUSG00000093412	0	0	0	0.504351	0	0	NA	NA	6	52113358	52163338
ENSMUSG00000079560	17.9483	23.5813	24.7063	20.5519	1.26096	0.645494	NA	homeobox A3	6	52118509	52163335
ENSMUSG00000056468	4.18527	2.13188	1.8875	2.01741	0	0.645494	NA	NA	6	52127497	52130850
ENSMUSG00000000942	13.6421	11.2951	15.0037	21.5606	2.61578	1.74265	NA	homeobox A4	6	52139670	52141752
ENSMUSG00000059723	0	0	0	0	0	0	NA	NA	6	52149150	52163335
ENSMUSG00000038253	93.5704	138.424	171.042	146.134	8.50437	7.12176	NA	homeobox A5	6	52151753	52154586
ENSMUSG00000043219	15.0523	18.1344	32.6745	19.5432	1.85778	3.0123	NA	homeobox A6	6	52155430	52161355
ENSMUSG00000038236	0.885429	1.20615	6.10437	3.40392	0.31524	0.860659	NA	homeobox A7	6	52164490	52171853
ENSMUSG00000038227	0	0	0	0	0	0.430329	NA	homeobox A9	6	52173099	52181088
ENSMUSG00000000938	0	0	0	0	0	0	NA	homeobox A10	6	52181196	52190853
ENSMUSG00000038210	0	0	0	0	0	0	NA	homeobox A11	6	52192107	52196213
ENSMUSG00000038203	0.442714	0	0	0	0	0	NA	homeobox A13	6	52207693	52210874
ENSMUSG00000005503	11.3076	10.2945	9.87937	10.8408	1.35482	3.09763	NA	even skipped homeotic gene 1 homolog	6	52263492	52268372
ENSMUSG00000029776	240.722	246.653	256.815	357.528	564.34	594.947	NA	3-hydroxyisobutyrate dehydrogenase	6	52496222	52590383
ENSMUSG00000004535	2212.34	2020.55	2026.47	2344.11	3136.67	2837.51	NA	Tax1 (human T cell leukemia virus type I) binding protein 1	6	52663723	52716774
ENSMUSG00000063568	181.645	296.452	367.39	394.785	164.098	170.716	NA	JAZF zinc finger 1	6	52718791	53018625
ENSMUSG00000090982	10.1004	4.43662	2.33728	2.51994	4.3797	3.74312	NA	NA	6	53237289	53397716
ENSMUSG00000053007	33.9637	18.9622	27.5013	17.1425	24.8826	32.4843	NA	cAMP responsive element binding protein 5	6	53523378	53646001
ENSMUSG00000043496	270.023	465.184	704.817	1385.07	1059.2	1124.1	NA	TLR4 interactor with leucine-rich repeats	6	53765465	53770819
ENSMUSG00000078169	1.32814	2.16453	4.75503	1.88905	7.87389	7.22842	NA	NA	6	53769969	53770034
ENSMUSG00000052955	1.52898	0.355313	1.52609	2.77303	1.35482	1.09715	NA	carboxypeptidase, vitellogenic-like	6	53823373	53928656
ENSMUSG00000004633	471.709	481.309	462.12	541.464	2178.67	1633.26	NA	chimerin (chimaerin) 2	6	53989548	54251804
ENSMUSG00000045725	9.57774	13.2445	21.5579	10.8336	12.0322	13.5962	NA	proline rich 15	6	54277006	54280194
ENSMUSG00000086040	107.12	128.009	127.177	87.0645	321.905	416.791	NA	WAS/WASL interacting protein family, member 3	6	54379597	54453762
ENSMUSG00000019124	3149.92	3454.8	3621.37	4385.26	4869.04	4426.19	NA	secernin 1	6	54455884	54516483
ENSMUSG00000038074	86.4416	97.3116	79.4122	123.251	198.431	199.849	NA	FK506 binding protein 14	6	54527598	54547338
ENSMUSG00000005225	830.791	669.306	612.368	554.845	504.487	466.452	NA	pleckstrin homology domain containing, family A (phosphoinositide binding specific) member 8	6	54545105	54595833
ENSMUSG00000038065	3564.87	5155.17	5309.66	4649.97	2335.51	2379.8	NA	RIKEN cDNA 2410066E13 gene	6	54631734	54653845
ENSMUSG00000058446	1888.53	1966.68	1818.38	1179.19	654.854	524.826	NA	zinc and ring finger 2	6	54766910	54843494
ENSMUSG00000038058	43.2607	42.071	31.7907	33.0178	112.482	97.3657	NA	nucleotide-binding oligomerization domain containing 1	6	54873936	54922606
ENSMUSG00000002797	80.4422	112.225	95.9341	121.102	189.236	194.167	NA	gamma-glutamyl cyclotransferase	6	54932574	54942944
ENSMUSG00000029777	1886.24	2140.42	2265.88	2261.06	2240.15	2014.41	NA	glycyl-tRNA synthetase	6	54987995	55029498
ENSMUSG00000003476	6.92146	13.9552	13.0278	13.735	10.8049	11.2507	NA	corticotropin releasing hormone receptor 2	6	55040043	55083010
ENSMUSG00000003477	1.64992	0.603073	1.07631	0.37781	3.34012	7.22842	NA	indolethylamine N-methyltransferase	6	55120620	55125037
ENSMUSG00000038022	147.808	147.125	149.572	102.938	117.565	139.16	NA	family with sequence similarity 188, member B	6	55153377	55270216
ENSMUSG00000004655	179.882	138.307	128.536	49.2799	83.8288	49.6511	NA	aquaporin 1	6	55286426	55298549
ENSMUSG00000004654	0	0	0	0	0	0.215165	NA	growth hormone releasing hormone receptor	6	55326289	55338524
ENSMUSG00000029778	1478.53	2230.16	2837.55	3457.51	2217.92	2420.32	NA	adenylate cyclase activating polypeptide 1 receptor 1	6	55401972	55451445
ENSMUSG00000037984	2025.1	1800.02	1493.48	576.9	465.01	400.773	NA	neurogenic differentiation 6	6	55627812	55631257
ENSMUSG00000037973	23.2997	21.7951	15.2767	13.6012	22.2332	18.6729	NA	coiled-coil domain containing 129	6	55786889	55928729
ENSMUSG00000002930	12.9575	7.41932	10.771	18.0283	190.759	145.396	NA	protein phosphatase 1, regulatory subunit 17	6	55967509	55982682
ENSMUSG00000004347	512.112	720.784	695.555	1041.36	628.357	537.46	NA	phosphodiesterase 1C	6	56019815	56319628
ENSMUSG00000091625	139.237	104.226	106.609	105.098	57.9881	65.5695	NA	LSM5 homolog, U6 small nuclear RNA associated (S. cerevisiae)	6	56651057	56654686
ENSMUSG00000029787	2180.56	1840.43	1701.25	1386.81	1897.57	1838.32	NA	AVL9 homolog (S. cerevisiase)	6	56664921	56711905
ENSMUSG00000059486	1299.96	1132.1	1139.9	1071.74	1811.54	1549.8	NA	kelch repeat and BTB (POZ) domain containing 2	6	56727518	56747807
ENSMUSG00000029781	584.607	551.742	523.221	757.852	929.401	832.026	NA	FK506 binding protein 9	6	56782053	56829352
ENSMUSG00000029780	600.402	718.81	739.048	594.343	641.217	607.374	NA	5-nucleotidase, cytosolic III	6	56832394	56873926
ENSMUSG00000071893	3.94339	2.87516	2.51403	2.3934	3.02488	1.31232	NA	vomeronasal 1 receptor 4	6	56874016	56908094
ENSMUSG00000090346	0	0	0	0	0	0	NA	vomeronasal 1 receptor 5	6	56935289	56936344
ENSMUSG00000058923	0.442714	0.355313	0	0	0	0	NA	vomeronasal 1 receptor 6	6	56952294	56953351
ENSMUSG00000093696	0	0	0	0	0	0	NA	vomeronasal 1 receptor 7	6	56974100	56975318
ENSMUSG00000061208	0	0	0	0	0	0	NA	vomeronasal 1 receptor 8	6	56985907	56987119
ENSMUSG00000091541	0	0	0	0	0	0	NA	vomeronasal 1 receptor 9	6	57020889	57021939
ENSMUSG00000093785	0	0	0	0	0	0	NA	vomeronasal 1 receptor 10	6	57063390	57064361
ENSMUSG00000093635	0	0	0	0	0	0	NA	vomeronasal 1 receptor 11	6	57087293	57088319
ENSMUSG00000057981	0	0	0	0	0	0	NA	vomeronasal 1 receptor 12	6	57108914	57109848
ENSMUSG00000064259	0	0	0	0	0	0	NA	vomeronasal 1 receptor 13	6	57159852	57160754
ENSMUSG00000093692	0	0	0	0	0	0	NA	vomeronasal 1 receptor 14	6	57182837	57184365
ENSMUSG00000058731	0	0	0	0	0	0	NA	vomeronasal 1 receptor 15	6	57208143	57209042
ENSMUSG00000093523	0	0	0	0	0	0	NA	vomeronasal 1 receptor 16	6	57272639	57273651
ENSMUSG00000093411	0	0	0	0	0	0	NA	vomeronasal 1 receptor 17	6	57310446	57311425
ENSMUSG00000091382	0	0	0	0	0	0	NA	vomeronasal 1 receptor 18	6	57339574	57340660
ENSMUSG00000068426	0	0	0	0	0	0	NA	vomeronasal 1 receptor 19	6	57354360	57355477
ENSMUSG00000093679	0	0	0	0	0	0	NA	vomeronasal 1 receptor 20	6	57381638	57382689
ENSMUSG00000037826	366.077	475.655	542.401	675.654	3123.11	2481.87	NA	protein phosphatase 1K (PP2C domain containing)	6	57456496	57485420
ENSMUSG00000029798	28.0486	34.2215	28.4655	51.1617	196.015	211.048	NA	hect domain and RLD 6	6	57530986	57615130
ENSMUSG00000043162	196.742	213.683	211.699	272.335	356.902	364.249	NA	phosphatidylinositol glycan anchor biosynthesis, class Y	6	57636570	57642072
ENSMUSG00000062190	1221.97	1500.05	1618.61	1558.98	1621.33	1358.25	NA	LanC (bacterial lantibiotic synthetase component C)-like 2	6	57652595	57689432
ENSMUSG00000037788	1735.57	1961.46	2001.03	1361.91	1511.26	1319.29	NA	vesicular, overexpressed in cancer, prosurvival protein 1	6	57677801	57775148
ENSMUSG00000058588	0	0	0.449781	0	0	0	NA	vomeronasal 1 receptor 21	6	57793458	57794487
ENSMUSG00000093501	0	0	0	0	0	0	NA	vomeronasal 1 receptor 22	6	57849953	57851048
ENSMUSG00000093376	0	0	0	0	0	0	NA	vomeronasal 1 receptor 23	6	57875836	57876832
ENSMUSG00000093451	0	0	0	0	0	0	NA	vomeronasal 1 receptor 24	6	57905627	57906572
ENSMUSG00000093442	0	0	0	0	0	0	NA	NA	6	57928293	57929345
ENSMUSG00000048697	0	0	0	0	0	0	NA	vomeronasal 1 receptor 26	6	57958177	57959196
ENSMUSG00000071428	0	0	0	0	0	0	NA	vomeronasal 1 receptor 27	6	58165100	58166011
ENSMUSG00000043361	0	0	0	0	0	0	NA	NA	6	58214415	58216651
ENSMUSG00000091734	0	0	0	0	0	0	NA	vomeronasal 1 receptor 29	6	58257262	58258284
ENSMUSG00000057144	0	0	0	0	0	0	NA	NA	6	58384836	58385888
ENSMUSG00000093379	0.764492	0	0	0	0	0	NA	vomeronasal 1 receptor 31	6	58421892	58425337
ENSMUSG00000029802	313.202	289.598	250.856	312.383	416.2	345.678	NA	ATP-binding cassette, sub-family G (WHITE), member 2	6	58534517	58642863
ENSMUSG00000029804	868.616	1091.35	1153.18	1859.88	4205.2	3741.69	NA	hect domain and RLD 3	6	58781459	58870392
ENSMUSG00000055430	959.424	1888.41	2614.43	4171.38	5374.76	4493.41	NA	nucleosome assembly protein 1-like 5	6	58855228	58857120
ENSMUSG00000037709	150.903	196.442	195.892	165.32	235.494	256.922	NA	family with sequence similarity 13, member A	6	58882084	58974543
ENSMUSG00000049232	180.001	191.706	212.623	218.131	400.146	358.692	NA	tigger transposable element derived 2	6	59158864	59162027
ENSMUSG00000045441	176.379	410.784	470.892	572.942	387.739	432.489	NA	GPRIN family member 3	6	59302455	59376284
ENSMUSG00000046764	0	0	0	0	0	0	NA	NA	6	60346343	60353692
ENSMUSG00000025889	555.416	1145.25	1108.98	1662.06	2865.82	2354.64	NA	synuclein, alpha	6	60681567	60779849
ENSMUSG00000054641	73.24	29.0416	20.2085	36.5501	2.67599	3.0763	NA	multimerin 1	6	60874970	60939372
ENSMUSG00000039578	1060.13	893.86	895.824	569.279	487.974	538.529	NA	family with sequence similarity 190, member A	6	61130318	62332859
ENSMUSG00000071424	260.927	491.454	617.421	793.822	1017.81	838.034	NA	glutamate receptor, ionotropic, delta 2	6	63205870	64618276
ENSMUSG00000073043	18.8337	12.8892	4.66665	57.4852	0	0	NA	atonal homolog 1 (Drosophila)	6	64679140	64681227
ENSMUSG00000029920	2195	1695.78	1568.23	1028.84	831.05	709.937	NA	SWI/SNF-related, matrix-associated actin-dependent regulator of chromatin, subfamily a, containing DEAD/H box 1	6	64992661	65066044
ENSMUSG00000029919	52.1129	44.8059	45.9833	74.6095	107.645	99.3856	NA	hematopoietic prostaglandin D synthase	6	65067287	65094902
ENSMUSG00000029917	5.39247	14.806	12.7548	23.3158	14.1114	14.5848	NA	RIKEN cDNA C130060K24 gene	6	65331099	65408144
ENSMUSG00000044162	0.764492	0.958386	0.538156	1.13343	1.44868	1.74265	NA	TNFAIP3 interacting protein 3	6	65540392	65584034
ENSMUSG00000049001	196.824	401.056	399.632	349.218	295.9	255.957	NA	RIKEN cDNA A930038C07 gene	6	65621584	65656924
ENSMUSG00000029913	139.477	115.339	83.5328	88.9663	120.154	159.733	NA	PR domain containing 5	6	65728982	65886367
ENSMUSG00000036463	0	0	0	0	0	0	NA	RIKEN cDNA 4930544G11 gene	6	65902565	65904006
ENSMUSG00000029910	239.679	128.742	117.227	182.492	84.755	77.4639	NA	MAD2 mitotic arrest deficient-like 1	6	66485384	66491027
ENSMUSG00000062905	0	0	0	0	0.945719	0.430329	NA	vomeronasal 1 receptor 32	6	66502177	66509702
ENSMUSG00000059375	0	0	0	0	0	0.215165	NA	vomeronasal 1 receptor 33	6	66561442	66566056
ENSMUSG00000091012	0	0.603073	0	0	0	0	NA	vomeronasal 1 receptor 34	6	66586817	66587746
ENSMUSG00000060699	0	0	0	0	0	0	NA	vomeronasal 1 receptor 35	6	66628788	66629678
ENSMUSG00000093764	0	0	0	0	0	0	NA	vomeronasal 1 receptor 36	6	66665896	66666924
ENSMUSG00000057612	0	0.355313	0	0	0	0	NA	vomeronasal 1 receptor 37	6	66681386	66682294
ENSMUSG00000093632	0	0	0	0	0	0.45166	NA	vomeronasal 1 receptor 38	6	66726138	66727173
ENSMUSG00000093755	0	0	0	0	0	0	NA	vomeronasal 1 receptor 39	6	66754206	66755437
ENSMUSG00000053442	0.442714	4.0813	7.36534	6.29804	3.71557	7.50757	NA	RIKEN cDNA 4930597O21 gene	6	66844648	66846515
ENSMUSG00000036402	246.479	431.221	528.441	921.783	841.669	785.059	NA	guanine nucleotide binding protein (G protein), gamma 12	6	66846391	66971344
ENSMUSG00000036390	59.5181	47.7464	44.2725	61.3807	101.22	103.278	NA	growth arrest and DNA-damage-inducible 45 alpha	6	66985090	66987451
ENSMUSG00000036371	5404.44	5116.72	4940.88	5216.99	4259.38	3659.46	NA	serpine1 mRNA binding protein 1	6	67216973	67239296
ENSMUSG00000018341	11.7503	9.5512	10.5138	10.0816	10.7713	10.8844	NA	interleukin 12 receptor, beta 2	6	67241312	67326182
ENSMUSG00000049093	0	1.56146	2.78706	0.37781	1.44868	1.29099	NA	interleukin 23 receptor	6	67372926	67441849
ENSMUSG00000051397	2.41441	9.69141	15.2609	10.5841	3.62171	3.76445	NA	tumor-associated calcium signal transducer 2	6	67484053	67485816
ENSMUSG00000091800	0.764492	0	0	0	0	0	NA	NA	6	68111409	68111750
ENSMUSG00000079544	0	0	0	0	0	0	NA	NA	6	68845618	68853243
ENSMUSG00000073028	0	0	0	0	0	0	NA	NA	6	69193152	69193439
ENSMUSG00000076548	0	0	0	0	0	0	NA	NA	6	69233788	69234313
ENSMUSG00000079542	0	0	0	0	0	0	NA	NA	6	69550060	69567418
ENSMUSG00000072477	0	0	0	0	0	0	NA	NA	6	70374156	70374424
ENSMUSG00000053604	332.718	334.912	265.168	230.575	241.756	227.1	NA	ribose 5-phosphate isomerase A	6	70715714	70742226
ENSMUSG00000031668	478.436	457.97	442.852	417.978	564.682	483.262	NA	eukaryotic translation initiation factor 2 alpha kinase 3	6	70794509	70855239
ENSMUSG00000051896	0	0	0	0	0	0	NA	RIKEN cDNA 1700011F03 gene	6	70863081	70868921
ENSMUSG00000055874	0	0.603073	0	0	0	0	NA	forkhead box I3	6	70906525	70911060
ENSMUSG00000054474	21.49	28.7189	39.8631	35.9173	71.1803	64.1079	NA	threonine synthase-like 2 (bacterial)	6	71078160	71094340
ENSMUSG00000054422	6.84155	14.0531	8.61049	0.75562	2.20668	2.81847	NA	fatty acid binding protein 1, liver	6	71149821	71155017
ENSMUSG00000055027	8.57138	14.4507	24.4254	60.3593	50.7712	51.1999	NA	SET and MYND domain containing 1	6	71163934	71272227
ENSMUSG00000053012	193.278	173.193	165.282	194.976	257.882	272.604	NA	lysine-rich coiled-coil 1	6	71221713	71235312
ENSMUSG00000073018	0	0.355313	0.987937	0.75562	0.724341	1.31232	NA	NA	6	71243759	71252712
ENSMUSG00000053044	2.09263	2.16453	0.449781	2.3934	1.54254	2.00047	NA	CD8 antigen, beta chain 1	6	71272830	71287471
ENSMUSG00000053977	2.09263	2.73495	0.449781	0.882161	1.03958	0.215165	NA	CD8 antigen, alpha chain	6	71323421	71329165
ENSMUSG00000002222	1350.28	1479.2	1565.18	1804.43	3918	3380.71	NA	required for meiotic nuclear division 5 homolog A (S. cerevisiae)	6	71338628	71390631
ENSMUSG00000052656	561.491	579.55	658.993	620.069	941.809	823.929	NA	ring finger protein 103	6	71443888	71475014
ENSMUSG00000053119	689.418	765.225	721.867	867.314	1357.83	1374.73	NA	charged multivesicular body protein 3	6	71493791	71532603
ENSMUSG00000053470	1065.06	745.453	624.14	475.228	517.095	608.567	NA	lysine (K)-specific demethylase 3A	6	71538968	71582899
ENSMUSG00000052852	4292.73	5403.69	5567.24	4845.75	2894.87	2336.04	NA	receptor accessory protein 1	6	71657555	71760704
ENSMUSG00000052962	189.095	206.619	182.35	238.035	249.243	275.227	NA	mitochondrial ribosomal protein L35	6	71762997	71773804
ENSMUSG00000052337	1414.51	1467.26	1597.83	1682.66	1855.95	1786.86	NA	inner membrane protein, mitochondrial	6	71781325	71827382
ENSMUSG00000063884	875.928	842.897	755.368	733.649	974.76	970.185	NA	pentatricopeptide repeat domain 3	6	71830642	71858756
ENSMUSG00000049553	584.871	649.779	671.418	641.624	525.057	531.318	NA	polymerase (RNA) I polypeptide A	6	71859047	71929350
ENSMUSG00000056091	366.718	349.916	396.957	476.485	842.942	898.641	NA	ST3 beta-galactoside alpha-2,3-sialyltransferase 5	6	72047607	72104564
ENSMUSG00000037621	6.72062	7.74198	9.16446	11.5965	12.1261	12.09	NA	atonal homolog 8 (Drosophila)	6	72156171	72185571
ENSMUSG00000056370	0.442714	0	0.538156	0.37781	0	0	NA	surfactant associated protein B	6	72254619	72262926
ENSMUSG00000056305	453.687	434.239	407.358	440.52	486.437	437.189	NA	ubiquitin specific peptidase 39	6	72268672	72295178
ENSMUSG00000058706	216.094	159.247	158.206	138.62	142.173	156.434	NA	RIKEN cDNA 0610030E20 gene	6	72297311	72303152
ENSMUSG00000055912	49.8172	69.3552	64.2633	55.9485	14.9367	19.7914	NA	transmembrane protein 150A	6	72305441	72309756
ENSMUSG00000055850	267.08	288.873	267.594	310.123	304.937	344.234	NA	ring finger protein 181	6	72309708	72312715
ENSMUSG00000073002	23.7835	17.2183	7.9035	11.8459	20.5702	21.7279	NA	vesicle-associated membrane protein 5	6	72318043	72330462
ENSMUSG00000050732	31.8322	40.5749	33.9434	46.7545	101.636	99.5405	NA	vesicle-associated membrane protein 8	6	72335217	72340697
ENSMUSG00000091253	0	0.355313	0	0	0	0	NA	NA	6	72342052	72343053
ENSMUSG00000079161	0.442714	0	0	0	0	0	NA	NA	6	72349004	72349581
ENSMUSG00000053460	209.944	228.48	196.88	205.641	222.228	268.575	NA	gamma-glutamyl carboxylase	6	72364302	72380706
ENSMUSG00000053907	1996.56	1904.1	1903.15	1510.25	1347.51	1464.17	NA	methionine adenosyltransferase II, alpha	6	72382793	72389552
ENSMUSG00000052631	3.29984	2.6274	2.87544	2.26867	2.70964	2.88246	NA	SH2 domain containing 6	6	72463638	72471628
ENSMUSG00000056737	20.5635	18.7797	17.5098	23.4387	34.8959	27.3435	NA	capping protein (actin filament), gelsolin-like	6	72494385	72512977
ENSMUSG00000056698	82.7357	96.7086	109.596	101.436	141.362	155.061	NA	ELMO/CED-12 domain containing 3	6	72515916	72548407
ENSMUSG00000056666	33.8039	57.9103	50.1197	80.4032	142.515	139.657	NA	retinol saturase (all trans retinol 13,14 reductase)	6	72548469	72558419
ENSMUSG00000056429	809.903	889.802	985.271	1182.65	3457.23	3059.96	NA	trans-golgi network protein	6	72558426	72566994
ENSMUSG00000055799	34.4453	16.9052	21.1318	24.8343	3.30647	8.00189	NA	transcription factor 7 like 1 (T cell specific, HMG box)	6	72576372	72739248
ENSMUSG00000072999	3.62162	0	1.97587	3.77991	2.26689	1.52748	NA	NA	6	72579282	72587711
ENSMUSG00000055239	618.668	608.386	718.358	712.701	789.396	796.938	NA	potassium channel modulatory factor 1	6	72791108	72849973
ENSMUSG00000079523	3605.91	3261.08	3124.41	2485.46	350.022	370.224	NA	thymosin, beta 10	6	72907341	72908742
ENSMUSG00000052861	83.4613	85.5959	124.761	111.658	83.3737	92.6923	NA	dynein, axonemal, heavy chain 6	6	72967600	73171645
ENSMUSG00000052738	345.516	397.801	401.882	524.45	797.088	873.246	NA	succinate-CoA ligase, GDP-forming, alpha subunit	6	73198376	73226905
ENSMUSG00000056197	0	0	0	0	0	0	NA	RIKEN cDNA 4931417E11 gene	6	73418598	73419661
ENSMUSG00000072476	0	0	0	0.882161	0.31524	0	NA	NA	6	76445472	76447778
ENSMUSG00000063063	4168.84	4213.77	3915.27	3472.12	3258.23	3012.89	NA	catenin (cadherin associated protein), alpha 2	6	76831631	77929693
ENSMUSG00000060780	255.211	424.325	540.223	530.576	530.965	498.227	NA	leucine rich repeat transmembrane neuronal 1	6	77192683	77207785
ENSMUSG00000063692	1.20721	1.3137	2.78706	1.51124	0.724341	0.90332	NA	NA	6	78165849	78167290
ENSMUSG00000071356	1.52898	5.50255	3.775	0.882161	0.31524	0.430329	NA	regenerating islet-derived 3 beta	6	78320879	78323460
ENSMUSG00000068341	0	0	0	0	0	0	NA	regenerating islet-derived 3 delta	6	78325868	78328859
ENSMUSG00000079516	0	0.355313	0	0	0	0	NA	regenerating islet-derived 3 alpha	6	78330703	78333833
ENSMUSG00000023140	0	0	0	0	0	0	NA	regenerating islet-derived 2	6	78355149	78358091
ENSMUSG00000059654	0	0	0	0	0	0	NA	regenerating islet-derived 1	6	78375974	78378661
ENSMUSG00000030017	0	0.603073	0.449781	1.0087	0	0	NA	regenerating islet-derived 3 gamma	6	78416263	78418866
ENSMUSG00000090361	1.9717	4.89948	8.17653	4.78862	4.34605	3.11896	NA	NA	6	79961316	79962446
ENSMUSG00000052581	358.594	503.068	505.461	576.225	594.277	596.724	NA	leucine rich repeat transmembrane neuronal 4	6	79968871	80760137
ENSMUSG00000035125	255.774	246.007	266.718	196.689	139.283	125.607	NA	expressed sequence AW146020	6	81873663	81909909
ENSMUSG00000030045	295.737	274.404	280.333	292.333	349.558	362.368	NA	mitochondrial ribosomal protein L19	6	81907845	81915952
ENSMUSG00000035104	6.72062	5.99807	10.0561	13.8579	188.168	150.221	NA	family with sequence similarity 176, member A	6	81991037	82043093
ENSMUSG00000030043	50.8646	70.1964	70.344	99.6897	49.3031	52.3165	NA	tachykinin receptor 1	6	82352328	82510097
ENSMUSG00000030042	358.272	489.933	472.411	489.37	360.161	360.584	NA	polymerase (DNA-directed), epsilon 4 (p12 subunit)	6	82568986	82655359
ENSMUSG00000000628	154.451	102.707	79.6852	130.941	133.897	122.961	NA	hexokinase 2	6	82675019	82724448
ENSMUSG00000000627	203.221	304.709	361.937	297.755	303.012	307.275	NA	sema domain, immunoglobulin domain (Ig), TM domain, and short cytoplasmic domain	6	82861879	82889763
ENSMUSG00000030041	1.20721	0	0	0.37781	0	0.430329	NA	DNA segment, Chr 6, Miriam Meisler 5, expressed	6	82896896	82980177
ENSMUSG00000068335	17.8273	12.9545	12.1204	18.7767	25.2581	22.6952	NA	docking protein 1	6	82980928	82983465
ENSMUSG00000000693	88.1714	84.4033	56.4812	80.5134	84.5602	85.9851	NA	lysyl oxidase-like 3	6	82984167	83002556
ENSMUSG00000068329	179.437	189.173	229.04	216.724	214.734	199.159	NA	HtrA serine peptidase 2	6	83001260	83005267
ENSMUSG00000068328	232.187	246.186	253.922	241.468	195.882	219.036	NA	ancient ubiquitous protein 1	6	83004647	83007674
ENSMUSG00000009145	15.7347	17.0781	11.4055	10.7107	11.7506	7.9379	NA	DEAQ RNA-dependent ATPase	6	83007838	83017204
ENSMUSG00000068327	1.32814	2.13188	0.449781	0	0	0	NA	T cell leukemia, homeobox 2	6	83018311	83020287
ENSMUSG00000069678	88.6508	79.6401	91.0749	61.6102	86.519	81.0577	NA	polycomb group ring finger 1	6	83027863	83030849
ENSMUSG00000034968	0	1.56146	1.97587	0.882161	1.13344	0.881989	NA	ladybird homeobox homolog 2 (Drosophila)	6	83036359	83038237
ENSMUSG00000079511	107.044	165.872	172.816	120.578	79.5979	92.0932	NA	coiled-coil domain containing 142	6	83051611	83059933
ENSMUSG00000030037	3.74255	4.79193	2.06425	2.14213	4.60108	1.31232	NA	mitochondrial ribosomal protein L53	6	83059089	83059933
ENSMUSG00000030036	377.145	419.844	396.011	382.285	362.991	355.356	NA	mannosyl-oligosaccharide glucosidase	6	83065490	83068892
ENSMUSG00000030035	739.203	481.34	413.592	360.63	282.341	269.681	NA	WW domain binding protein 1	6	83069038	83071553
ENSMUSG00000030034	141.247	139.415	164.463	118.208	87.8136	100.847	NA	INO80 complex subunit B	6	83071759	83075425
ENSMUSG00000034930	78.5116	65.3296	69.5975	126.42	423.046	432.648	NA	rhotekin	6	83085457	83102573
ENSMUSG00000030032	74.1665	96.6855	100.601	83.2883	124.728	133.89	NA	WD repeat domain 54	6	83099355	83106391
ENSMUSG00000030030	18.3089	51.8469	66.015	82.6664	88.4848	115.002	NA	RIKEN cDNA 1700003E16 gene	6	83106398	83112969
ENSMUSG00000031865	2051.71	2298.27	2794.74	2831.05	2629.78	2831.74	NA	dynactin 1	6	83115914	83150111
ENSMUSG00000068323	57.0216	35.6101	47.4447	22.6867	20.6641	25.19	NA	solute carrier family 4, sodium bicarbonate cotransporter, member 5	6	83169822	83254939
ENSMUSG00000005667	182.616	185.427	218.615	202.756	95.0712	104.205	NA	methylenetetrahydrofolate dehydrogenase (NAD+ dependent), methenyltetrahydrofolate cyclohydrolase	6	83255685	83267600
ENSMUSG00000043131	863.191	700.222	595.396	753.796	847.644	772.742	NA	MOB kinase activator 1A	6	83276010	83293770
ENSMUSG00000045160	58.9954	76.4749	76.7135	109.891	146.218	182.831	NA	bolA-like 3 (E. coli)	6	83299141	83310130
ENSMUSG00000034832	1454.73	1116.91	1317.69	1025.23	640.771	695.491	NA	tet methylcytosine dioxygenase 3	6	83312367	83391672
ENSMUSG00000014554	131.225	137.648	113.572	117.315	114.876	127.311	NA	deoxyguanosine kinase	6	83430211	83456963
ENSMUSG00000059430	4.70789	3.80089	1.52609	4.79043	2.17302	1.97914	NA	actin, gamma 2, smooth muscle, enteric	6	83462899	83486259
ENSMUSG00000006906	133.436	140.001	173.554	155.396	85.2651	115.089	NA	STAM binding protein	6	83493200	83522498
ENSMUSG00000014542	0.442714	3.23047	2.51403	1.88905	0.31524	0.860659	NA	C-type lectin domain family 4, member f	6	83594536	83606181
ENSMUSG00000034783	0	0	0.538156	0	0	0	NA	CD207 antigen	6	83621201	83627851
ENSMUSG00000034777	0.442714	0.603073	0	0.37781	0	0	NA	ventral anterior homeobox containing gene 2	6	83661258	83688298
ENSMUSG00000006269	1.9717	3.72599	1.43772	0.504351	0	0.215165	NA	ATPase, H+ transporting, lysosomal V1 subunit B1	6	83693011	83708803
ENSMUSG00000014747	1.64992	0.603073	0.538156	1.25997	1.13344	2.88246	NA	ankyrin repeat domain 53	6	83712638	83718320
ENSMUSG00000014748	234.001	227.85	233.321	249.787	219.947	224.484	NA	testis expressed gene 261	6	83718875	83725806
ENSMUSG00000034744	300.81	371.752	336.902	321.296	268.867	259.346	NA	N-acetylglucosamine kinase	6	83744976	83753414
ENSMUSG00000045896	1187.58	1208.52	1217.09	985.466	1149.18	1128.41	NA	poly(A) binding protein interacting protein 2B	6	83755395	83781735
ENSMUSG00000079501	0	0	0	0	0.31524	0	NA	NA	6	83824193	83825421
ENSMUSG00000030016	3884.23	3677.64	3290.63	2843.44	3319.57	3015.42	NA	zinc finger, matrin-like	6	83864347	83936863
ENSMUSG00000033788	65.2345	59.2893	63.1396	114.29	67.5657	60.1246	NA	dysferlin	6	83958584	84161054
ENSMUSG00000063415	387.245	350.229	349.343	383.775	122.334	126.964	NA	cytochrome P450, family 26, subfamily b, polypeptide 1	6	84521938	84543740
ENSMUSG00000033769	1444.06	1545.84	1634.37	1456.05	1627.9	1754.52	NA	exocyst complex component 6B	6	84568480	85019507
ENSMUSG00000072952	1.20721	1.06594	1.43772	1.63778	0.31524	0.881989	NA	predicted gene 5878	6	85061410	85076119
ENSMUSG00000033735	160.003	193.865	153.372	240.759	316.373	337.102	NA	sepiapterin reductase	6	85083672	85087760
ENSMUSG00000068303	4.94976	4.0813	2.51403	0.37781	0.409102	0	NA	NA	6	85104999	85106228
ENSMUSG00000033726	201.612	109.364	78.0707	81.2291	100.63	104.955	NA	empty spiracles homeobox 1	6	85137432	85154456
ENSMUSG00000033720	453.855	944.728	1108.11	2331.69	4791.6	4949.06	NA	sideroflexin 5	6	85163045	85283416
ENSMUSG00000051343	520.85	737.974	936.236	1070.81	1432.61	1399.77	NA	RAB11 family interacting protein 5 (class I)	6	85284957	85324628
ENSMUSG00000068302	0	0	0	0	0	0	NA	notochord homolog (Xenopus laevis)	6	85373880	85379596
ENSMUSG00000033706	317.668	440.223	472.073	423.074	237.124	297.856	NA	SET and MYND domain containing 5	6	85381983	85396429
ENSMUSG00000030008	38.7537	54.2823	33.2284	49.269	65.2049	80.1312	NA	RIKEN cDNA 1700040I03 gene	6	85396804	85401964
ENSMUSG00000030007	3471.86	3180.09	3141.6	2859.29	3057.82	2942.12	NA	chaperonin containing Tcp1, subunit 7 (eta)	6	85401499	85418471
ENSMUSG00000047013	582.258	1063.37	1256.19	1441.64	1262.03	1373.37	NA	F-box protein 41	6	85419568	85452988
ENSMUSG00000071341	0	1.77656	3.59825	10.2045	22.173	36.3554	NA	early growth response 4	6	85461125	85463583
ENSMUSG00000063810	714.884	601.514	577.178	499.437	548.624	507.544	NA	Alstrom syndrome 1	6	85537525	85652747
ENSMUSG00000089694	0	0.355313	0	0	2.48826	1.97914	NA	predicted gene 4477	6	85656721	85663199
ENSMUSG00000051262	0.442714	1.06594	1.07631	0.882161	16.0294	16.6511	NA	camello-like 3	6	85710643	85715738
ENSMUSG00000079495	0.764492	1.06594	0.449781	1.13343	2.99123	2.17298	NA	predicted gene 11128	6	85758018	85770948
ENSMUSG00000079494	0	0.603073	0.987937	2.14213	21.7037	18.0061	NA	camello-like 5	6	85767215	85770966
ENSMUSG00000030004	0	0	0.987937	1.38651	8.21569	5.01278	NA	N-acetyltransferase 8 (GCN5-related, putative)	6	85780382	85782076
ENSMUSG00000033634	1.77086	4.22151	2.15262	0	2.89737	1.29099	NA	camello-like 2	6	85815416	85819152
ENSMUSG00000068299	65.634	70.4019	74.0953	81.1516	200.464	174.919	NA	RIKEN cDNA 1700019G17 gene	6	85849045	85854878
ENSMUSG00000057103	46.8824	41.8886	38.3449	46.1182	110.872	115.5	NA	camello-like 1	6	85860148	85865681
ENSMUSG00000054226	291.63	349.995	352.468	366.042	853.019	858.34	NA	Tp53rk binding protein	6	85865732	85880278
ENSMUSG00000089634	0	0	0	0	0.409102	0.430329	NA	NA	6	85882675	85883373
ENSMUSG00000030002	1011.71	959.847	1020.24	919.391	500.375	499.506	NA	dual specificity phosphatase 11 (RNA/RNP complex 1-interacting)	6	85892262	85911661
ENSMUSG00000030001	0.764492	0.603073	0.538156	0	0.31524	0	NA	folliculogenesis specific basic helix-loop-helix	6	85967185	85970990
ENSMUSG00000030000	1814.19	2138.61	2044.58	1428.72	1792.17	1693.39	NA	adducin 2 (beta)	6	86028078	86069549
ENSMUSG00000029999	245.834	486.765	517.485	609.528	418.269	435.959	NA	transforming growth factor alpha	6	86145420	86225151
ENSMUSG00000057497	625.439	576.931	414.138	454.734	413.555	387.953	NA	family with sequence similarity 136, member A	6	86315677	86320051
ENSMUSG00000057278	311.064	267.034	248.149	194.048	120.905	123.804	NA	small nuclear ribonucleoprotein polypeptide G	6	86321534	86328896
ENSMUSG00000029998	1325.88	1314.36	1594.91	1671.74	2267.13	2104.91	NA	prenylcysteine oxidase 1	6	86336000	86347144
ENSMUSG00000071337	3070.95	2846.78	2547.92	1796.28	1145.19	1141.95	NA	cytotoxic granule-associated RNA binding protein 1	6	86354213	86383397
ENSMUSG00000046679	221.849	215.114	205.884	189.524	314.272	296.676	NA	expressed sequence C87436	6	86388368	86423494
ENSMUSG00000051695	572.665	492.377	548.276	558.311	375.643	411.761	NA	poly(rC) binding protein 1	6	86474493	86476165
ENSMUSG00000033508	2.21357	3.72599	10.2408	9.32415	9.95306	8.81989	NA	aspartic peptidase, retroviral-like 1	6	86578168	86579696
ENSMUSG00000001156	331.755	256.044	280.019	245.237	261.718	279.496	NA	MAX dimerization protein 1	6	86597038	86619153
ENSMUSG00000001158	272.185	265.162	221.328	233.155	242.428	229.298	NA	small nuclear ribonucleoprotein 27 (U4/U6.U5)	6	86625215	86634516
ENSMUSG00000001157	523.143	444.595	431.744	440.748	457.841	472.919	NA	germ cell-less homolog 1 (Drosophila)	6	86641762	86683372
ENSMUSG00000029994	52.5556	47.2182	31.7024	47.5138	57.0689	76.8416	NA	annexin A4	6	86686834	86743578
ENSMUSG00000057230	783.58	1045.52	1224.21	1328.25	3046.93	3590.43	NA	AP2 associated kinase 1	6	86799511	86941858
ENSMUSG00000029993	246.842	301.626	281.055	323.845	311.872	309.537	NA	NFU1 iron-sulfur cluster scaffold homolog (S. cerevisiae)	6	86959230	86978455
ENSMUSG00000029992	1923	2001.31	2126.43	2131.98	1320.27	1212.09	NA	glutamine fructose-6-phosphate transaminase 1	6	86992840	87042191
ENSMUSG00000090891	0	0	1.43772	0	0	0.215165	NA	DNA segment, Chr 6, ERATO Doi 527, expressed	6	87054820	87062245
ENSMUSG00000033420	183.623	187.406	192.133	234.557	138.27	167.43	NA	anthrax toxin receptor 1	6	87083848	87285769
ENSMUSG00000030050	0	0	0	0.882161	0.818203	3.2488	NA	gastrokine 1	6	87295647	87300917
ENSMUSG00000030049	0	0	0	0	0	0	NA	gastrokine 2	6	87323359	87329488
ENSMUSG00000030048	0.885429	1.91677	0.538156	3.27556	12.9177	18.7583	NA	gastrokine 3	6	87333262	87338929
ENSMUSG00000030046	0.442714	0	0.538156	0.37781	0	0	NA	bone morphogenetic protein 10	6	87378996	87384506
ENSMUSG00000030047	14.4066	19.21	18.5057	31.7542	75.7743	91.444	NA	Rho GTPase activating protein 25	6	87408539	87483253
ENSMUSG00000049409	72.5965	41.9634	44.4651	28.1044	5.79473	4.60378	NA	prokineticin receptor 1	6	87528587	87540695
ENSMUSG00000030051	131.912	128.99	115.877	104.33	83.5614	86.9293	NA	aprataxin and PNKP like factor	6	87578423	87622162
ENSMUSG00000068263	45.1115	66.9986	74.9869	57.4561	55.5529	60.2331	NA	coiled-coil domain containing 48	6	87680863	87705906
ENSMUSG00000068262	9.45681	12.1037	10.2408	10.0816	8.28299	9.09905	NA	NA	6	87714930	87716225
ENSMUSG00000030054	2.53535	1.3137	0	0	2.26689	2.4308	NA	glycoprotein 9 (platelet)	6	87728130	87729756
ENSMUSG00000030055	169.903	225.367	229.386	231.482	231.556	241.021	NA	RAB43, member RAS oncogene family	6	87738847	87762158
ENSMUSG00000030056	314.286	254.483	251.345	281.404	265.715	242.679	NA	ISY1 splicing factor homolog (S. cerevisiae)	6	87768441	87788753
ENSMUSG00000030057	2389.17	2292.27	2533.13	2666.14	3726.69	3590.86	NA	cellular nucleic acid binding protein	6	87792609	87801100
ENSMUSG00000030058	2046.22	2358.81	2606.28	2656.99	3964.39	3878.95	NA	coatomer protein complex, subunit gamma	6	87837808	87863589
ENSMUSG00000030060	159.841	167.844	144.247	150.065	162.796	150.801	NA	RIKEN cDNA 8430410A17 gene	6	87863929	87886623
ENSMUSG00000044927	184.102	129.739	142.527	120.874	34.648	46.5303	NA	H1 histone family, member X	6	87930416	87931476
ENSMUSG00000084950	87.8474	96.3341	95.8299	65.1389	88.4175	89.9416	NA	NA	6	87930877	87955465
ENSMUSG00000079477	779.142	926.716	1009.71	1102.47	1195.8	1429.76	NA	RAB7, member RAS oncogene family	6	87949100	87995264
ENSMUSG00000030062	1642.68	1884.03	1758.12	2027.15	1952.38	1914.77	NA	ribophorin I	6	88034467	88055298
ENSMUSG00000015053	29.6187	24.3245	32.3368	29.7477	11.3079	15.3156	NA	GATA binding protein 2	6	88143885	88157024
ENSMUSG00000048206	0	0	0	0	0	0	NA	DnaJ (Hsp40) homolog, subfamily B, member 8	6	88172262	88173250
ENSMUSG00000033216	175.693	184.091	175.7	176.555	160.582	198.384	NA	eukaryotic elongation factor, selenocysteine-tRNA-specific	6	88207328	88396533
ENSMUSG00000030079	564.15	525.819	450.682	474.425	514.614	460.255	NA	RuvB-like protein 1	6	88415403	88447566
ENSMUSG00000030082	1951.92	1920.59	1824.34	2039.42	1476.81	1339.17	NA	Sec61 alpha 1 subunit (S. cerevisiae)	6	88453595	88468899
ENSMUSG00000033182	3.86349	6.35339	2.33728	1.76432	3.11874	6.19525	NA	kelch repeat and BTB (POZ) domain containing 12	6	88497716	88577439
ENSMUSG00000033174	182.053	441.013	546.851	1036.91	2164.75	2386.8	NA	monoglyceride lipase	6	88674406	88778354
ENSMUSG00000030083	137.023	164.408	180.688	151.708	297.619	279.594	NA	ankyrin repeat and BTB (POZ) domain containing 1	6	88785909	88791929
ENSMUSG00000033152	2940.38	3498.91	4067.77	3479.49	1883.05	1712.11	NA	podocalyxin-like 2	6	88792552	88825038
ENSMUSG00000002870	625.477	258.069	184.157	385.32	77.1769	74.4748	NA	minichromosome maintenance deficient 2 mitotin (S. cerevisiae)	6	88833469	88848774
ENSMUSG00000002871	114.808	152.412	136.086	120.59	178.277	195.848	NA	transmembrane protein, adipocyte asscociated 1	6	88852245	88862232
ENSMUSG00000055403	0	0	1.97587	1.13343	0	0.666825	NA	RIKEN cDNA 4933427D06 gene	6	89046104	89060031
ENSMUSG00000090254	0	0	0	0	0	0	NA	predicted gene 1965	6	89090999	89097379
ENSMUSG00000072917	0	0	0	0	0	0	NA	NA	6	89090999	89097347
ENSMUSG00000060416	0	0	0.449781	0	0	0	NA	NA	6	89161159	89166231
ENSMUSG00000030084	2409.01	2556.68	2871.72	2609.58	959.209	1042.99	NA	plexin A1	6	89266310	89312607
ENSMUSG00000030086	306.164	456.954	430.171	440.355	351.456	434.863	NA	coiled-coil-helix-coiled-coil-helix domain containing 6	6	89333140	89545646
ENSMUSG00000000811	149.015	187.849	261.249	205.757	81.6363	72.2823	NA	thioredoxin reductase 3	6	89593982	89625523
ENSMUSG00000059546	0	0	0	0	0	0	NA	NA	6	89664197	89665129
ENSMUSG00000068230	0	0	0	0	0	0	NA	NA	6	89696473	89697408
ENSMUSG00000068232	0	0	0	0	0	0	NA	vomeronasal 1 receptor 42	6	89794512	89795609
ENSMUSG00000068231	0	0	0	0	0	0	NA	vomeronasal 1 receptor 43	6	89819455	89820523
ENSMUSG00000068234	0	0	0	0	0	0	NA	vomeronasal 1 receptor 44	6	89843171	89844278
ENSMUSG00000044248	0	0.355313	0	0	0	0	NA	vomeronasal 1 receptor 45	6	89881643	89890501
ENSMUSG00000061653	0	0	0	0.504351	0	0	NA	vomeronasal 1 receptor 46	6	89926165	89927094
ENSMUSG00000060724	0	0	0	0	0	0	NA	vomeronasal 1 receptor 47	6	89971882	89972814
ENSMUSG00000057592	0	0	0	0	0	0	NA	vomeronasal 1 receptor 48	6	89985927	89986835
ENSMUSG00000060151	0	0	0	0	0	0	NA	NA	6	90022080	90023012
ENSMUSG00000058595	0	0	0	0	0	0	NA	NA	6	90057269	90058201
ENSMUSG00000062818	0	0	0	0	0	0	NA	vomeronasal 1 receptor 51	6	90072637	90080984
ENSMUSG00000060816	0	0	0	0	0	0	NA	vomeronasal 1 receptor 52	6	90128710	90129639
ENSMUSG00000062546	0	0	0	0	0	0	NA	vomeronasal 1 receptor, A8	6	90152787	90153676
ENSMUSG00000057697	0	0	0	0.504351	0	0	NA	vomeronasal 1 receptor 53	6	90173311	90174432
ENSMUSG00000047203	0	0	0	0	0	0	NA	vomeronasal 1 receptor 54	6	90219100	90220047
ENSMUSG00000049694	0	0	0	0	0	0	NA	cDNA sequence BC048671	6	90251213	90255443
ENSMUSG00000056643	0	0.603073	0	1.38651	0.630479	0.666825	NA	carbohydrate (chondroitin 4) sulfotransferase 13	6	90258345	90275179
ENSMUSG00000034456	1.32814	2.16453	2.69078	0.37781	0.945719	3.03364	NA	urocanase domain containing 1	6	90283283	90314545
ENSMUSG00000034430	456.421	483.164	535.951	432.581	445.654	454.424	NA	ZXD family zinc finger C	6	90319486	90353484
ENSMUSG00000048794	70.1	84.24	69.4365	68.5501	33.9573	41.8838	NA	coiled-coil domain containing 37	6	90353730	90378791
ENSMUSG00000030087	85.7958	150.098	152.407	155.754	219.831	205.306	NA	Kruppel-like factor 15	6	90412570	90425232
ENSMUSG00000030088	659.245	1155.67	1448.71	2083.27	1451.86	1338.95	NA	aldehyde dehydrogenase 1 family, member L1	6	90436421	90550197
ENSMUSG00000030089	33.1992	52.7861	70.2161	115.925	148.901	109.504	NA	solute carrier family 41, member 3	6	90554719	90596406
ENSMUSG00000034312	897.503	1209.62	1520.75	1845.18	2738.74	3012.03	NA	IQ motif and Sec7 domain 1	6	90609592	90760117
ENSMUSG00000057370	0.442714	1.56146	0.987937	0.504351	2.17302	1.78531	NA	NA	6	90794972	90795454
ENSMUSG00000030091	793.687	826.964	1038.23	865.15	482.918	527.271	NA	nucleoporin 210	6	90963062	91066823
ENSMUSG00000034245	449.294	696.03	751.427	1271.44	2019.1	2133.77	NA	histone deacetylase 11	6	91106659	91124686
ENSMUSG00000064080	213.043	312.351	227.208	203.532	75.4254	66.944	NA	fibulin 2	6	91162449	91222534
ENSMUSG00000030093	299.92	288.695	242.068	213.57	302.408	255.934	NA	wingless-related MMTV integration site 7A	6	91313975	91361357
ENSMUSG00000034203	187.447	292.261	286.711	268.621	386.666	392.704	NA	coiled-coil-helix-coiled-coil-helix domain containing 4	6	91414270	91423417
ENSMUSG00000030095	504.865	613.299	666.584	537.156	454.13	435.966	NA	transmembrane protein 43	6	91423697	91438453
ENSMUSG00000030094	431.752	354.871	408.362	289.454	308.557	277.01	NA	xeroderma pigmentosum, complementation group C	6	91439299	91465878
ENSMUSG00000090846	189.335	162.309	137.95	149.447	121.877	106.895	NA	NA	6	91466029	91472614
ENSMUSG00000030096	1243.72	1566.43	2006.55	2052.16	1454.41	1429.26	NA	solute carrier family 6 (neurotransmitter transporter, taurine), member 6	6	91634061	91709057
ENSMUSG00000030098	156.701	337.601	363.929	275.167	138.948	152.908	NA	glutamate receptor interacting protein 2	6	91711503	91777244
ENSMUSG00000034083	428.647	374.619	346.668	285.82	316.613	267.351	NA	RIKEN cDNA C130022K22 gene	6	91828047	91849842
ENSMUSG00000034063	0	2.27208	0.987937	2.89775	0.31524	3.97962	NA	RIKEN cDNA 4930590J08 gene	6	91864753	91900634
ENSMUSG00000034037	392.761	375.793	458.324	395.329	109.792	117.843	NA	FYVE, RhoGEF and PH domain containing 5	6	91928872	92025998
ENSMUSG00000005893	2792.38	2635.71	2843.87	2556.06	2909.91	3053.55	NA	nuclear receptor subfamily 2, group C, member 2	6	92041384	92123051
ENSMUSG00000014551	320.162	337.409	295.802	353.956	553.259	541.942	NA	mitochondrial ribosomal protein S25	6	92119519	92134027
ENSMUSG00000014550	1021.26	1006.47	1066.82	951.38	1262.08	1106.92	NA	zinc finger, FYVE domain containing 20	6	92136706	92164919
ENSMUSG00000005892	12.6357	27.7932	42.3692	52.0366	88.3696	92.3492	NA	thyrotropin releasing hormone	6	92192055	92194644
ENSMUSG00000030020	859.248	1259.25	1463.49	1936.24	3483.2	3775.95	NA	prickle homolog 2 (Drosophila)	6	92320886	92656139
ENSMUSG00000030022	245.56	254.32	186.174	283.311	116.13	150.175	NA	a disintegrin-like and metallopeptidase (reprolysin type) with thrombospondin type 1 motif, 9	6	92722693	92893486
ENSMUSG00000048636	1.64992	3.80089	2.96381	3.90645	1.76392	1.52748	NA	NA	6	92766472	92797168
ENSMUSG00000079462	2.09263	2.41229	0.538156	1.63778	1.85778	3.78578	NA	NA	6	92819351	92834405
ENSMUSG00000045095	1729.94	1464.26	1603.17	1425.24	1343.45	1401.68	NA	membrane associated guanylate kinase, WW and PDZ domain containing 1	6	93625449	94233316
ENSMUSG00000045100	43.9043	53.0761	57.8464	64.5134	109.168	128.856	NA	solute carrier family 25 (mitochondrial carrier, phosphate carrier), member 26	6	94450308	94554642
ENSMUSG00000030029	660.454	950.997	1143.83	1537.2	1628.99	1558.68	NA	leucine-rich repeats and immunoglobulin-like domains 1	6	94554523	94650152
ENSMUSG00000030031	243.823	243.487	200.237	236.005	276.934	286.41	NA	kelch repeat and BTB (POZ) domain containing 8	6	95067234	95079712
ENSMUSG00000068181	0	0	0	0	0	0	NA	NA	6	95272106	95272204
ENSMUSG00000061838	176.943	175.338	170.689	274.746	302.293	311.348	NA	succinate-Coenzyme A ligase, GDP-forming, beta subunit	6	95423006	95668792
ENSMUSG00000059187	137.347	281.963	299.031	448.134	699.349	633.505	NA	family with sequence similarity 19, member A1	6	96063148	96607192
ENSMUSG00000072878	0	0	0.538156	0	0.31524	1.76398	NA	NA	6	96114497	96116199
ENSMUSG00000046500	16.4193	22.0851	23.6221	32.1338	39.4297	35.3417	NA	family with sequence similarity 19, member A4	6	96781203	97010405
ENSMUSG00000035245	246.076	345.33	363.738	382.814	382.922	394.377	NA	EGF domain-specific O-linked N-acetylglucosamine (GlcNAc) transferase	6	97060018	97099176
ENSMUSG00000030059	1232.55	1160.04	1262.57	1387.58	1983	1648.1	NA	TATA element modulatory factor 1	6	97105260	97129118
ENSMUSG00000030061	1039.48	1034.53	987.743	1017.63	1491.48	1402.7	NA	ubiquitin-like modifier activating enzyme 3	6	97133664	97155636
ENSMUSG00000035199	365.751	510.024	497.259	483.751	845.567	936.918	NA	ADP-ribosylation factor-like 6 interacting protein 5	6	97160683	97183309
ENSMUSG00000044086	0.885429	0	0.538156	1.51124	0.409102	0.45166	NA	leiomodin 3 (fetal)	6	97188522	97202774
ENSMUSG00000030064	1096.85	824.311	717.614	411.852	334.493	341.958	NA	FERM domain containing 4B	6	97236861	97567535
ENSMUSG00000035158	63.0576	47.2931	42.5855	82.3013	237.416	216.929	NA	microphthalmia-associated transcription factor	6	97757052	97971352
ENSMUSG00000090667	0.442714	0.355313	0	0	2.26689	3.0763	NA	predicted gene 765	6	98188008	98292748
ENSMUSG00000030067	1242.85	1811.78	1930.59	1433.09	1018.52	1199.33	NA	forkhead box P1	6	98875332	99472715
ENSMUSG00000093661	129.095	157.905	167.627	172.636	191.348	235.539	NA	eukaryotic translation initiation factor 4E member 3	6	99575129	99616765
ENSMUSG00000072875	296.154	557.143	507.433	413.8	259.987	250.35	NA	G protein-coupled receptor 27	6	99642673	99643812
ENSMUSG00000030069	2.09263	5.50255	5.47784	3.65337	2.99123	1.74265	NA	prokineticin 2	6	99661293	99676386
ENSMUSG00000072872	872.188	941.015	955.87	861.64	724.347	683.02	NA	RING1 and YY1 binding protein	6	100178560	100237435
ENSMUSG00000035378	97.4252	83.6273	72.7538	74.5823	92.2464	87.8984	NA	SHQ1 homolog (S. cerevisiae)	6	100523075	100621151
ENSMUSG00000030074	24.1852	20.7388	13.7427	24.9554	17.0087	15.1663	NA	glucoside xylosyltransferase 2	6	100654728	100755075
ENSMUSG00000052144	1685.79	1369.26	1277.04	1140.14	1521.1	1439.18	NA	protein phosphatase 4, regulatory subunit 2	6	100783632	100818711
ENSMUSG00000035357	757.752	442.978	465.702	546.475	508.289	522.532	NA	PDZ domain containing RING finger 3	6	101099601	101327891
ENSMUSG00000052236	0	0	0.538156	0	1.2273	0.881989	NA	NA	6	101746219	101751604
ENSMUSG00000030075	189.618	319.229	365.84	421.443	559.415	589.798	NA	contactin 3	6	102113300	102414661
ENSMUSG00000030077	8091.5	12603.4	12613.4	11674.2	3923.47	3492.72	NA	cell adhesion molecule with homology to L1CAM	6	103460870	103699671
ENSMUSG00000030092	217.865	478.353	572.868	718.162	630.018	560.712	NA	contactin 6	6	104442784	104813400
ENSMUSG00000064293	314.692	503.721	574.716	634.932	837.275	881.98	NA	contactin 4	6	105627654	106649304
ENSMUSG00000005364	9.13503	10.2618	4.30525	6.67585	4.15832	6.43175	NA	interleukin 5 receptor, alpha	6	106660378	106695103
ENSMUSG00000013736	594.004	644.819	600.464	670.634	870.97	787.949	NA	tRNA nucleotidyl transferase, CCA-adding, 1	6	106719114	106732468
ENSMUSG00000005362	632.801	693.416	732.904	716.989	1413.65	1356.95	NA	cereblon	6	106728243	106750068
ENSMUSG00000034648	780.557	771.909	782.813	988.621	925.004	852.226	NA	leucine rich repeat protein 1, neuronal	6	107479779	107520204
ENSMUSG00000034639	46.7593	36.966	39.9752	34.2759	54.3327	58.1241	NA	SET domain and mariner transposase fusion gene	6	108015039	108027116
ENSMUSG00000030101	141.371	144.778	164.247	222.415	381.843	372.963	NA	sulfatase modifying factor 1	6	108057022	108135576
ENSMUSG00000030102	964.715	1922.69	1615.27	2804.78	17664.9	17859	NA	inositol 1,4,5-trisphosphate receptor 1	6	108163112	108501103
ENSMUSG00000030103	57.907	114.699	102.078	173.26	473.486	649.432	NA	basic helix-loop-helix family, member e40	6	108610623	108616919
ENSMUSG00000030105	1162.9	1360.12	1377.06	1788.01	3027.08	2807.37	NA	ADP-ribosylation factor-like 8B	6	108733053	108773717
ENSMUSG00000030104	350.589	358.868	356.339	457.99	474.681	413.331	NA	ER degradation enhancer, mannosidase alpha-like 1	6	108778635	108809350
ENSMUSG00000056755	365.436	849.419	842.693	1202.04	1109.38	1185.6	NA	glutamate receptor, metabotropic 7	6	110595575	111517224
ENSMUSG00000057604	46.3597	36.5358	37.8146	55.0791	57.8198	72.1738	NA	LIM and cysteine-rich domains 1	6	112223752	112280419
ENSMUSG00000044574	0	1.80922	3.32522	0.37781	1.67006	1.09715	NA	NA	6	112235851	112238831
ENSMUSG00000034387	1.9717	2.02432	2.06425	0.75562	0.31524	2.38814	NA	RIKEN cDNA D630042P16 gene	6	112309318	112338017
ENSMUSG00000091626	24.7488	29.2567	22.5458	25.7092	26.0161	41.0445	NA	NA	6	112387465	112389330
ENSMUSG00000062694	0.885429	0	0	0	2.07916	2.21564	NA	caveolin 3	6	112409495	112422865
ENSMUSG00000049112	26.3188	76.8302	95.2759	140.869	127.344	119.239	NA	oxytocin receptor	6	112423678	112440884
ENSMUSG00000030254	184.426	164.31	164.286	179.075	86.3578	95.751	NA	RAD18 homolog (S. cerevisiae)	6	112569844	112646680
ENSMUSG00000030257	2200.3	2321.53	2938.64	2714.69	1604.78	2167.95	NA	SLIT-ROBO Rho GTPase activating protein 3	6	112667965	112897260
ENSMUSG00000030264	426.556	401.65	377.824	360.014	378.329	358.367	NA	THUMP domain containing 3	6	112996219	113018267
ENSMUSG00000034269	1740.83	1680.53	1855.51	1682.3	1119.23	1234.02	NA	SET domain containing 5	6	113027359	113103429
ENSMUSG00000042873	1373.21	1449.69	1643.57	1509.96	1166.23	1040.16	NA	lipoma HMGIC fusion partner-like protein 4	6	113118084	113145378
ENSMUSG00000030269	277.951	266.427	267.578	264.242	227.679	210.666	NA	myotubularin related protein 14	6	113187837	113231386
ENSMUSG00000030270	12.6357	42.2861	39.4291	103.726	217.841	265.461	NA	copine family member IX	6	113232301	113255621
ENSMUSG00000001632	712.23	569.125	640.583	587.622	600.894	546.577	NA	bromodomain and PHD finger containing, 1	6	113257175	113274851
ENSMUSG00000030271	51.1475	47.9615	52.3607	48.1392	40.657	39.1525	NA	8-oxoguanine DNA-glycosylase 1	6	113276966	113285062
ENSMUSG00000030272	386.766	571.845	566.85	666.659	744.74	856.746	NA	calcium/calmodulin-dependent protein kinase I	6	113284118	113293978
ENSMUSG00000048930	285.715	302.356	365.062	295.119	149.9	185.301	NA	transcriptional adaptor 3	6	113316019	113327877
ENSMUSG00000079426	934.626	1132.64	1127.68	1167.89	1844.63	1715.36	NA	actin related protein 2/3 complex, subunit 4	6	113328107	113340442
ENSMUSG00000030276	89.1756	97.4941	120.191	90.6077	76.7607	95.1306	NA	tubulin tyrosine ligase-like family, member 3	6	113339254	113364577
ENSMUSG00000051169	53.1603	56.6292	84.6737	74.3474	75.8221	75.1203	NA	RNA pseudouridylate synthase domain containing 3	6	113365313	113369342
ENSMUSG00000030278	0	0	0.449781	0	0.31524	0	NA	cell death-inducing DFFA-like effector c	6	113374628	113385754
ENSMUSG00000051256	212.598	232.356	209.458	246.738	263.427	262.061	NA	jagunal homolog 1 (Drosophila)	6	113392563	113398223
ENSMUSG00000043088	0	0.710625	0.987937	1.76432	2.30054	2.40947	NA	interleukin 17 receptor E	6	113408478	113420745
ENSMUSG00000030281	6.59968	15.9372	12.7548	20.5428	33.4207	41.5833	NA	interleukin 17 receptor C	6	113421421	113433134
ENSMUSG00000030284	196.699	278.097	249.184	318.31	333.682	386.717	NA	cysteine-rich with EGF-like domains 1	6	113433291	113443332
ENSMUSG00000045009	71.5102	145.143	167.668	231.488	407.05	435.352	NA	proline-rich transmembrane protein 3	6	113444089	113451887
ENSMUSG00000030286	437.058	487.799	538.929	639.789	674.854	737.544	NA	ER membrane protein complex subunit 3	6	113464868	113481632
ENSMUSG00000034023	163.945	94.4461	75.4525	146.18	56.3853	58.7501	NA	Fanconi anemia, complementation group D2	6	113481676	113547011
ENSMUSG00000033963	0	0	0.449781	1.63778	0.409102	0.215165	NA	RIKEN cDNA 4931417G12 gene	6	113546755	113550709
ENSMUSG00000033940	663.991	738.969	783.587	853.508	1514.64	1470.74	NA	RIKEN cDNA 6720456B07 gene	6	113554766	113566942
ENSMUSG00000033933	949.477	1026.89	976.718	886.767	1197.37	1089.85	NA	von Hippel-Lindau tumor suppressor	6	113573953	113581627
ENSMUSG00000060477	19.0345	37.2464	43.9269	70.9435	175.204	209.161	NA	interleukin-1 receptor-associated kinase 2	6	113588461	113645003
ENSMUSG00000056952	753.372	884.588	1022.3	909.847	925.035	898.361	NA	TatD DNase domain containing 2	6	113647044	113661063
ENSMUSG00000064177	0.442714	0.958386	3.14056	2.26686	2.67599	1.95781	NA	ghrelin	6	113666113	113669874
ENSMUSG00000030298	919.25	819.229	724.038	770.398	783.197	789.513	NA	SEC13 homolog (S. cerevisiae)	6	113678061	113690737
ENSMUSG00000030302	1355.99	2454.87	2982.32	5510.87	13295.7	13960	NA	ATPase, Ca++ transporting, plasma membrane 2	6	113695663	113992607
ENSMUSG00000030307	383.984	1297.86	1809.96	3586.09	1754.42	1703.32	NA	solute carrier family 6 (neurotransmitter transporter, GABA), member 11	6	114081235	114199880
ENSMUSG00000030310	1208.29	2085.62	2532.37	3844.93	4539.74	4032.74	NA	solute carrier family 6 (neurotransmitter transporter, GABA), member 1	6	114232629	114267516
ENSMUSG00000053004	5.59331	13.4174	19.6704	28.4732	94.2724	99.4904	NA	histamine receptor H1	6	114347930	114433290
ENSMUSG00000030314	143.543	141.234	155.772	177.181	201.569	214.796	NA	autophagy related 7	6	114593149	114810431
ENSMUSG00000030315	601.338	510.727	469.799	457.547	408.893	463.027	NA	vestigial like 4 (Drosophila)	6	114810646	114920012
ENSMUSG00000030316	179.075	172.538	164.118	158.527	102.904	100.14	NA	RIKEN cDNA 1500001M20 gene	6	114954399	114987894
ENSMUSG00000009394	577.381	1239.39	1392.01	2296.83	5233.76	5094.59	NA	synapsin II	6	115084920	115232644
ENSMUSG00000092004	0	1.77656	1.52609	0.37781	0.31524	1.50615	NA	NA	6	115177361	115209312
ENSMUSG00000030317	37.7473	103.936	174.256	270.328	747.104	584.6	NA	tissue inhibitor of metalloproteinase 4	6	115195634	115201867
ENSMUSG00000000440	3.1789	4.29641	4.1364	8.19072	23.1187	32.6549	NA	peroxisome proliferator activated receptor gamma	6	115311239	115440419
ENSMUSG00000042389	218.109	258.199	242.903	193.799	197.136	217.446	NA	tRNA splicing endonuclease 2 homolog (S. cerevisiae)	6	115494682	115528368
ENSMUSG00000068011	1.20721	2.98271	0.987937	2.51994	2.99123	2.21564	NA	RIKEN cDNA 2510049J12 gene	6	115533562	115542594
ENSMUSG00000000439	417.868	477.213	554.955	478.185	538.216	452.319	NA	makorin, ring finger protein, 2	6	115551949	115568688
ENSMUSG00000000441	2425.57	2277.26	2320.85	1811.39	1412.1	1356.57	NA	v-raf-leukemia viral oncogene 1	6	115568085	115626653
ENSMUSG00000059900	2.53535	4.65172	5.11643	9.07288	16.4721	19.8341	NA	transmembrane protein 40	6	115679149	115712484
ENSMUSG00000030319	273.483	152.207	145.074	136.737	37.3913	41.5193	NA	cullin-associated and neddylation-dissociated 2 (putative)	6	115724556	115754911
ENSMUSG00000057841	3531.98	3637.33	3125.29	2630.77	2047.59	2350.58	NA	ribosomal protein L32	6	115755523	115758765
ENSMUSG00000030322	184.426	155.545	164.037	128.02	153.327	158.434	NA	methyl-CpG binding domain protein 4	6	115790715	115803389
ENSMUSG00000030323	479.198	545.062	536.859	534.882	528.196	501.505	NA	intraflagellar transport 122	6	115803488	115876717
ENSMUSG00000030324	3.74255	4.75927	1.97587	4.66207	0.724341	1.31232	NA	rhodopsin	6	115881945	115888847
ENSMUSG00000042279	0.764492	0.603073	0	0.37781	0	0	NA	H1 histone family, member O, oocyte-specific	6	115894956	115900254
ENSMUSG00000030123	579.236	669.535	690.548	904.925	557.931	705.977	NA	plexin D1	6	115904829	115945023
ENSMUSG00000030126	929.531	912.922	933.405	759.723	956.714	1004.59	NA	transmembrane and coiled coil domains 1	6	115968636	116143504
ENSMUSG00000024104	1188.94	1307.71	1513.2	1469.23	2758.79	2163.99	NA	DNA segment, Chr 6, Wayne State University 116, expressed	6	116158051	116212686
ENSMUSG00000042213	89.2965	94.9742	91.3479	98.0319	94.198	124.296	NA	zinc finger, AN1-type domain 4	6	116214240	116280316
ENSMUSG00000025702	1323.72	1418.7	1364.55	1434.88	1808.62	1674.67	NA	membrane-associated ring finger (C3HC4) 8	6	116288042	116359558
ENSMUSG00000025701	4.18527	3.83354	3.05219	9.57905	24.4399	15.8331	NA	arachidonate 5-lipoxygenase	6	116360095	116411196
ENSMUSG00000053391	0	0	0	0	0	0	NA	olfactory receptor 211	6	116443629	116444558
ENSMUSG00000053251	1.64992	1.56146	0.538156	1.51124	0.409102	1.78531	NA	olfactory receptor 212	6	116456534	116467983
ENSMUSG00000081649	0	0	0	0	0	0	NA	olfactory receptor 213	6	116490473	116491456
ENSMUSG00000051046	0	0	0	0	0	0	NA	olfactory receptor 214	6	116506423	116507430
ENSMUSG00000050654	0	0	0	0	0	0	NA	olfactory receptor 215	6	116531956	116533049
ENSMUSG00000059878	926.27	618.162	616.752	488.455	261.167	241.752	NA	zinc finger protein 422	6	116574034	116579017
ENSMUSG00000042129	203.221	205.605	234.318	513.154	122.931	144.417	NA	Ras association (RalGDS/AF-6) domain family member 4	6	116583026	116623854
ENSMUSG00000048489	11.2277	15.8719	4.22478	5.29478	3.52784	9.70188	NA	RIKEN cDNA 8430408G22 gene	6	116600702	116602865
ENSMUSG00000048108	53.6418	42.3514	56.5933	25.5899	33.1993	32.2691	NA	transmembrane protein 72	6	116642648	116666931
ENSMUSG00000061353	357.581	340.086	191.65	338.821	640.263	488.748	NA	chemokine (C-X-C motif) ligand 12	6	117118553	117131385
ENSMUSG00000090549	0	0	0	0	0	0	NA	NA	6	117163674	117164066
ENSMUSG00000072829	1612.06	1940.13	2328.66	2760.06	5213.96	4683.25	NA	NA	6	117666491	117667485
ENSMUSG00000059689	454.367	428.681	407.158	364.025	350.718	359.169	NA	zinc finger protein 637	6	117791198	117795974
ENSMUSG00000042097	169.817	186.157	213.595	236.515	453.098	452.131	NA	zinc finger protein 239	6	117812118	117822784
ENSMUSG00000042079	1612.41	1223.26	1012.94	1200.18	940.935	778.74	NA	heterogeneous nuclear ribonucleoprotein F	6	117850358	117875639
ENSMUSG00000042087	2.21357	4.57682	4.66665	8.69144	8.59823	12.627	NA	NA	6	117857128	117857778
ENSMUSG00000004988	0	0	0.538156	0	0.409102	1.09715	NA	FXYD domain-containing ion transport regulator 4	6	117883747	117887353
ENSMUSG00000030134	99.5178	290.696	336.942	501.803	2646.62	2855.09	NA	RasGEF domain family, member 1A	6	117961392	118041564
ENSMUSG00000042042	277.828	347.466	350.058	352.427	465.794	426.561	NA	chondroitin sulfate N-acetylgalactosaminyltransferase 2	6	118057470	118089158
ENSMUSG00000030110	143.502	243.413	300.558	417.075	236.628	219.898	NA	ret proto-oncogene	6	118101766	118147762
ENSMUSG00000030138	888.929	737.757	722.5	639.674	537.398	482.933	NA	BMS1 homolog, ribosome assembly protein (yeast)	6	118333401	118369435
ENSMUSG00000030145	269.656	299.902	303.882	276.093	216.854	225.19	NA	zinc finger protein 248	6	118377337	118405546
ENSMUSG00000072623	422.494	505.031	595.612	417.087	391.642	331.306	NA	zinc finger protein 9	6	118411968	118429338
ENSMUSG00000007827	607.68	529.103	536.687	504.736	395.767	374.125	NA	ankyrin repeat domain 26	6	118452582	118512274
ENSMUSG00000051331	704.067	1001.65	1050.35	892.208	1053.69	1187.7	NA	calcium channel, voltage-dependent, L type, alpha 1C subunit	6	118542314	119146249
ENSMUSG00000041477	192.434	190.959	225.04	133.065	100.289	115.647	NA	DCP1 decapping enzyme homolog B (S. cerevisiae)	6	119125270	119171632
ENSMUSG00000041460	5.59331	5.25479	7.99187	12.2237	69.7989	68.4288	NA	calcium channel, voltage-dependent, alpha 2/delta subunit 4	6	119186544	119302425
ENSMUSG00000055003	84.5087	213.342	254.398	373.6	444.863	530.008	NA	leucine-rich repeats and transmembrane domains 2	6	119265151	119280784
ENSMUSG00000030168	884.109	894.855	795.706	850.427	1081.52	903.467	NA	adiponectin receptor 2	6	119303168	119367501
ENSMUSG00000030170	39.6802	39.6491	26.859	26.087	29.3562	30.0961	NA	wingless-related MMTV integration site 5B	6	119382549	119494336
ENSMUSG00000030019	605.041	424.286	402.523	336.693	460.745	426.292	NA	F-box and leucine-rich repeat protein 14	6	119429686	119433904
ENSMUSG00000030172	1934.66	2443.95	2630.39	2813.53	1466.48	1275.13	NA	ELKS/RAB6-interacting/CAST family member 1	6	119520822	119798168
ENSMUSG00000050604	9.45681	7.31177	4.57828	6.80421	4.25219	1.72132	NA	NA	6	119798211	119799031
ENSMUSG00000030166	120.282	124.844	111.058	101.938	137.492	153.359	NA	RAD52 homolog (S. cerevisiae)	6	119852716	119872846
ENSMUSG00000045962	1952.23	1751.8	1681.6	1828.33	2158.51	2688	NA	WNK lysine deficient protein kinase 1	6	119873987	119988690
ENSMUSG00000041377	0	0	0	1.38651	16.2773	19.7488	NA	ninjurin 2	6	120043368	120150357
ENSMUSG00000041372	7.16333	10.5845	10.9557	12.2219	9.45009	8.19573	NA	beta-1,4-N-acetyl-galactosaminyl transferase 3	6	120153091	120244577
ENSMUSG00000030177	201.649	143.464	127.733	130.813	101.073	111.819	NA	coiled-coil domain containing 77	6	120274341	120314392
ENSMUSG00000030180	2003.28	1482.24	1467.15	1098.95	1651.15	1568.73	NA	lysine (K)-specific demethylase 5A	6	120314117	120394592
ENSMUSG00000002897	80.2824	68.4948	59.2116	52.6766	163.903	193.365	NA	interleukin 17 receptor A	6	120413215	120433745
ENSMUSG00000058979	180.325	222.192	219.29	219.24	285.231	328.681	NA	cat eye syndrome chromosome region, candidate 5	6	120459512	120481337
ENSMUSG00000071226	307.723	141.664	139.066	203.317	120.878	116.833	NA	cat eye syndrome chromosome region, candidate 2	6	120616387	120721208
ENSMUSG00000004902	40.2827	152.543	200.897	454.085	559.663	713.825	NA	solute carrier family 25 (mitochondrial carrier), member 18	6	120723786	120744000
ENSMUSG00000019210	1173.67	1528.16	1456.15	1727.87	3934.33	3668.74	NA	ATPase, H+ transporting, lysosomal V1 subunit E1	6	120745263	120772703
ENSMUSG00000009112	610.103	508.392	570.111	660.202	579.142	639.074	NA	BCL2-like 13 (apoptosis facilitator)	6	120786248	120842860
ENSMUSG00000004446	149.94	206.502	202.358	166.837	78.1758	68.6245	NA	BH3 interacting domain death agonist	6	120841948	120866871
ENSMUSG00000051586	630.423	754.026	765.904	665.455	394.83	460.585	NA	microtubule associated monoxygenase, calponin and LIM domain containing 3	6	120881725	120953171
ENSMUSG00000003178	643.503	642.249	646.261	550.372	525.185	558.212	NA	microtubule associated monoxygenase, calponin and LIM domain containing 3	6	120951381	121031627
ENSMUSG00000067825	265.035	303.589	298.141	224.147	225.532	204.687	NA	peroxisomal biogenesis factor 26	6	121133685	121148855
ENSMUSG00000030137	4.50705	2.73495	11.6706	29.1168	124.266	109.847	NA	tubulin, alpha 8	6	121160752	121176872
ENSMUSG00000030107	3.54171	12.5992	7.81512	6.29986	29.0481	15.7905	NA	ubiquitin specific peptidase 18	6	121195924	121220934
ENSMUSG00000030108	179.239	191.477	65.7183	161.973	119.879	147.084	NA	solute carrier family 6 (neurotransmitter transporter, GABA), member 13	6	121250245	121287751
ENSMUSG00000030109	6.59968	16.6152	7.00393	29.4982	18.739	22.3307	NA	solute carrier family 6 (neurotransmitter transporter, betaine/GABA), member 12	6	121293094	121315793
ENSMUSG00000040797	473.644	689.275	909.786	981.726	1186.2	1517.53	NA	IQ motif and Sec7 domain 3	6	121322948	121423696
ENSMUSG00000030111	205.273	290.575	201.828	254.572	280.134	239.553	NA	alpha-2-macroglobulin	6	121586191	121629255
ENSMUSG00000059908	13.2814	11.4584	27.9841	3.52683	1.9853	9.70374	NA	murinoglobulin 1	6	121788559	121839075
ENSMUSG00000030131	5.31257	4.57682	4.75503	0.882161	0	3.22747	NA	murinoglobulin 2	6	121956816	122035985
ENSMUSG00000030114	1.77086	6.24584	4.4899	6.04677	2.3944	1.52748	NA	killer cell lectin-like receptor subfamily G, member 1	6	122220614	122232900
ENSMUSG00000007458	508.009	534.543	488.699	591.514	1357.7	1393.06	NA	mannose-6-phosphate receptor, cation dependent	6	122258738	122267698
ENSMUSG00000040669	597.418	543.274	665.384	442.319	211.134	254.941	NA	polyhomeotic-like 1 (Drosophila)	6	122267749	122290579
ENSMUSG00000040657	0	0	0.987937	0	0	0	NA	NA	6	122341397	122342705
ENSMUSG00000040649	2712.59	2907.71	2966.03	2530.62	712.991	583.357	NA	ribosomal modification protein rimK-like family member B	6	122397314	122436340
ENSMUSG00000030116	7.48511	8.2375	4.85131	8.31908	10.0469	8.06774	NA	microfibrillar associated protein 5	6	122455863	122479308
ENSMUSG00000040627	2.97806	2.73495	7.18859	0	0.409102	0.666825	NA	activation-induced cytidine deaminase	6	122503819	122514198
ENSMUSG00000040613	27.1632	13.525	15.8954	16.6345	22.9575	21.8346	NA	apolipoprotein B mRNA editing enzyme, catalytic polypeptide 1	6	122527810	122552462
ENSMUSG00000030117	2.41441	2.51984	3.32522	3.15084	1.35482	2.23697	NA	growth differentiation factor 3	6	122555421	122560105
ENSMUSG00000046323	0	0	0	0	0	0	NA	developmental pluripotency-associated 3	6	122576428	122580290
ENSMUSG00000012396	4.18527	8.0224	1.43772	3.52865	6.80066	1.52748	NA	Nanog homeobox	6	122657507	122664651
ENSMUSG00000003153	641.409	1243.45	1310.84	1797.36	3693.83	2888.6	NA	solute carrier family 2 (facilitated glucose transporter), member 3	6	122677827	122751658
ENSMUSG00000003154	227.646	313.717	326.613	297.518	266.848	288.432	NA	forkhead box J2	6	122769932	122795384
ENSMUSG00000040552	22.898	27.9756	19.4052	30.2502	22.5821	18.0488	NA	complement component 3a receptor 1	6	122797156	122806179
ENSMUSG00000030327	679.197	1028.61	1098.64	1253.02	2442.92	2310.97	NA	NECAP endocytosis associated 1	6	122824492	122838952
ENSMUSG00000049249	0	0	0	0	0	0	NA	NA	6	122850154	122850423
ENSMUSG00000049037	5.19163	2.02432	2.42565	2.39522	2.48826	2.90379	NA	C-type lectin domain family 4, member a1	6	122871866	122884637
ENSMUSG00000043832	2.85713	3.23047	2.6024	5.16461	13.0045	10.5199	NA	C-type lectin domain family 4, member a3	6	122902533	122919893
ENSMUSG00000059639	0	0	0	0	0.409102	0	NA	C-type lectin domain family 4, member a4	6	122940385	122974123
ENSMUSG00000030147	0	0	0	0	0.31524	0.430329	NA	C-type lectin domain family 4, member b1	6	122999980	123021573
ENSMUSG00000030148	6.39884	4.89948	3.50197	4.40899	7.46479	5.93743	NA	C-type lectin domain family 4, member a2	6	123056446	123094017
ENSMUSG00000067767	0	0	0	0	0	0	NA	C-type lectin domain family 4, member b2	6	123122911	123154689
ENSMUSG00000023349	2.53535	1.56146	0.538156	2.01741	5.35198	4.60378	NA	C-type lectin domain family 4, member n	6	123179861	123197039
ENSMUSG00000030144	0.442714	0.355313	0	0	0	0	NA	C-type lectin domain family 4, member d	6	123212125	123225286
ENSMUSG00000030142	0.442714	0.603073	0	0.882161	0.409102	0.45166	NA	C-type lectin domain family 4, member e	6	123231807	123239888
ENSMUSG00000091260	0	0	0	0	0	0	NA	vomeronasal 2, receptor 19	6	123258351	123286555
ENSMUSG00000090280	0	0	0	0	0	0.215165	NA	NA	6	123335280	123368079
ENSMUSG00000090960	0	0	0	0	0	0	NA	NA	6	123442526	123483424
ENSMUSG00000091719	0	0	0	0	0	0	NA	NA	6	123559776	123600653
ENSMUSG00000091620	0	0	0	0	0	0	NA	vomeronasal 2, receptor 23	6	123652839	123692309
ENSMUSG00000072780	0	0	0	0	0	0	NA	vomeronasal 2, receptor 24	6	123728989	123766298
ENSMUSG00000072779	0	0	0	0	0	0	NA	NA	6	123772832	123803208
ENSMUSG00000030141	0	0	0	0	0	0	NA	NA	6	123974776	124012053
ENSMUSG00000072778	0	0	0	0	0.945719	1.74265	NA	vomeronasal 2, receptor27	6	124141614	124181802
ENSMUSG00000008845	11.2277	25.5633	11.2287	24.706	29.0002	30.9123	NA	CD163 antigen	6	124254669	124280545
ENSMUSG00000079346	0	0	0	0	0	0	NA	RIKEN cDNA 1700013D24 gene	6	124297611	124307104
ENSMUSG00000005069	1004.29	1026.64	1037.06	914.182	1201.14	983.999	NA	peroxisomal biogenesis factor 5	6	124346834	124365085
ENSMUSG00000008153	1412.84	2440.61	3213.95	4380.05	6030	5360.41	NA	calsyntenin 3	6	124380777	124414812
ENSMUSG00000038527	3.29984	3.12292	3.14056	3.15084	2.89737	5.46444	NA	complement component 1, r subcomponent-like	6	124443131	124460661
ENSMUSG00000055172	2.97806	4.18886	5.74297	5.29297	13.7288	16.3275	NA	complement component 1, r subcomponent A	6	124462423	124473458
ENSMUSG00000092005	0	0	0	0.504351	0.409102	0	NA	NA	6	124462790	124531062
ENSMUSG00000038521	10.3422	5.36234	9.15656	10.2099	15.305	13.7242	NA	complement component 1, s subcomponent	6	124480363	124586998
ENSMUSG00000079343	0.442714	2.51984	2.33728	2.77121	1.35482	1.31232	NA	predicted gene 5077	6	124574584	124587055
ENSMUSG00000004270	169.173	192.478	189.234	200.115	165.527	153.939	NA	lysophosphatidylcholine acyltransferase 3	6	124613045	124654436
ENSMUSG00000004268	496.11	410.264	365.915	328.735	431.971	400.781	NA	EMG1 nucleolar protein homolog (S. cerevisiae)	6	124654399	124662196
ENSMUSG00000004264	1092.11	1104.06	1118.6	1061.28	699.363	716.805	NA	prohibitin 2	6	124662340	124666968
ENSMUSG00000004266	32.9984	26.8117	17.9596	46.7564	64.5939	51.3279	NA	protein tyrosine phosphatase, non-receptor type 6	6	124670725	124688732
ENSMUSG00000072772	378.238	472.213	396.701	373.942	356.876	354.779	NA	gene rich cluster, C10 gene	6	124689201	124691392
ENSMUSG00000004263	553.086	610.199	816.656	545.059	172.71	224.393	NA	atrophin 1	6	124689207	124706542
ENSMUSG00000004267	408.737	1060.46	1263.67	2210.28	8683.47	8279.14	NA	enolase 2, gamma neuronal	6	124710071	124719691
ENSMUSG00000030125	38.0281	53.7118	68.8905	75.7502	25.4795	29.4061	NA	leucine rich repeat containing 23	6	124719881	124729745
ENSMUSG00000038451	26.3987	32.37	29.2688	28.2255	41.4486	37.689	NA	splA/ryanodine receptor domain and SOCS box containing 2	6	124758679	124760637
ENSMUSG00000023456	1854.89	2625.73	1996.99	3050.98	7318.36	6686.84	NA	triosephosphate isomerase 1	6	124760604	124764314
ENSMUSG00000038429	2321.12	2629.51	2815.71	2978.37	3466.12	3326.94	NA	ubiquitin specific peptidase 5 (isopeptidase T)	6	124765037	124779502
ENSMUSG00000023505	174.157	84.5491	60.28	116.097	7.27707	6.62558	NA	cell division cycle associated 3	6	124779565	124783719
ENSMUSG00000023439	4.06433	6.35339	7.27696	3.27738	3.30647	2.8398	NA	guanine nucleotide binding protein (G protein), beta 3	6	124784258	124790293
ENSMUSG00000023191	392.204	406.221	459.76	324.803	163.133	190.965	NA	leprecan-like 2	6	124791107	124807770
ENSMUSG00000038390	820.742	1126.86	1246.74	1446.92	2147.64	2018.81	NA	G protein-coupled receptor 162	6	124808462	124813935
ENSMUSG00000023274	2.21357	1.66901	1.79912	5.92205	33.3463	43.8611	NA	CD4 antigen	6	124814710	124838239
ENSMUSG00000030124	14.4066	13.9552	12.2166	9.07107	11.9047	17.8123	NA	lymphocyte-activation gene 3	6	124854379	124861723
ENSMUSG00000030122	1951.15	1988.62	2416.54	1836.07	523.054	563.089	NA	parathymosin	6	124863699	124867964
ENSMUSG00000055818	5.27154	8.87323	3.95175	2.64648	6.64659	5.70093	NA	NA	6	124866881	124875862
ENSMUSG00000030120	1469.62	1691.71	1851.1	2095.8	2502.47	2511.54	NA	myeloid leukemia factor 2	6	124881406	124886156
ENSMUSG00000030127	253.116	308.345	297.071	378.556	555.361	615.502	NA	COP9 (constitutive photomorphogenic) homolog, subunit 7a (Arabidopsis thaliana)	6	124908431	124915556
ENSMUSG00000030329	90.9011	131.74	184.211	172.43	99.6917	137.784	NA	RIKEN cDNA C530028O21 gene	6	124946712	124953114
ENSMUSG00000038346	340.32	317.383	345.961	237.036	134.453	180.401	NA	zinc finger protein 384	6	124959163	124987883
ENSMUSG00000030330	777.745	717.151	602.206	442.789	443.809	434.419	NA	inhibitor of growth family, member 4	6	124989778	125001517
ENSMUSG00000072770	48.7309	48.7893	40.1835	31.0058	16.1905	14.199	NA	proacrosin binding protein	6	124999707	125013285
ENSMUSG00000067714	2.09263	0.710625	2.6024	2.77303	1.85778	1.74265	NA	lysophosphatidic acid receptor 5	6	125017938	125032490
ENSMUSG00000063870	6940.05	4756.87	5490.76	4421.24	4039.64	3802.92	NA	chromodomain helicase DNA binding protein 4	6	125045999	125080609
ENSMUSG00000038279	540.889	595.221	585.091	545.204	398.772	385.454	NA	NOP2 nucleolar protein homolog (yeast)	6	125081901	125094771
ENSMUSG00000038271	266.644	265.759	286.879	321.21	614.401	559.592	NA	intermediate filament family orphan 1	6	125095259	125111800
ENSMUSG00000057666	2668.22	3387.13	3394.75	4231.31	4844.05	5392.48	NA	glyceraldehyde-3-phosphate dehydrogenase	6	125111871	125116485
ENSMUSG00000038252	1537.26	805.207	765.776	791.333	247.705	259.888	NA	non-SMC condensin I complex, subunit D2	6	125118027	125141613
ENSMUSG00000030335	384.79	440.756	383.866	448.995	505.13	541.693	NA	mitochondrial ribosomal protein L51	6	125141819	125145601
ENSMUSG00000030337	80.6431	178.06	274.735	678.795	1466.53	1422.45	NA	vesicle-associated membrane protein 1	6	125165569	125194561
ENSMUSG00000038213	33.1193	46.5403	50.2885	47.1305	69.6643	77.7681	NA	TAP binding protein-like	6	125173951	125181878
ENSMUSG00000030336	0	0.355313	0	0	0	0	NA	CD27 antigen	6	125182640	125187028
ENSMUSG00000067702	0	0.603073	0	0.37781	0	0	NA	tubulin, alpha 3A	6	125228292	125236060
ENSMUSG00000030339	91.3503	93.651	105.959	144.174	113.105	120.751	NA	lymphotoxin B receptor	6	125256589	125263903
ENSMUSG00000030340	4.82882	6.07297	13.6623	17.8963	9.32258	10.4327	NA	sodium channel, nonvoltage-gated 1 alpha	6	125270677	125294961
ENSMUSG00000030341	47.4438	42.5761	34.6015	44.8673	28.538	39.4104	NA	tumor necrosis factor receptor superfamily, member 1a	6	125299380	125312502
ENSMUSG00000038167	4.50705	5.96542	3.68662	6.04859	1.03958	2.19431	NA	pleckstrin homology domain containing, family G (with RhoGef domain) member 6	6	125312678	125330811
ENSMUSG00000030342	298.316	461.565	428.138	800.746	897.989	787.531	NA	CD9 antigen	6	125410284	125444809
ENSMUSG00000001930	261.618	547.96	431.632	481.514	437.222	404.275	NA	Von Willebrand factor homolog	6	125496792	125636697
ENSMUSG00000038115	3.62162	15.5493	20.6504	46.5069	71.515	60.8999	NA	anoctamin 2	6	125640437	125990144
ENSMUSG00000049107	14.9292	47.854	48.9629	49.3865	47.2505	32.3971	NA	neurotrophin 3	6	126051431	126116762
ENSMUSG00000045534	28.9341	46.185	53.2444	61.2397	79.0205	77.4639	NA	potassium voltage-gated channel, shaker-related subfamily, member 5	6	126482571	126485573
ENSMUSG00000047976	136.498	162.758	172.367	460.743	3982.7	3590.88	NA	potassium voltage-gated channel, shaker-related subfamily, member 1	6	126586481	126595819
ENSMUSG00000038077	461.127	897.774	1029.94	1436.89	1482.95	1391.83	NA	potassium voltage-gated channel, shaker-related, subfamily, member 6	6	126658347	126690680
ENSMUSG00000000399	657.718	787.674	789.275	926.656	1648.5	1571.56	NA	NADH dehydrogenase (ubiquinone) 1 alpha subcomplex, 9	6	126771881	126799162
ENSMUSG00000030344	1.64992	1.06594	4.67456	3.14902	4.12467	2.86113	NA	A kinase (PRKA) anchor protein 3	6	126803116	126824325
ENSMUSG00000030345	0.442714	0.710625	0.538156	0.882161	1.44868	3.33412	NA	dual-specificity tyrosine-(Y)-phosphorylation regulated kinase 4	6	126826038	126871857
ENSMUSG00000030346	99.3559	79.0601	64.5773	95.1578	20.4427	22.8891	NA	RAD51 associated protein 1	6	126873068	126889605
ENSMUSG00000030347	449.623	513.869	471.574	499.851	698.154	649.603	NA	DNA segment, Chr 6, Wayne State University 163, expressed	6	126889984	126925722
ENSMUSG00000000183	0	0	0	0	0	0	NA	fibroblast growth factor 6	6	126965560	126974736
ENSMUSG00000000182	2.73619	1.3137	3.32522	4.033	1.44868	2.00047	NA	fibroblast growth factor 23	6	127022920	127031426
ENSMUSG00000038028	214.33	207.685	179.121	255.304	390.874	355.573	NA	RIKEN cDNA 9630033F20 gene	6	127035134	127059568
ENSMUSG00000000184	5774.85	2239.28	1661.22	2237.17	581.342	742.209	NA	cyclin D2	6	127075797	127101066
ENSMUSG00000062365	0	0.710625	0	0	0	1.97914	NA	NA	6	127183774	127184637
ENSMUSG00000037997	723.652	737.039	682.19	527.462	279.456	289.339	NA	poly (ADP-ribose) polymerase family, member 11	6	127396858	127444259
ENSMUSG00000061414	3.62162	7.52688	5.47784	9.07107	9.41644	12.9507	NA	EF-hand calcium binding domain 4B	6	127527993	127579956
ENSMUSG00000030350	319.594	389.145	431.189	645.557	817.766	792.177	NA	protein arginine N-methyltransferase 8	6	127639029	127719490
ENSMUSG00000030351	103.502	93.7259	89.372	56.9536	106.083	93.1496	NA	tetraspanin 11	6	127837607	127903049
ENSMUSG00000030352	590.114	936.022	955.288	1521.29	2106.17	1648.83	NA	tetraspanin 9	6	127911414	128093612
ENSMUSG00000056771	22.5763	37.0966	25.9594	35.2792	157.526	195.263	NA	NA	6	128137864	128150641
ENSMUSG00000030353	7.92782	7.88219	8.08025	5.54605	19.7184	17.1881	NA	TEA domain family member 4	6	128174306	128250841
ENSMUSG00000001521	167.242	159.687	175.555	143.281	109.866	143.289	NA	tubby-like protein 3	6	128271158	128305869
ENSMUSG00000048668	238.506	193.717	146.647	144.044	47.0893	51.7582	NA	NA	6	128307018	128312929
ENSMUSG00000001517	240.713	87.2514	82.8574	170.926	8.31665	6.99192	NA	forkhead box M1	6	128312985	128325911
ENSMUSG00000079304	3.42078	3.23047	3.76709	4.15954	12.6025	17.1881	NA	RIKEN cDNA 4933413G19 gene	6	128325474	128335162
ENSMUSG00000001520	38.5118	63.8008	57.919	70.9471	163.32	181.779	NA	nuclear receptor interacting protein 2	6	128349314	128358950
ENSMUSG00000001518	146.32	190.826	179.973	150.575	161.838	182.254	NA	integrin alpha FG-GAP repeat containing 2	6	128359462	128374949
ENSMUSG00000030357	3035.58	2595.06	2276.35	2271.45	2246.74	2140.19	NA	FK506 binding protein 4	6	128379753	128388695
ENSMUSG00000030359	43.2197	110.879	43.5102	5.28934	7.43824	14.48	NA	pregnancy zone protein	6	128433585	128476738
ENSMUSG00000047228	2.29347	2.37964	6.3774	6.6813	9.13485	11.8109	NA	cDNA sequence BC048546	6	128489840	128531624
ENSMUSG00000030361	0.442714	0	0	0	0.409102	0.430329	NA	killer cell lectin-like receptor subfamily B member 1A	6	128559245	128572952
ENSMUSG00000037827	14.8082	19.1351	19.4936	27.7248	25.5468	26.1805	NA	target of myb1 homolog (chicken)	6	128594931	128596409
ENSMUSG00000030363	0	0	0	0	0	0	NA	NA	6	128602456	128607050
ENSMUSG00000030364	1.20721	0.710625	0.449781	0.37781	0.724341	1.57014	NA	C-type lectin domain family 2, member h	6	128612404	128627389
ENSMUSG00000079299	1.9717	1.06594	3.32522	4.15954	0.409102	0.666825	NA	RIKEN cDNA 4930431A04 gene	6	128656526	128673064
ENSMUSG00000030325	0.442714	1.20615	0.899562	1.13343	0.409102	0.215165	NA	killer cell lectin-like receptor subfamily B member 1C	6	128728503	128739233
ENSMUSG00000079298	0	0.355313	0	0	0.409102	1.54881	NA	killer cell lectin-like receptor subfamily B member 1B	6	128763724	128776349
ENSMUSG00000090164	2.21357	3.83354	5.56622	6.04859	9.60416	18.4365	NA	cDNA sequence BC035044	6	128798062	128841144
ENSMUSG00000030365	0	0.958386	0.538156	1.38651	1.85778	0.90332	NA	C-type lectin domain family 2, member i	6	128837606	128848185
ENSMUSG00000000248	0	0	0	0	0	0.430329	NA	C-type lectin domain family 2, member g	6	128884399	128970537
ENSMUSG00000030154	0	3.47823	1.97587	1.88905	0	0	NA	killer cell lectin-like receptor subfamily B member 1F	6	128995919	129007489
ENSMUSG00000030155	0	0	0	0.37781	0.31524	0	NA	C-type lectin domain family 2, member e	6	129041850	129050934
ENSMUSG00000079295	0	0	0	0	0	0	NA	NA	6	129066536	129079464
ENSMUSG00000030157	45.552	53.7445	33.8629	53.6907	133.856	133.719	NA	C-type lectin domain family 2, member d	6	129130633	129136552
ENSMUSG00000030156	0	0	0	0	0.724341	0.860659	NA	CD69 antigen	6	129217342	129225387
ENSMUSG00000047720	0.442714	0	0.538156	0	0	0	NA	RIKEN cDNA 4922502D21 gene	6	129272183	129281814
ENSMUSG00000053063	2.53535	2.8425	3.95175	2.26686	11.0192	10.326	NA	C-type lectin domain family 12, member a	6	129292709	129315321
ENSMUSG00000030158	0	2.02432	0.538156	2.39522	0.818203	0.430329	NA	C-type lectin domain family 12, member B	6	129325533	129335521
ENSMUSG00000033082	23.7424	40.6497	35.6462	74.8608	32.5688	30.3966	NA	C-type lectin domain family 1, member a	6	129339308	129402018
ENSMUSG00000030159	8.04876	2.6274	2.33728	3.40392	3.21261	1.33365	NA	C-type lectin domain family 1, member b	6	129347315	129359353
ENSMUSG00000046080	0.442714	1.06594	0	0.37781	0.31524	0	NA	C-type lectin domain family 9, member a	6	129358880	129374780
ENSMUSG00000079293	5.27154	5.36234	3.14847	10.9656	12.7229	8.71324	NA	C-type lectin domain family 7, member a	6	129411611	129422790
ENSMUSG00000030162	0.442714	0	0.538156	0	0.409102	0.666825	NA	oxidized low density lipoprotein (lectin-like) receptor 1	6	129435264	129457183
ENSMUSG00000030160	0.442714	0	0	0.504351	0	0	NA	RIKEN cDNA D630042F21 gene	6	129462575	129469245
ENSMUSG00000030161	1282.43	1740.45	1779.96	2449.41	7725.93	7522.78	NA	gamma-aminobutyric acid (GABA) A receptor-associated protein-like 1	6	129483218	129492349
ENSMUSG00000050241	0.442714	0.710625	0.449781	0	0	0.430329	NA	killer cell lectin-like receptor family E member 1	6	129527911	129535842
ENSMUSG00000030165	0	0.355313	0	0	0	1.09715	NA	killer cell lectin-like receptor, subfamily D, member 1	6	129541800	129548793
ENSMUSG00000030149	0	0	0	0	0.31524	1.33365	NA	killer cell lectin-like receptor subfamily K, member 1	6	129560341	129573882
ENSMUSG00000033027	0	0	0	0	0	0	NA	killer cell lectin-like receptor subfamily C, member 3	6	129588711	129593355
ENSMUSG00000052736	0	0	0.538156	0	0	0.215165	NA	killer cell lectin-like receptor subfamily C, member 2	6	129597514	129610707
ENSMUSG00000030167	0	0	0	0	0	0.45166	NA	killer cell lectin-like receptor subfamily C, member 1	6	129616033	129628991
ENSMUSG00000067610	0	0.710625	2.06425	1.76432	0	0.215165	NA	killer cell lectin-like receptor family I member 1	6	129647236	129667150
ENSMUSG00000043932	0	0.710625	2.6024	1.25997	0.409102	0.881989	NA	killer cell lectin-like receptor family I member 2	6	129679059	129690502
ENSMUSG00000071158	0	0	0	0	0	0	NA	predicted gene 156	6	129716586	129734288
ENSMUSG00000014543	0	0	0	0	0	0.215165	NA	killer cell lectin-like receptor, subfamily A, member 17	6	129781172	129826690
ENSMUSG00000092047	0	0	0	0	0	0	NA	NA	6	129812667	129814411
ENSMUSG00000030173	0	0	0	0	0	0	NA	killer cell lectin-like receptor, subfamily A, member 5	6	129849014	129867668
ENSMUSG00000061769	0	0	0	0	0	0	NA	killer cell lectin-like receptor, subfamily A, member 6	6	129963051	129976972
ENSMUSG00000079852	0	0	0	0	0.409102	0	NA	killer cell lectin-like receptor, subfamily A, member 4	6	129993749	130017289
ENSMUSG00000089727	0	0	0	0	0	0	NA	killer cell lectin-like receptor, subfamily A, member 8	6	130065244	130079916
ENSMUSG00000079282	0	0	0	0	0	0	NA	NA	6	130090299	130093709
ENSMUSG00000033024	0	0	0	0	0	0.215165	NA	killer cell lectin-like receptor subfamily A, member 9	6	130128771	130285823
ENSMUSG00000079281	0	0	0	0	0	0	NA	NA	6	130131767	130134749
ENSMUSG00000067599	0	0	0	0	0	0	NA	killer cell lectin-like receptor, subfamily A, member 7	6	130168623	130183340
ENSMUSG00000072718	0	0	0	0	0	0.215165	NA	killer cell lectin-like receptor subfamily A, member 10	6	130219212	130231946
ENSMUSG00000067591	0	0	0	0	0	0	NA	killer cell lectin-like receptor, subfamily A, member 3	6	130273307	130287592
ENSMUSG00000079853	0	0	0	0	0	0	NA	killer cell lectin-like receptor, subfamily A, member 1	6	130313936	130336892
ENSMUSG00000061969	0	0	0	0	0	0	NA	NA	6	131116383	131132397
ENSMUSG00000030187	0.885429	3.83354	1.97587	2.64648	2.67599	6.15259	NA	killer cell lectin-like receptor, subfamily A, member 2	6	131169241	131197380
ENSMUSG00000030188	108.53	111.309	86.8817	75.3524	66.6802	54.3189	NA	mago-nashi homolog B (Drosophila)	6	131234406	131243262
ENSMUSG00000032899	35.8966	89.6446	83.8216	84.9297	9.85919	12.3905	NA	serine/threonine/tyrosine kinase 1	6	131249162	131303615
ENSMUSG00000030189	750.377	795.348	772.764	870.31	266.915	258.016	NA	cold shock domain protein A	6	131314876	131338468
ENSMUSG00000059364	0	0	0	0	0	0	NA	NA	6	131436418	131503775
ENSMUSG00000089777	0	0	0	0	0	0	NA	NA	6	131436418	131441505
ENSMUSG00000054497	0	0	0	0	0	0	NA	taste receptor, type 2, member 130	6	131579841	131580930
ENSMUSG00000053389	0	0	0	0	0	0	NA	taste receptor, type 2, member 107	6	131609136	131610167
ENSMUSG00000057754	0	0	0	0	0	0	NA	taste receptor, type 2, member 106	6	131627978	131628904
ENSMUSG00000061977	0	0	0	0	0	0	NA	taste receptor, type 2, member 104	6	131634854	131635762
ENSMUSG00000051153	0	0	0	0	0	0	NA	taste receptor, type 2, member 105	6	131636557	131637513
ENSMUSG00000063478	0	0	0	0	0	0	NA	taste receptor, type 2, member 114	6	131639152	131640081
ENSMUSG00000079276	0	0	0	0	0	0	NA	uncharacterized LOC100502592	6	132064594	132067680
ENSMUSG00000067543	0	0	0	0	0	0	NA	proline-rich protein BstNI subfamily 1	6	132156820	132160534
ENSMUSG00000052262	0	0	0	0	0	0	NA	proline-rich protein MP5	6	132261608	132264775
ENSMUSG00000030143	0	0	0	0	0	0	NA	predicted gene 8882	6	132311059	132314152
ENSMUSG00000059934	0	0	0	0	0	0	NA	proline rich protein HaeIII subfamily 1	6	132519827	132522959
ENSMUSG00000058295	0	0	0	0	0	0	NA	proline rich protein 2	6	132545931	132551254
ENSMUSG00000067541	0	0	0	0	0	0	NA	RIKEN cDNA A630073D07 gene	6	132575129	132577529
ENSMUSG00000059382	0	0	0	0	0	0	NA	taste receptor, type 2, member 120	6	132606975	132607862
ENSMUSG00000071150	0	0	0	0	0	0	NA	taste receptor, type 2, member 121	6	132650108	132651025
ENSMUSG00000078280	0	0	0	0	0	0	NA	taste receptor, type 2, member 122	6	132661017	132661946
ENSMUSG00000071149	0	0	0	0	0	0	NA	taste receptor, type 2, member 115	6	132687028	132688053
ENSMUSG00000060412	0	0	0	0	0	0	NA	taste receptor, type 2, member 124	6	132704748	132705677
ENSMUSG00000056901	0	0	0	0	0	0	NA	taste receptor, type 2, member 102	6	132712149	132713192
ENSMUSG00000053217	0	0	0	0	0	0	NA	taste receptor, type 2, member 136	6	132727197	132728180
ENSMUSG00000058349	0	0	0	0	0	0	NA	taste receptor, type 2, member 117	6	132752836	132753993
ENSMUSG00000057381	0	0	0	0	0	0	NA	taste receptor, type 2, member 123	6	132797160	132798161
ENSMUSG00000030194	0	0	0	0	0	0	NA	taste receptor, type 2, member 116	6	132805456	132806373
ENSMUSG00000062952	0	0	0	0	0	0	NA	taste receptor, type 2, member 110	6	132818026	132819027
ENSMUSG00000056926	0	0	0	0	0	0	NA	taste receptor, type 2, member 113	6	132843029	132843958
ENSMUSG00000059410	0	0	0	0	0	0	NA	taste receptor, type 2, member 125	6	132859669	132860605
ENSMUSG00000063762	0	0	0	0	0	0	NA	taste receptor, type 2, member 129	6	132901120	132910756
ENSMUSG00000057699	0	0	0	0	0	0	NA	taste receptor, type 2, member 131	6	132906930	132908551
ENSMUSG00000062528	0	0	0	0	0	0	NA	taste receptor, type 2, member 109	6	132930033	132930983
ENSMUSG00000030196	0.442714	0	0	0	0	0	NA	taste receptor, type 2, member 103	6	132986181	132987119
ENSMUSG00000071147	0	0	0	0	0	0	NA	taste receptor, type 2, member 140	6	133004835	133005834
ENSMUSG00000072704	1041.24	1151.99	1022.17	1256.63	2738	2556.02	NA	RIKEN cDNA 2700089E24 gene	6	133055257	133057765
ENSMUSG00000055594	0	0	0	0	0	0	NA	RIKEN cDNA 5530400C23 gene	6	133242234	133245808
ENSMUSG00000032758	0	0	0	0	0	0	NA	kidney androgen regulated protein	6	133799873	133803685
ENSMUSG00000030199	237.383	198.518	207.057	287.434	245.371	230.585	NA	ets variant gene 6 (TEL oncogene)	6	133985718	134220176
ENSMUSG00000030200	0	0	0	0	0	0.215165	NA	BCL2-like 14 (apoptosis facilitator)	6	134346336	134388754
ENSMUSG00000030201	1749.96	1451.34	1428.74	1258.45	1357.63	1368.35	NA	low density lipoprotein receptor-related protein 6	6	134396494	134516983
ENSMUSG00000032718	12.6357	15.6242	16.7949	14.1164	96.4455	110.85	NA	MANSC domain containing 1	6	134559228	134582506
ENSMUSG00000042992	170.905	178.709	202.044	194.168	341.429	318.852	NA	loss of heterozygosity, 12, chromosomal region 1 homolog (human)	6	134589645	134661202
ENSMUSG00000030203	220.847	123.693	128.793	133.091	235.701	291.452	NA	dual specificity phosphatase 16	6	134665488	134742643
ENSMUSG00000032652	89.1367	113.151	113.452	152.346	742.831	747.89	NA	cAMP responsive element binding protein-like 2	6	134780172	134808949
ENSMUSG00000032641	150.983	132.155	154.937	125.749	121.114	119.243	NA	G protein-coupled receptor 19	6	134819111	134847943
ENSMUSG00000003031	1591.73	1392.29	1170.42	972.957	1381.65	1028.69	NA	cyclin-dependent kinase inhibitor 1B	6	134870419	134875531
ENSMUSG00000090698	77.989	109.458	75.0674	77.2397	93.2116	118.276	NA	apolipoprotein L domain containing 1	6	134932019	134936854
ENSMUSG00000030204	492.43	493.267	513.975	456.903	430.866	490.558	NA	DEAD (Asp-Glu-Ala-Asp) box polypeptide 47	6	134961630	134973794
ENSMUSG00000046733	0.442714	0	0	0.504351	0.31524	0	NA	G protein-coupled receptor, family C, group 5, member A	6	135015669	135034727
ENSMUSG00000030205	0	0	0	0	0.31524	0	NA	G protein-coupled receptor, family C, group 5, member D	6	135056009	135068301
ENSMUSG00000042770	26.8004	56.0166	50.7383	86.3126	209.76	242.27	NA	heme binding protein 1	6	135087537	135118233
ENSMUSG00000030207	1079.53	1353.97	1548.55	1393.56	2528	2593.13	NA	RIKEN cDNA 8430419L09 gene	6	135147995	135194973
ENSMUSG00000030206	0	0.603073	1.61447	0.75562	1.76392	0.430329	NA	germ cell-specific gene 1	6	135187347	135204354
ENSMUSG00000047104	0	0	0	0	2.17302	0.430329	NA	phosphatidylethanolamine binding protein 2	6	135259802	135260365
ENSMUSG00000030208	150.262	114.03	94.4001	114.45	43.3666	35.0004	NA	epithelial membrane protein 1	6	135312949	135333191
ENSMUSG00000030209	1330.11	2519.93	2536.61	2596.4	3191.4	4032.78	NA	glutamate receptor, ionotropic, NMDA2B (epsilon 2)	6	135679844	136123529
ENSMUSG00000060782	0.442714	0	0.538156	0	0	0	NA	NA	6	136278539	136280001
ENSMUSG00000045291	0	0	0	0	0	0	NA	RIKEN cDNA E330021D16 gene	6	136350737	136351852
ENSMUSG00000091408	1.64992	1.56146	1.97587	2.51994	1.5762	1.31232	NA	NA	6	136434643	136438660
ENSMUSG00000030213	1271.78	1108.96	1279.44	880.088	582.73	631.716	NA	activating transcription factor 7 interacting protein	6	136467372	136555898
ENSMUSG00000053935	637.463	594.347	643.684	467.726	362.911	378.269	NA	NA	6	136556350	136559373
ENSMUSG00000030214	5.51341	2.02432	4.40153	1.89086	4.06446	4.17345	NA	phospholipase B domain containing 1	6	136560591	136610449
ENSMUSG00000042638	4.62798	9.27078	13.2851	21.5497	11.1202	14.7787	NA	guanylate cyclase 2c	6	136645806	136730286
ENSMUSG00000068851	847.992	622.607	541.465	473.811	307.443	249.399	NA	NA	6	136752589	136752900
ENSMUSG00000060032	284.916	261.733	228.43	245.819	322.569	345.631	NA	H2A histone family, member J	6	136756769	136758595
ENSMUSG00000030216	397.253	325.499	422.561	386.797	320.86	339.475	NA	WW domain binding protein 11	6	136762175	136776754
ENSMUSG00000047515	3.62162	7.06401	11.3092	6.55294	6.83431	9.68055	NA	cDNA sequence BC049715	6	136777364	136789057
ENSMUSG00000043298	12.4349	24.0345	21.8309	28.8528	190.79	179.78	NA	RIKEN cDNA C030030A07 gene	6	136778448	136783973
ENSMUSG00000030217	3.50068	1.66901	0.987937	3.02429	5.76108	3.4853	NA	ADP-ribosyltransferase 4	6	136796972	136806254
ENSMUSG00000030218	7.16333	30.6779	10.2408	60.5131	162.809	139.056	NA	matrix Gla protein	6	136820957	136824326
ENSMUSG00000030219	0.764492	1.06594	1.61447	1.51305	3.40033	1.95781	NA	endoplasmic reticulum protein 27	6	136855832	136870701
ENSMUSG00000030220	41.3689	54.1843	46.6177	63.4993	39.6918	50.1009	NA	Rho, GDP dissociation inhibitor (GDI) beta	6	136872044	136890420
ENSMUSG00000064330	2.21357	3.44557	5.47784	4.40899	9.85919	12.7995	NA	phosphodiesterase 6H, cGMP-specific, cone, gamma	6	136903044	136917386
ENSMUSG00000030222	25.4334	33.6606	39.4449	43.8514	52.1526	60.1051	NA	RAS-like, estrogen-regulated, growth-inhibitor	6	137003346	137119018
ENSMUSG00000030223	1430.82	1806.98	1770.68	1649.93	763.063	658.522	NA	protein tyrosine phosphatase, receptor type, O	6	137200820	137413150
ENSMUSG00000079274	0.442714	0	0	0	0	0	NA	NA	6	137393411	137398974
ENSMUSG00000015766	204.109	437.573	496.015	916.293	1219.06	960.77	NA	epidermal growth factor receptor pathway substrate 8	6	137425766	137603397
ENSMUSG00000030224	1430.87	1537.69	1595.15	1666.69	1957.21	1853.87	NA	serine/threonine kinase receptor associated protein	6	137683599	137700453
ENSMUSG00000030225	60.4035	42.2861	48.4815	91.6092	53.7961	45.6909	NA	2-deoxyribose-5-phosphate aldolase homolog (C. elegans)	6	137703063	137786410
ENSMUSG00000044378	0	0	0.987937	0.75562	0.724341	0.215165	NA	solute carrier family 15, member 5	6	137932107	138028437
ENSMUSG00000008540	93.0801	120.541	122.85	151.486	129.216	135.121	NA	microsomal glutathione S-transferase 1	6	138088837	138105276
ENSMUSG00000030226	1318.46	1649.31	1744.97	1506.74	1195.3	1245.9	NA	LIM domain only 3	6	138311439	138530489
ENSMUSG00000046717	1.64992	6.10563	7.27696	10.2027	4.97653	4.40995	NA	immunoglobulin (CD79A) binding protein 1b	6	138605616	138606965
ENSMUSG00000092164	0	0	0	0	2.17302	0.215165	NA	RERG/RAS-like	6	139441703	139450430
ENSMUSG00000030228	2.41441	6.56849	4.93968	7.18383	4.34605	4.19478	NA	phosphatidylinositol 3-kinase, C2 domain containing, gamma polypeptide	6	139570409	139916464
ENSMUSG00000030230	3.74255	7.03136	10.4175	9.32233	11.6231	13.1872	NA	phospholipase C, zeta 1	6	139938197	139989978
ENSMUSG00000041791	0	0.603073	0	0	0	0	NA	capping protein (actin filament) muscle Z-line, alpha 3	6	139990046	139991310
ENSMUSG00000030231	711.342	683.096	771.48	597.952	753.919	1057.54	NA	pleckstrin homology domain containing, family A member 5	6	140372620	140544804
ENSMUSG00000030232	823.865	734.595	822.459	852.128	1202.6	1182.28	NA	AE binding protein 2	6	140570970	140626993
ENSMUSG00000079264	0	0	0	0	0	0	NA	NA	6	140677805	140704574
ENSMUSG00000041741	141.69	131.781	143.21	265.688	112.354	96.0107	NA	phosphodiesterase 3A, cGMP inhibited	6	141197790	141447872
ENSMUSG00000030235	190.384	420.312	496.825	596.753	909.332	844.476	NA	solute carrier organic anion transporter family, member 1c1	6	141472907	141518241
ENSMUSG00000030236	3.099	6.84891	6.7309	2.3934	3.74922	3.72179	NA	solute carrier organic anion transporter family, member 1b2	6	141578039	141635167
ENSMUSG00000084927	0	0	0	0	0	0.430329	NA	predicted gene 5724	6	141656639	141722331
ENSMUSG00000030237	56.9028	46.5403	64.4731	163.2	1284.14	1151.47	NA	solute carrier organic anion transporter family, member 1a4	6	141753961	141804720
ENSMUSG00000041698	2.21357	1.20615	3.22894	0.504351	0	1.50615	NA	solute carrier organic anion transporter family, member 1a1	6	141855803	141895483
ENSMUSG00000079263	0	0.355313	0.449781	0.882161	0.409102	0	NA	predicted gene 6614	6	141920717	141957266
ENSMUSG00000079262	11.7503	10.7573	10.9636	5.54424	6.23749	10.2834	NA	solute carrier organic anion transporter family, member 1a6	6	142034282	142157042
ENSMUSG00000063975	4.94976	8.0224	2.96381	7.93945	7.05569	7.29241	NA	solute carrier organic anion transporter family, member 1a5	6	142182748	142271501
ENSMUSG00000041681	0.885429	1.56146	0.538156	0	0	0.215165	NA	islet amyloid polypeptide	6	142246943	142252481
ENSMUSG00000041671	372.679	368.106	359.576	280.24	246.706	242.894	NA	pyridine nucleotide-disulphide oxidoreductase domain 1	6	142294174	142311777
ENSMUSG00000030243	399.237	319.092	314.557	331.143	310.785	340.194	NA	RecQ protein-like	6	142298862	142335607
ENSMUSG00000030245	678.236	634.388	562.513	594.866	795.759	699.77	NA	golgi transport 1 homolog B (S. cerevisiae)	6	142335741	142352378
ENSMUSG00000071112	12.6357	18.532	7.55	19.1581	10.5835	8.3469	NA	RIKEN cDNA B230216G23 gene	6	142361961	142368250
ENSMUSG00000030244	3.62162	3.12292	2.06425	1.51305	1.26096	1.31232	NA	glycogen synthase 2	6	142371133	142421629
ENSMUSG00000030246	938.399	987.769	1037.24	1428.91	3233.4	3616.31	NA	lactate dehydrogenase B	6	142438769	142456477
ENSMUSG00000030247	119.075	112.529	71.2924	86.5656	72.4076	75.1861	NA	potassium inwardly-rectifying channel, subfamily J, member 8	6	142513459	142519876
ENSMUSG00000030249	361.132	396.213	274.55	294.738	192.884	153.553	NA	ATP-binding cassette, sub-family C (CFTR/MRP), member 9	6	142536382	142650794
ENSMUSG00000041614	0.442714	0	0	0	0	0	NA	NA	6	142573931	142574242
ENSMUSG00000030282	1092.28	1199.38	1227.64	1247.44	1316.17	1101.36	NA	cytidine monophospho-N-acetylneuraminic acid synthetase	6	142705206	142724234
ENSMUSG00000048473	0.885429	2.37964	2.06425	2.14213	0.945719	3.29146	NA	predicted gene 766	6	142733724	142753022
ENSMUSG00000030283	980.895	831.598	958.498	711.461	804.272	835.719	NA	ST8 alpha-N-acetyl-neuraminide alpha-2,8-sialyltransferase 1	6	142770065	142912972
ENSMUSG00000030279	718.512	678.126	699.843	676.798	528.619	670.219	NA	RIKEN cDNA 5730419I09 gene	6	142959440	143048627
ENSMUSG00000030275	2440.62	3241.82	3195.99	4038.62	5781.3	5755.5	NA	ethanolamine kinase 1	6	143115750	143157062
ENSMUSG00000041540	1632.63	1031.43	1027.13	735.103	468.061	482.222	NA	SRY-box containing gene 5	6	143776945	144730497
ENSMUSG00000030268	1306.46	1301.96	1110.96	1208.59	1819.35	1560.38	NA	branched chain aminotransferase 1, cytosolic	6	144942355	145024704
ENSMUSG00000030263	8.37054	6.46094	4.76293	11.215	27.4577	19.3611	NA	lymphoid-restricted membrane protein	6	145064173	145123454
ENSMUSG00000043541	17.5444	12.6741	18.8592	21.2984	8.50437	14.3057	NA	cancer susceptibility candidate 1	6	145123354	145159490
ENSMUSG00000040370	132.274	128.443	131.95	147.701	293.454	274.989	NA	LYR motif containing 5	6	145159654	145165459
ENSMUSG00000030265	1134.69	1177.48	1200.88	1255.29	1054.91	1037.52	NA	v-Ki-ras2 Kirsten rat sarcoma viral oncogene homolog	6	145165219	145198759
ENSMUSG00000054966	14.6074	11.3604	7.26906	12.8546	9.32258	10.326	NA	intermediate filament tail domain containing 1	6	145313654	145562839
ENSMUSG00000067338	0	0	0.538156	0	0	0	NA	tubulin, alpha 3A	6	145564277	145569999
ENSMUSG00000030259	189.22	140.449	164.471	241.376	490.91	445.654	NA	Ras association (RalGDS/AF-6) domain family (N-terminal) member 8	6	145695268	145769599
ENSMUSG00000045110	0	0	0	0	0	0	NA	NA	6	145768464	145769594
ENSMUSG00000030256	37.7862	65.7502	80.2959	118.591	207.163	235.628	NA	basic helix-loop-helix family, member e41	6	145806763	145814078
ENSMUSG00000030255	77.3864	120.322	123.307	165.461	247.11	241.841	NA	sarcospan	6	145880161	145913743
ENSMUSG00000030287	224.147	319.724	372.957	882.471	868.097	704.083	NA	inositol 1,4,5-triphosphate receptor 2	6	146056821	146450745
ENSMUSG00000090911	0	0	0	0	0	0	NA	NA	6	146140509	146140622
ENSMUSG00000040250	528.324	390.589	359.559	345.419	331.996	335.261	NA	RIKEN cDNA 4933424B01 gene	6	146498154	146526357
ENSMUSG00000040242	450.145	355.872	327.351	420.391	1103.36	1239.13	NA	FGFR1 oncogene partner 2	6	146525725	146547720
ENSMUSG00000040234	297.586	382.786	405.046	451.357	653.602	607.822	NA	transmembrane 7 superfamily member 3	6	146550874	146591346
ENSMUSG00000030291	179.88	180.173	156.102	173.135	233.346	230.873	NA	mediator complex subunit 21	6	146591069	146599124
ENSMUSG00000001630	262.214	254.235	268.381	301.569	571.3	606.696	NA	serine/threonine kinase 38 like	6	146673517	146727334
ENSMUSG00000040187	23.5416	40.5422	40.7864	47.6294	40.8181	53.6288	NA	aryl hydrocarbon receptor nuclear translocator-like 2	6	146744577	146782051
ENSMUSG00000030292	0	0.603073	0	0	1.03958	0.881989	NA	RIKEN cDNA 1700023A16 gene	6	146798626	146819928
ENSMUSG00000016487	355.981	470.037	431.776	716.338	633.135	574.365	NA	PTPRF interacting protein, binding protein 1 (liprin beta 1)	6	146837009	146980547
ENSMUSG00000040163	0	0.603073	0	0	0.31524	1.35498	NA	RIKEN cDNA 1700034J05 gene	6	146898851	146902944
ENSMUSG00000040121	5.0707	10.0794	6.28112	7.68637	9.04099	7.91657	NA	RAB15 effector protein	6	146981059	146982040
ENSMUSG00000040112	218.392	214.567	232.984	226.954	203.648	241.494	NA	mitochondrial ribosomal protein S35	6	146991286	147019425
ENSMUSG00000072662	4.18527	2.98271	3.23684	4.41262	3.84308	5.70093	NA	predicted gene 5887	6	147023582	147035554
ENSMUSG00000040102	570.713	633.379	688.423	902.953	938.918	848.107	NA	kelch domain containing 5	6	147039663	147061300
ENSMUSG00000048776	7.88679	4.26375	6.11228	11.7248	9.63782	9.68055	NA	parathyroid hormone-like peptide	6	147200623	147212689
ENSMUSG00000030301	514.568	532.597	449.415	527.769	747.17	748.801	NA	coiled-coil domain containing 91	6	147424393	147581134
ENSMUSG00000030303	188.892	350.108	399.744	535.528	323.763	289.851	NA	fatty acyl CoA reductase 2	6	147995781	148131280
ENSMUSG00000030304	1024.71	1065.5	995.983	903.123	868.301	872.933	NA	ERGIC and golgi 2	6	148127601	148160896
ENSMUSG00000030306	402.818	714.66	687.232	900.072	1550.23	1596.33	NA	transmembrane and tetratricopeptide repeat containing 1	6	148180952	148392911
ENSMUSG00000063171	285.315	314.988	295.161	263.247	117.99	127.183	NA	NA	6	148303178	148304120
ENSMUSG00000040029	959.565	945.252	810.724	984.229	1433.54	1478.73	NA	importin 8	6	148719205	148779989
ENSMUSG00000030309	151.104	166.452	132.969	112.157	64.0113	69.2255	NA	caprin family member 2	6	148791014	148844759
ENSMUSG00000039985	1083.47	470.064	342.54	244.252	87.578	92.607	NA	family with sequence similarity 60, member A	6	148869557	148894989
ENSMUSG00000030313	1494.25	1492.95	1527.22	1634.47	2207.99	2193.57	NA	DENN/MADD domain containing 5B	6	148936593	149050202
ENSMUSG00000067292	12.9964	2.48719	11.2445	8.06962	0	0	NA	NA	6	149078692	149079232
ENSMUSG00000039958	28.6512	29.0838	23.2607	25.9587	20.6305	22.5441	NA	RIKEN cDNA 4833442J19 gene	6	149088371	149099693
ENSMUSG00000068250	284.704	317.638	274.325	232.992	183.528	189.157	NA	antagonist of mitotic exit network 1	6	149105669	149137234
ENSMUSG00000032712	848.322	636.11	632.847	494.992	411.098	378.565	NA	RIKEN cDNA 2810474O19 gene	6	149257936	149284180
ENSMUSG00000003452	1627.31	1839.68	1917.98	2021.7	2115.46	1695.59	NA	bicaudal D homolog 1 (Drosophila)	6	149357506	149511851
ENSMUSG00000055452	11.7503	5.4699	5.57412	5.54605	2.8035	1.74265	NA	NA	7	3108535	3111950
ENSMUSG00000054753	3.62162	0.603073	2.15262	0.37781	0.409102	1.33365	NA	expressed sequence AU018091	7	3154665	3169204
ENSMUSG00000078817	0.442714	1.56146	1.43772	3.65519	2.8035	1.33365	NA	NLR family, pyrin domain containing 12	7	3221511	3249741
ENSMUSG00000068566	135.814	161.343	148.069	206.816	196.231	201.454	NA	myeloid-associated differentiation marker	7	3289039	3299346
ENSMUSG00000078816	30.0203	90.6874	135.483	327.055	1239.62	1452.95	NA	protein kinase C, gamma	7	3303640	3330714
ENSMUSG00000069806	275.524	326.364	317.302	351.245	308.364	335.035	NA	calcium channel, voltage-dependent, gamma subunit 7	7	3333055	3367810
ENSMUSG00000053395	88.2081	120.743	119.572	151.692	280.952	263.13	NA	calcium channel, voltage-dependent, gamma subunit 8	7	3394567	3415366
ENSMUSG00000078815	0	0.710625	0.987937	1.25997	3.62171	3.35545	NA	calcium channel, voltage-dependent, gamma subunit 6	7	3425423	3435658
ENSMUSG00000053338	0.442714	0	0.538156	0.37781	0	0	NA	T cell-interacting, activating receptor on myeloid cells 1	7	3489960	3503346
ENSMUSG00000078814	0	0	0	0	0	0	NA	NA	7	3510165	3511621
ENSMUSG00000054594	3.42078	4.40396	8.35328	6.55294	3.62171	6.41042	NA	osteoclast associated receptor	7	3561415	3567759
ENSMUSG00000035674	255.491	276.021	268.903	328.771	414.729	447.628	NA	NADH dehydrogenase (ubiquinone) 1 alpha subcomplex, 3	7	3568975	3571765
ENSMUSG00000006335	113.039	113.431	132.319	120.583	128.162	118.252	NA	TCF3 (E2A) fusion partner	7	3571926	3581531
ENSMUSG00000008373	665.356	552.243	571.975	500.664	526.35	494.84	NA	PRP31 pre-mRNA processing factor 31 homolog (yeast)	7	3581587	3594088
ENSMUSG00000035632	309.451	274.415	274.379	207.46	112.321	125.326	NA	CCR4-NOT transcription complex, subunit 3	7	3596892	3612710
ENSMUSG00000078813	97.3842	109.682	86.6891	96.0327	93.8031	83.4013	NA	leukocyte receptor cluster (LRC) member 1	7	3611700	3617442
ENSMUSG00000019734	51.0244	52.6228	65.7578	39.4351	16.2242	23.1256	NA	transmembrane channel-like gene family 4	7	3617392	3629126
ENSMUSG00000035596	448.409	720.07	891.801	1024.58	906.688	981.864	NA	membrane bound O-acyltransferase domain containing 7	7	3629392	3645125
ENSMUSG00000035585	648.548	803.811	734.039	793.581	519.176	508.27	NA	tRNA splicing endonuclease 34 homolog (S. cerevisiae)	7	3644977	3652625
ENSMUSG00000006333	4749.43	4044.75	3475.86	3203.65	2132.3	2418.36	NA	ribosomal protein S9	7	3655595	3658503
ENSMUSG00000058818	6.15697	5.61011	3.41359	4.53735	4.53377	3.95829	NA	leukocyte immunoglobulin-like receptor, subfamily B (with TM and ITIM domains), member 3	7	3663011	3671993
ENSMUSG00000074417	0	0	0	0	0	0.215165	NA	paired-Ig-like receptor A1	7	3687072	3849722
ENSMUSG00000074419	0	0	0	0	0	0	NA	paired-Ig-like receptor A6	7	3768383	3777299
ENSMUSG00000089942	0	0	1.07631	0	0.630479	0.215165	NA	paired-Ig-like receptor A2	7	3788412	3796653
ENSMUSG00000030427	0	0	0	0	0.409102	0	NA	leukocyte immunoglobulin-like receptor, subfamily A (with TM domain), member 6	7	3859882	3867105
ENSMUSG00000055541	30.6639	31.0006	43.4692	52.1795	135.452	129.546	NA	leukocyte-associated Ig-like receptor 1	7	3958675	4014806
ENSMUSG00000030428	1199.31	1791.84	2445.75	3719.14	5424.04	5012.82	NA	tweety homolog 1 (Drosophila)	7	4071010	4088308
ENSMUSG00000035545	1277.22	1355.09	1712.4	1106.96	741.901	940.919	NA	leukocyte receptor cluster (LRC) member 8	7	4088641	4099775
ENSMUSG00000043432	41.0882	37.2791	36.923	40.1943	71.3149	75.0563	NA	leukocyte receptor cluster (LRC) member 9	7	4099785	4101474
ENSMUSG00000063838	12.3139	11.6082	5.29318	10.9619	5.19791	9.72321	NA	CDC42 effector protein (Rho GTPase binding) 5	7	4102862	4116462
ENSMUSG00000070873	0.442714	0.958386	0.449781	1.0087	2.8035	3.97962	NA	leukocyte immunoglobulin-like receptor, subfamily A (with TM domain), member 5	7	4189356	4195065
ENSMUSG00000062524	0	0	0	0.504351	0.409102	0.215165	NA	natural cytotoxicity triggering receptor 1	7	4289326	4296766
ENSMUSG00000078810	0	0	0	0	0.724341	0.430329	NA	glycoprotein 6 (platelet)	7	4320315	4349346
ENSMUSG00000008435	446.483	561.372	523.374	531.205	373.743	364.504	NA	retinol dehydrogenase 13 (all-trans and 9-cis)	7	4376372	4397251
ENSMUSG00000006154	72.2769	50.4487	57.0589	43.7194	49.2021	48.1023	NA	EPS8-like 1	7	4412276	4431006
ENSMUSG00000019254	572.887	723.527	750.019	649.796	1054.08	1085.47	NA	protein phosphatase 1, regulatory (inhibitor) subunit 12C	7	4433122	4453282
ENSMUSG00000064179	13.3203	8.84057	8.2649	12.099	87.3708	96.2184	NA	troponin T1, skeletal, slow	7	4456172	4467984
ENSMUSG00000035458	4.70789	2.73495	8.08815	5.0417	3.43398	3.89429	NA	troponin I, cardiac 3	7	4469907	4475831
ENSMUSG00000055809	6.80052	9.5512	19.4936	9.70559	5.01018	3.72179	NA	RIKEN cDNA 6030429G01 gene	7	4474535	4484055
ENSMUSG00000004961	357.983	587.275	623.797	511.877	623.554	791.379	NA	synaptotagmin V	7	4491370	4498169
ENSMUSG00000035429	9.45681	13.0294	18.5057	18.2705	6.83431	10.045	NA	protein tyrosine phosphatase, receptor type, H	7	4500214	4555643
ENSMUSG00000045282	46.9212	37.3444	31.2526	22.806	19.8122	20.7374	NA	transmembrane protein 86B	7	4579644	4582084
ENSMUSG00000052296	1382.06	1206.4	1318.04	1444.11	1951.01	2119.66	NA	protein phosphatase 6, regulatory subunit 1	7	4583103	4610552
ENSMUSG00000063802	254.049	367.97	404.918	461.146	416.875	467.458	NA	HSPA (heat shock 70kDa) binding protein, cytoplasmic cochaperone 1	7	4612123	4636565
ENSMUSG00000035390	933.55	1050.66	1331.18	1288.32	1048.29	1364.43	NA	BR serine/threonine kinase 1	7	4642206	4667599
ENSMUSG00000046456	11.1478	15.4321	12.2892	21.6617	42.2332	52.4018	NA	transmembrane protein 150B	7	4658434	4676851
ENSMUSG00000059851	251.263	218.85	194.614	157.647	84.2857	75.8724	NA	suppressor of variegation 4-20 homolog 2 (Drosophila)	7	4691717	4699116
ENSMUSG00000051811	6.03603	7.91485	10.2408	11.9743	4.66129	6.00142	NA	cytochrome c oxidase subunit VIb polypeptide 2	7	4703396	4704696
ENSMUSG00000049952	0	0	0	0	0	0	NA	NA	7	4704828	4722904
ENSMUSG00000004371	3.099	7.17156	10.5059	7.30674	2.58213	5.95876	NA	interleukin 11	7	4724657	4734459
ENSMUSG00000013091	0	0	0	0	0.31524	0	NA	transmembrane protein 190	7	4734542	4735943
ENSMUSG00000030431	15.4928	30.603	27.839	28.7281	27.277	23.1469	NA	transmembrane protein 238	7	4736197	4741258
ENSMUSG00000030432	907.905	768.646	809.822	722.398	275.152	350.642	NA	ribosomal protein L28	7	4744476	4746164
ENSMUSG00000060860	1044.91	950.885	894.17	964.253	508.532	533.892	NA	ubiquitin-conjugating enzyme E2S	7	4759616	4763942
ENSMUSG00000053550	365.667	508.236	542.268	330.404	152.489	240.283	NA	shisa homolog 7 (Xenopus laevis)	7	4777154	4796298
ENSMUSG00000052605	10.3422	7.52688	9.78309	8.56853	27.123	33.3876	NA	isochorismatase domain containing 2b	7	4796561	4817795
ENSMUSG00000086784	67.8065	64.642	49.1238	69.0635	118.27	145.553	NA	isochorismatase domain containing 2a	7	4828655	4847319
ENSMUSG00000074406	51.9898	54.9698	77.9177	58.9873	19.9061	29.2568	NA	zinc finger protein 628	7	4866819	4873605
ENSMUSG00000035285	101.41	145.156	133.821	123.716	283.79	338.225	NA	N-acetyltransferase 14	7	4873853	4876608
ENSMUSG00000035279	19.2764	26.1991	15.7186	29.9989	7.37093	12.3052	NA	scavenger receptor cysteine rich domain containing (5 domains)	7	4877446	4896423
ENSMUSG00000030433	0	1.20615	0	0.37781	0	0.45166	NA	SH3-binding domain kinase family, member 2	7	4908683	4915950
ENSMUSG00000085272	3.1789	6.89115	8.53793	1.38651	0.945719	1.76398	NA	predicted gene 1078	7	4916862	4922770
ENSMUSG00000051550	154.885	162.572	185	144.427	50.61	41.1957	NA	zinc finger protein 579	7	4935085	4947760
ENSMUSG00000061374	262.169	213.689	191.265	182.728	107.941	126.08	NA	Flt3 interacting zinc finger protein 1	7	4958659	4966299
ENSMUSG00000051184	19.4362	20.3085	15.3651	21.8028	16.4385	18.5858	NA	zinc finger protein 524	7	4967103	4970088
ENSMUSG00000074405	159.317	141.468	183.008	145.296	91.5894	99.4283	NA	zinc finger protein 865	7	4971978	4984740
ENSMUSG00000063757	12.9985	8.12995	16.7145	7.31037	8.85327	5.2706	NA	NA	7	4985720	4986848
ENSMUSG00000043290	69.6983	60.313	73.6376	45.115	58.491	61.1169	NA	zinc finger protein 784	7	4986041	4990048
ENSMUSG00000055633	60.0385	72.4877	68.5765	68.4308	16.6935	13.9393	NA	zinc finger protein 580	7	5003134	5005324
ENSMUSG00000035228	185.432	325.208	325.055	337.305	322.454	309.26	NA	coiled-coil domain containing 106	7	5007754	5012387
ENSMUSG00000030435	1923.71	1657.57	1477.84	1473.36	1208.07	1189.25	NA	U2 small nuclear ribonucleoprotein auxiliary factor (U2AF) 2	7	5013745	5031534
ENSMUSG00000035203	1146.56	1468.47	1603.22	1763.05	2208.29	2454.91	NA	epsin 1	7	5031837	5049780
ENSMUSG00000035191	0	0	0	0	0.409102	0	NA	ret finger protein-like 4	7	5061389	5068513
ENSMUSG00000083649	0.442714	1.56146	1.52609	2.64648	1.76392	0.666825	NA	RAS-like, family 2, locus 9	7	5076547	5077552
ENSMUSG00000074402	0	0	0	0	0	0	NA	vomeronasal 1 receptor 55	7	5097820	5099103
ENSMUSG00000091874	0	0	0	0	0	0	NA	vomeronasal 1 receptor 56	7	5146519	5148349
ENSMUSG00000091652	0	0	0	0	0	0	NA	vomeronasal 1 receptor 57	7	5172080	5173012
ENSMUSG00000035177	4.82882	2.51984	3.50197	2.01559	3.52784	4.64644	NA	NLR family, pyrin domain containing 2	7	5250156	5302637
ENSMUSG00000048398	0	0	0	0	0	0	NA	NA	7	5302144	5312284
ENSMUSG00000078808	198.951	233.736	241.425	182.089	129.376	173.595	NA	vomeronasal 1 receptor 58	7	5360489	5364747
ENSMUSG00000074401	0	0	0	0	0	0	NA	vomeronasal 1 receptor 59	7	5405002	5406440
ENSMUSG00000066820	0	0	0	0	0	0	NA	vomeronasal 2, receptor 28	7	5432243	5445453
ENSMUSG00000090794	0	0	0	0	0	0	NA	vomeronasal 1 receptor 60	7	5495799	5496731
ENSMUSG00000090776	0	0	0	0	0	0	NA	NA	7	5562013	5562915
ENSMUSG00000092579	0	0	0	0	0	0	NA	vomeronasal 1 receptor 62	7	5626229	5627985
ENSMUSG00000058631	0	0	0	0	0	0	NA	vomeronasal 1 receptor 63	7	5753947	5757047
ENSMUSG00000092423	0	0	0	0	0	0	NA	NA	7	5754331	5755233
ENSMUSG00000058399	0	0	0	0	0	0	NA	vomeronasal 1 receptor 64	7	5835182	5836144
ENSMUSG00000066850	10.4221	12.5339	13.839	6.30167	2.99123	7.07724	NA	vomeronasal 1 receptor 65	7	5959352	5962612
ENSMUSG00000064231	0	0	0.449781	0	0.31524	0	NA	ribosomal protein S18 pseudogene	7	5970624	5971070
ENSMUSG00000034690	0	0	0	0	0.31524	0	NA	NLR family, pyrin domain containing 4C	7	5996763	6056751
ENSMUSG00000046792	210.507	194.735	207.677	192.786	258.907	237.342	NA	zinc finger protein 787	7	6083091	6107573
ENSMUSG00000044876	394.45	411.902	411.689	360.742	304.266	280.988	NA	zinc finger protein 444	7	6123828	6142951
ENSMUSG00000034660	0	0	0	0	0	0	NA	galanin-like peptide	7	6148692	6167739
ENSMUSG00000090545	0	0	0	0	0	0	NA	NA	7	6169580	6170305
ENSMUSG00000058028	2.41441	2.37964	3.23684	0.504351	1.13344	1.57014	NA	zinc finger and SCAN domain containing 5B	7	6173880	6191025
ENSMUSG00000053367	0	1.66901	0.449781	0.37781	0.409102	0	NA	predicted gene 6792	7	6204312	6233668
ENSMUSG00000054893	254.286	257.938	307.914	215.464	281.864	280.794	NA	zinc finger protein 667	7	6238181	6259485
ENSMUSG00000030443	144.748	144.816	142.422	131.804	65.3855	71.1833	NA	zinc finger protein 583	7	6267262	6282887
ENSMUSG00000055150	52.2338	61.0985	39.7021	37.2948	45.104	40.7032	NA	zinc finger protein 78	7	6324068	6332201
ENSMUSG00000062861	239.638	243.941	270.662	170.355	80.2284	93.987	NA	zinc finger protein 28	7	6336080	6347755
ENSMUSG00000093536	85.7548	144.96	141.974	270.312	276.948	241.861	NA	predicted gene, 16532	7	6351425	6384804
ENSMUSG00000090824	0	0.603073	0	0	0	0	NA	olfactory receptor 1344	7	6392547	6393607
ENSMUSG00000048620	0	0	0	0	0	0	NA	olfactory receptor 1336	7	6413222	6414166
ENSMUSG00000054938	1.64992	0.355313	1.07631	0.75562	0.409102	0.90332	NA	olfactory receptor 1346	7	6426799	6427864
ENSMUSG00000066844	0	0	0	0	0	0	NA	NA	7	6432927	6433883
ENSMUSG00000034583	0	0	0	0	0	0	NA	olfactory receptor 1347	7	6440624	6441587
ENSMUSG00000066843	0	0	0	0	0	0	NA	NA	7	6453997	6455036
ENSMUSG00000048067	0.764492	0	0	0	0.818203	0	NA	olfactory receptor 1349	7	6467107	6468160
ENSMUSG00000056696	0	0	0	0	0	0	NA	olfactory receptor 1350	7	6522704	6523630
ENSMUSG00000002266	146.48	271.398	278.148	278.759	36.2242	47.3251	NA	zinc finger, imprinted 1	7	6628154	6649161
ENSMUSG00000002265	4542.03	5142.32	6401.79	7703.12	7908.24	7524.87	NA	paternally expressed 3	7	6656603	6683132
ENSMUSG00000051527	921.8	1060.88	1227.3	1254.2	844.694	741.722	NA	ubiquitin specific peptidase 29	7	6913871	6916480
ENSMUSG00000070837	1.64992	0.958386	0.449781	0.37781	2.17302	0.215165	NA	aurora kinase C	7	6948154	6955656
ENSMUSG00000062116	204.951	191.243	191.41	157.753	218.866	193.659	NA	zinc finger protein 954	7	7067401	7074163
ENSMUSG00000063535	223.867	183.908	134.937	69.8009	51.9649	44.6383	NA	zinc finger protein 773	7	7083389	7089466
ENSMUSG00000034538	85.8779	99.9909	76.1028	65.0214	87.633	71.0553	NA	zinc finger protein 418	7	7124041	7136273
ENSMUSG00000066838	108.29	118.611	117.926	131.932	140.053	135.784	NA	zinc finger protein 772	7	7154833	7162506
ENSMUSG00000074394	6.72062	8.37771	9.70262	15.4993	14.5807	13.0147	NA	NA	7	7184038	7200039
ENSMUSG00000000605	2918.23	3694.24	3726.58	3812.36	4903.39	4408.85	NA	chloride channel 4-2	7	7235027	7252222
ENSMUSG00000070847	0	0.710625	0.449781	0.882161	0.724341	0.666825	NA	vomeronasal 2, receptor 30	7	7264434	7290242
ENSMUSG00000071459	0	0	0	0	0	0	NA	NA	7	7336696	7352338
ENSMUSG00000070849	0	0	0	0	0	0	NA	NA	7	7416680	7432684
ENSMUSG00000090895	0	0	0	0	0	0.45166	NA	NA	7	7503678	7519497
ENSMUSG00000070841	0	0.603073	0	0	0	0.45166	NA	vomeronasal 2, receptor 34	7	7623598	7642224
ENSMUSG00000090518	0	0	0	0	0	0	NA	NA	7	7738862	7772578
ENSMUSG00000091651	0	0	0	0	0	0	NA	vomeronasal 2, receptor 36	7	7829362	7855173
ENSMUSG00000070848	0	0	0	0	0	0	NA	NA	7	8246140	8271740
ENSMUSG00000091600	0	0	0	0	0	0	NA	NA	7	8557272	8583082
ENSMUSG00000066828	0	0	0	0	0	0	NA	vomeronasal 2, receptor 37	7	8954257	8972360
ENSMUSG00000078806	0	0	0.449781	0	0	0.666825	NA	NA	7	9079916	9103001
ENSMUSG00000066836	0	0	0	0	0	0	NA	NA	7	9147043	9163358
ENSMUSG00000090864	0	0	0	0	0	0	NA	predicted gene 10302	7	9246337	9270668
ENSMUSG00000090662	0	0	0	0	0	0.215165	NA	vomeronasal 2, receptor 45	7	9638195	9656745
ENSMUSG00000091178	0	0	0	0	0	0	NA	NA	7	9744080	9759858
ENSMUSG00000053720	0	0	0	0	0	0	NA	vomeronasal 2, receptor 43	7	9866727	9882979
ENSMUSG00000070844	0	0.603073	0	0.37781	0.409102	0	NA	vomeronasal 2, receptor 42	7	9927007	9944065
ENSMUSG00000090892	0	0	0.449781	0	0	0	NA	vomeronasal 2, receptor 41	7	9965676	9990380
ENSMUSG00000093718	0	0	0	0	0	0	NA	NA	7	10162947	10170345
ENSMUSG00000090342	0	0	0	0	0	0	NA	vomeronasal 2, receptor 46	7	10339985	10355920
ENSMUSG00000091545	0	0	0	0	0	0	NA	NA	7	10402131	10426674
ENSMUSG00000091544	0	0	0	0	0	0	NA	NA	7	10503601	10538934
ENSMUSG00000078802	0	0	0	0	0	0	NA	NA	7	10561594	10577488
ENSMUSG00000061026	0	0	0	0	0	0	NA	NA	7	10622584	10638527
ENSMUSG00000058685	0	0	0	0	0	0	NA	vomeronasal 2, receptor 51	7	10672547	10691008
ENSMUSG00000091930	0	0	0	0	0	0	NA	vomeronasal 2, receptor 52	7	10744001	10761635
ENSMUSG00000043066	0	0	0	0	0	0	NA	vomeronasal 1 receptor 66	7	10859177	10860700
ENSMUSG00000034122	0	0	0.538156	0	0.31524	0	NA	NLR family, pyrin domain containing 4D	7	10944250	10974284
ENSMUSG00000046716	0	0	0	0	0	0	NA	vomeronasal 1 receptor 67	7	11032138	11033136
ENSMUSG00000030393	1291.09	984.375	832.37	486.139	278.317	301.125	NA	zinc finger protein interacting with K protein 1	7	11072578	11080743
ENSMUSG00000047031	0	0	0	0	0	0	NA	vomeronasal 1 receptor 68	7	11112559	11113518
ENSMUSG00000091662	0	0	0	0	0	0	NA	vomeronasal 1 receptor 69	7	11165105	11198925
ENSMUSG00000045340	0	0	0	0	0	0	NA	vomeronasal 1 receptor 70	7	11218936	11219832
ENSMUSG00000091026	4.82882	2.48719	3.23684	3.27738	1.85778	2.64597	NA	NA	7	11241631	11242323
ENSMUSG00000034087	0	0	0	0	0	0	NA	NLR family, pyrin domain containing 4B	7	11273142	11315517
ENSMUSG00000059206	0	0	0	0	0	0	NA	vomeronasal 1 receptor 71	7	11332851	11334887
ENSMUSG00000091643	0	0	0	0	0	0	NA	NA	7	11486098	11490399
ENSMUSG00000078801	0	0	0	0	0	0	NA	NA	7	11494168	11494649
ENSMUSG00000054272	0	0	0	0	0	0	NA	zinc finger and SCAN domain containing 4C	7	11591071	11595896
ENSMUSG00000090714	0	0	0	0	0	0	NA	zinc finger and SCAN domain containing 4D	7	11746992	11751497
ENSMUSG00000091880	0	0	0	0	0	0	NA	NA	7	11891727	11896031
ENSMUSG00000070828	0	0	0	0	0	0	NA	zinc finger and SCAN domain containing 4F	7	11983264	11988090
ENSMUSG00000070826	0	0	0	0	0	0	NA	NA	7	12099659	12104460
ENSMUSG00000070824	0	0	0	0	0	0	NA	NA	7	12254948	12255868
ENSMUSG00000051687	0	0	0	0	0	0	NA	vomeronasal 1 receptor 73	7	12341606	12342517
ENSMUSG00000047655	0	0	0	0	0	0	NA	vomeronasal 1 receptor 74	7	12432124	12433038
ENSMUSG00000043308	0	0	0	0	0	0	NA	vomeronasal 1 receptor 75	7	12465692	12466609
ENSMUSG00000045713	0	0	0	0	0	0	NA	vomeronasal 1 receptor 76	7	12515660	12516634
ENSMUSG00000091201	0	0	0	0	0	0	NA	NA	7	12626648	12627568
ENSMUSG00000061602	0	0	0	0	0	0	NA	vomeronasal 1 receptor 78	7	12737813	12738754
ENSMUSG00000046443	0	0	0	0	0	0	NA	NA	7	12761542	12762462
ENSMUSG00000057161	0	0	0	0	0	0	NA	vomeronasal 1 receptor 80	7	12778314	12779240
ENSMUSG00000066805	0	0	0	0	0	0	NA	NA	7	12845108	12846028
ENSMUSG00000058132	0	0	0	0	0	0	NA	vomeronasal 1 receptor 82	7	12890154	12891068
ENSMUSG00000066804	0	0	0	0	0	0	NA	vomeronasal 1 receptor 83	7	12906529	12907524
ENSMUSG00000066803	0	0	0	0	0	0	NA	vomeronasal 1 receptor 84	7	12947157	12948113
ENSMUSG00000034071	177.908	198.251	183.426	128.772	111.402	113.323	NA	zinc fingr protein 551	7	13000502	13008100
ENSMUSG00000030386	1549.95	1183.13	1105.39	743.606	606.833	525.545	NA	zinc finger protein 606	7	13063642	13081584
ENSMUSG00000030385	0	0	0	0	0	0	NA	RIKEN cDNA 2900092C05 gene	7	13097866	13141672
ENSMUSG00000091797	0	0	0	0	0.31524	0	NA	NA	7	13166819	13191893
ENSMUSG00000053088	0	0	0.449781	0	0	0	NA	NA	7	13200582	13221483
ENSMUSG00000091045	0.442714	2.02432	0	0	0	1.76398	NA	vomeronasal 2, receptor 55	7	13237055	13270340
ENSMUSG00000090762	0	0	0.987937	0	0.31524	0	NA	vomeronasal 2, receptor 56	7	13279347	13318454
ENSMUSG00000070822	371.267	482.352	561.204	453.769	242.059	285.158	NA	zinc finger and SCAN domain containing 18	7	13353441	13361007
ENSMUSG00000057894	1430.79	1226.31	1029.56	858.767	782.473	727.531	NA	zinc finger protein 329	7	13390326	13404207
ENSMUSG00000058638	545.88	499.966	427.984	392.014	376.305	376.754	NA	zinc finger protein 110	7	13420110	13435926
ENSMUSG00000060397	270.539	266.372	256.405	188.132	167.25	150.07	NA	zinc finger protein 128	7	13466526	13478771
ENSMUSG00000054715	79.032	55.4653	60.7456	45.7513	37.8942	47.6719	NA	zinc finger and SCAN domain containing 22	7	13483164	13494432
ENSMUSG00000012848	4515.89	4713.94	4221.78	3286.72	2037.59	2366.65	NA	ribosomal protein S5	7	13507639	13512035
ENSMUSG00000033967	15.292	24.2074	18.8671	18.7785	18.4645	11.681	NA	RIKEN cDNA 2310014L17 gene	7	13512765	13516421
ENSMUSG00000004500	520.407	519.975	524.184	454.224	284.62	290.797	NA	zinc finger protein 324	7	13551187	13559585
ENSMUSG00000033961	100.444	104.773	124.311	84.6875	91.8444	75.0563	NA	zinc finger protein 446	7	13563197	13569689
ENSMUSG00000030382	5.83519	4.89948	6.19275	3.52865	3.02488	5.03411	NA	solute carrier family 27 (fatty acid transporter), member 5	7	13573695	13583541
ENSMUSG00000049600	187.039	182.562	192.157	155.13	120.536	127.115	NA	zinc finger and BTB domain containing 45	7	13590285	13595171
ENSMUSG00000005566	3761.81	3257.69	3133.68	2449.83	1730.5	1568.14	NA	tripartite motif-containing 28	7	13609501	13616384
ENSMUSG00000033916	534.887	562.407	587.049	600.35	803.566	799.581	NA	charged multivesicular body protein 2A	7	13617355	13620126
ENSMUSG00000005575	758.354	806.45	867.89	849.528	1053.78	964.08	NA	ubiquitin-conjugating enzyme E2M	7	13620587	13623622
ENSMUSG00000030380	43.3406	66.3629	87.6454	77.9844	66.6129	75.7852	NA	myeloid zinc finger 1	7	13627652	13640113
ENSMUSG00000070817	0	1.3137	0.987937	0	0	0	NA	vomeronasal 1 receptor 85	7	13669638	13670564
ENSMUSG00000070816	0	0	0	0	0	0	NA	vomeronasal 1 receptor 86	7	13687346	13688296
ENSMUSG00000070815	0	0	0	0	0	0	NA	vomeronasal 1 receptor 87	7	13716820	13717707
ENSMUSG00000090814	0	0	0	0	0	0	NA	NA	7	13763068	13764018
ENSMUSG00000050453	0	0	0	0	0	0	NA	NA	7	13804688	13805638
ENSMUSG00000070814	393.722	306.564	259.473	212.465	193.656	187.152	NA	RIKEN cDNA 6330408A02 gene	7	13844316	13864070
ENSMUSG00000056394	519.47	329.464	350.836	392	69.8255	78.1112	NA	ligase I, DNA, ATP-dependent	7	13862632	13896782
ENSMUSG00000033847	21.3691	20.3412	12.1283	8.94815	3.43398	5.07677	NA	phospholipase A2, group IVC (cytosolic, calcium-independent)	7	13910004	13946021
ENSMUSG00000005649	0	1.56146	3.23684	0.37781	0.945719	0.666825	NA	calcium binding protein 5	7	13983481	13994236
ENSMUSG00000074378	0	0	0	0	0.409102	0	NA	binder of sperm protein homolog 1	7	14036190	14058798
ENSMUSG00000078800	0	0	0	0	0	0	NA	binder of sperm protein homolog 2	7	14140212	14156413
ENSMUSG00000078799	0	0	0	0	0.31524	0	NA	sulfotransferase family 2A, dehydroepiandrosterone (DHEA)-preferring, member 5	7	14209341	14256150
ENSMUSG00000070811	0	0	0	0	0	0	NA	sulfotransferase family 2A, dehydroepiandrosterone (DHEA)-preferring, member 2	7	14318855	14364985
ENSMUSG00000078798	0	0	0	0.75562	0.945719	0	NA	sulfotransferase family 2A, dehydroepiandrosterone (DHEA)-preferring, member 1	7	14381601	14422759
ENSMUSG00000074377	0	0	0	0	0	0	NA	sulfotransferase family 2A, dehydroepiandrosterone (DHEA)-preferring, member 4	7	14495026	14574974
ENSMUSG00000074375	0	0	0	0	0	0	NA	sulfotransferase family 2A, dehydroepiandrosterone (DHEA)-preferring, member 3	7	14652801	14708393
ENSMUSG00000070810	0	0	0	0	0	0	NA	sulfotransferase family 2A, dehydroepiandrosterone (DHEA)-preferring, member 6	7	14807730	14840216
ENSMUSG00000030378	1.77086	3.01537	2.15262	0.37781	1.89144	1.93648	NA	RIKEN cDNA 2810007J24 gene	7	14996036	15032118
ENSMUSG00000041596	375.346	462.493	415.344	295.77	159.835	183.55	NA	NA	7	15116003	15208415
ENSMUSG00000055942	0	0.603073	0	0	0	0	NA	predicted gene 4745	7	15245057	15251344
ENSMUSG00000074369	0	0	0	0	0	0	NA	oocyte specific homeobox 2	7	15939386	15983894
ENSMUSG00000066772	1.52898	1.20615	0.538156	0	0	0	NA	oocyte specific homeobox 3	7	16065174	16225251
ENSMUSG00000054310	0	0	0	0	0	0	NA	oocyte specific homeobox 1	7	16097689	16142215
ENSMUSG00000074366	0	0	0	0	0	0.45166	NA	oocyte specific homeobox 5	7	16335483	16345149
ENSMUSG00000041583	0	0	0	0	0	0	NA	oocyte specific homeobox 6	7	16418595	16425027
ENSMUSG00000041578	1.77086	8.05505	7.82303	2.3934	2.17302	0.881989	NA	cone-rod homeobox containing gene	7	16451296	16465317
ENSMUSG00000074365	0.764492	1.66901	0	0.882161	2.36075	1.78531	NA	Crx opposite strand transcript 1	7	16467966	16489379
ENSMUSG00000041571	808.562	1142.17	1141.71	1242.11	1017.46	1205.66	NA	selenoprotein W, muscle 1	7	16502557	16507751
ENSMUSG00000041560	708.645	613.777	712.331	599.371	543.57	593.965	NA	glioma tumor suppressor candidate region gene 2	7	16523187	16531457
ENSMUSG00000074364	96.8227	75.1055	46.9791	83.8144	56.7271	69.2913	NA	EH-domain containing 2	7	16532326	16552916
ENSMUSG00000070808	224.139	191.32	221.857	122.131	44.4399	60.5994	NA	glioma tumor suppressor candidate region gene 1	7	16556611	16584844
ENSMUSG00000078796	2.41441	3.58578	5.83134	9.19942	3.34012	4.45261	NA	zinc finger protein 541	7	16657291	16681677
ENSMUSG00000006024	588.078	696.368	750.758	852.122	1459.27	1564.54	NA	N-ethylmaleimide sensitive fusion protein attachment protein alpha	7	16683807	16703324
ENSMUSG00000006021	155.291	198.975	179.885	186.844	207.551	215.465	NA	kaptin	7	16705244	16712865
ENSMUSG00000030376	451.154	620.957	808.036	1241.85	2199.66	2280.74	NA	solute carrier family 8 (sodium/calcium exchanger), member 2	7	16715509	16745858
ENSMUSG00000041420	406.839	375.806	412.145	288.55	199.451	202.258	NA	Meis homeobox 3	7	16760439	16771859
ENSMUSG00000006019	208.974	175.736	178.736	145.92	125.655	133.397	NA	DEAH (Asp-Glu-Ala-His) box polypeptide 34	7	16782496	16807386
ENSMUSG00000074361	2.41441	4.93214	1.43772	4.91516	10.2081	6.34643	NA	G protein-coupled receptor 77	7	16819934	16829503
ENSMUSG00000049130	2.85713	3.47823	1.8875	2.64648	4.43991	3.97962	NA	complement component 5a receptor 1	7	16832092	16844889
ENSMUSG00000091811	118.516	154.965	173.154	185.718	152.905	162.93	NA	proline rich 24	7	16857363	16859041
ENSMUSG00000041375	294.405	248.55	281.657	281.384	216.197	222.407	NA	coiled-coil domain containing 9	7	16859391	16872144
ENSMUSG00000002083	116.823	192.159	204.262	197.302	67.9217	49.3933	NA	BCL2 binding component 3	7	16894965	16903554
ENSMUSG00000052833	1168.09	1028.28	981.34	1118.12	941.927	992.851	NA	SUMO1 activating enzyme subunit 1	7	16905583	16973146
ENSMUSG00000059273	1073.91	899.806	891.811	750.369	416.332	443.914	NA	zinc finger CCCH-type containing 4	7	16986230	17023043
ENSMUSG00000019158	92.1148	135.436	137.613	196.414	276.043	284.218	NA	transmembrane protein 160	7	17038128	17040838
ENSMUSG00000001988	18.4709	66.3955	66.3197	91.3506	32.3474	31.4938	NA	neuronal PAS domain protein 1	7	17041070	17062129
ENSMUSG00000058230	4337.16	4512.51	4705.01	4429.87	3802.24	3885.42	NA	glucocorticoid receptor DNA binding factor 1	7	17079822	17200342
ENSMUSG00000078795	0	0.710625	0	0	0.724341	0.215165	NA	carcinoembryonic antigen-related cell adhesion molecule 15	7	17256680	17261054
ENSMUSG00000007209	0	0	0	0	1.44868	0.215165	NA	carcinoembryonic antigen-related cell adhesion molecule 9	7	17307278	17311459
ENSMUSG00000008036	743.701	968.54	1031.98	1095.48	987.527	920.356	NA	adaptor-related protein complex 2, sigma 1 subunit	7	17323759	17334643
ENSMUSG00000001918	92.916	83.0434	51.1155	74.4775	30.4223	24.589	NA	solute carrier family 1 (neutral amino acid transporter), member 5	7	17366695	17383623
ENSMUSG00000048920	293.364	318.975	394.678	368.085	445.782	457.617	NA	fukutin related protein	7	17394619	17400478
ENSMUSG00000030374	2100.34	2328.21	2439.63	2142.33	3044.44	2815.22	NA	striatin, calmodulin binding protein 4	7	17401238	17426280
ENSMUSG00000041187	47.6879	41.8655	48.6978	48.7738	22.4209	37.0649	NA	protein kinase D2	7	17428283	17455810
ENSMUSG00000078794	333.491	536.846	639.503	871.13	1624.4	1841.82	NA	dapper homolog 3, antagonist of beta-catenin (xenopus)	7	17460666	17472650
ENSMUSG00000063594	3.74255	3.94109	6.46578	3.27556	3.52784	5.54976	NA	guanine nucleotide binding protein (G protein), gamma 8	7	17477135	17480784
ENSMUSG00000043017	1.77086	1.66901	1.43772	1.38651	2.70964	2.00047	NA	prostaglandin I receptor (IP)	7	17491839	17496254
ENSMUSG00000019370	9227.82	14004.5	14635.4	20450.9	27300.1	23020.1	NA	calmodulin 1	7	17500728	17509463
ENSMUSG00000070802	1784.35	1983.58	2361.79	2217.6	2051.9	2038.56	NA	PNMA-like 2	7	17530031	17532427
ENSMUSG00000041141	538.476	709.787	700.569	677.38	1188.71	1267.78	NA	PNMA-like 1	7	17545144	17547668
ENSMUSG00000041117	242.862	169.901	125.982	141.025	62.0791	76.3027	NA	coiled-coil domain containing 8	7	17578057	17582864
ENSMUSG00000003099	410.305	443.183	527.775	595.282	786.091	847.7	NA	protein phosphatase 5, catalytic subunit	7	17589989	17613273
ENSMUSG00000004328	81.1268	76.2559	53.1956	22.5548	16.4048	10.863	NA	hypoxia inducible factor 3, alpha subunit	7	17616856	17647776
ENSMUSG00000066760	440.44	449.421	447.67	403.641	392.227	416.621	NA	pregnancy specific glycoprotein 16	7	17659389	17718799
ENSMUSG00000053228	0.764492	0.958386	2.06425	2.01741	0.31524	2.6673	NA	carcinoembryonic antigen-related cell adhesion molecule 3	7	17735631	17749602
ENSMUSG00000023159	1.32814	2.6274	1.52609	2.14213	3.08509	1.52748	NA	pregnancy-specific glycoprotein 29	7	17788826	17801105
ENSMUSG00000090442	0	0	0	0	0	0	NA	NA	7	18257662	18267409
ENSMUSG00000008789	0.442714	0	0	0	0	0	NA	carcinoembryonic antigen-related cell adhesion molecule 5	7	18298601	18346475
ENSMUSG00000023185	1.20721	0	0	0	0	0	NA	carcinoembryonic antigen-related cell adhesion molecule 14	7	18397982	18401012
ENSMUSG00000078793	0.764492	0	0	0	0	0	NA	predicted gene 5155	7	18457116	18504373
ENSMUSG00000030368	1.9717	0.603073	0	0	0	0	NA	carcinoembryonic antigen-related cell adhesion molecule 11	7	18557473	18563905
ENSMUSG00000057195	0.442714	0	0	0	0	0	NA	carcinoembryonic antigen-related cell adhesion molecule 13	7	18595238	18604570
ENSMUSG00000030366	0	0	0	0	0	0	NA	carcinoembryonic antigen-related cell adhesion molecule 12	7	18651278	18663335
ENSMUSG00000066756	0	0	0	0	0	0	NA	IGF-like family member 3	7	18761843	18767211
ENSMUSG00000054005	0	0	0	0	0	0	NA	MHC I like leukocyte 1	7	18830696	18851441
ENSMUSG00000003505	0	0	0	0	0	0	NA	pregnancy specific glycoprotein 18	7	18931157	18940356
ENSMUSG00000030373	2.41441	2.27208	1.8875	2.64648	1.85778	2.64597	NA	pregnancy-specific glycoprotein 28	7	19007887	19017404
ENSMUSG00000070799	0.442714	0.355313	0	0	0	0	NA	pregnancy-specific glycoprotein 26	7	19059932	19069498
ENSMUSG00000070798	0	0	0	0	0	0	NA	pregnancy-specific glycoprotein 25	7	19105053	19117576
ENSMUSG00000070797	1.20721	0	0	0	0	0	NA	pregnancy-specific glycoprotein 27	7	19141864	19152654
ENSMUSG00000074359	6.72062	11.9635	13.9195	11.8441	17.3169	17.0156	NA	pregnancy-specific glycoprotein 23	7	19191692	19201850
ENSMUSG00000070796	1.9717	0	0	0	0	0	NA	pregnancy-specific glycoprotein 21	7	19232003	19242074
ENSMUSG00000063305	0	0.603073	0	0	0	0	NA	pregnancy-specific glycoprotein 20	7	19259456	19271534
ENSMUSG00000044903	0	0	0	0	0	0	NA	pregnancy-specific glycoprotein 22	7	19303439	19312597
ENSMUSG00000004542	0	0	0.538156	0	0	0	NA	pregnancy specific glycoprotein 19	7	19374474	19383859
ENSMUSG00000004540	0.442714	1.3137	0.987937	0.882161	0	0.45166	NA	pregnancy specific glycoprotein 17	7	19399286	19406956
ENSMUSG00000040987	4.50705	8.84057	8.97981	6.67767	14.5205	14.3057	NA	MHC I like leukocyte 2	7	19425315	19444003
ENSMUSG00000030413	12.6357	19.9532	16.6103	28.3539	27.9677	24.8895	NA	peptidoglycan recognition protein 1	7	19470039	19475787
ENSMUSG00000074358	95.3326	119.257	108.938	131.059	69.7989	70.6658	NA	coiled-coil domain containing 61	7	19476232	19495764
ENSMUSG00000030411	872.127	878.493	1164.42	683.079	223.729	286.435	NA	neuro-oncological ventral antigen 2	7	19510698	19551031
ENSMUSG00000051965	3.62162	3.19781	5.57412	1.76432	1.13344	0.881989	NA	nanos homolog 2 (Drosophila)	7	19572873	19574311
ENSMUSG00000074355	6.39884	5.64276	6.46578	7.81109	19.0206	17.9189	NA	NA	7	19574903	19578123
ENSMUSG00000048481	58.6715	67.0408	78.3438	99.8053	133.32	144.326	NA	Myb-related transcription factor, partner of profilin	7	19576594	19587115
ENSMUSG00000044030	570.628	591.522	600.819	466.114	412.159	414.273	NA	interferon regulatory factor 2 binding protein 1	7	19589414	19592110
ENSMUSG00000040891	1.32814	0	0.987937	0	0.31524	0	NA	forkhead box A3	7	19598631	19608887
ENSMUSG00000023118	1161.25	1069.43	1069.7	1098.21	1292.04	1337.52	NA	symplekin	7	19609726	19639967
ENSMUSG00000040866	2.09263	5.25479	4.04012	5.0417	4.47356	3.09763	NA	radial spoke head 6 homolog A (Chlamydomonas)	7	19640039	19659796
ENSMUSG00000030410	515.933	600.871	735.27	670.001	422.872	472.705	NA	dystrophia myotonica-containing WD repeat motif	7	19661598	19668125
ENSMUSG00000030409	105.07	116.606	104.392	90.0907	69.9601	89.1449	NA	dystrophia myotonica-protein kinase	7	19669198	19679170
ENSMUSG00000040841	50.9467	28.0179	21.3653	27.6037	15.5601	16.2635	NA	sine oculis-related homeobox 5	7	19679943	19683898
ENSMUSG00000085601	21.0862	60.3226	76.7214	42.5914	1.26096	1.74265	NA	NA	7	19686900	19703717
ENSMUSG00000050428	227.169	236.18	211.265	186.854	134.554	148.645	NA	F-box protein 46	7	19705208	19723610
ENSMUSG00000030407	87.5257	112.342	149.532	138.234	87.9145	94.972	NA	glutaminyl-peptide cyclotransferase-like	7	19725566	19734545
ENSMUSG00000040824	687.734	829.668	648.931	683.535	562.642	543.896	NA	small nuclear ribonucleoprotein D2	7	19735071	19738084
ENSMUSG00000030406	71.7499	150.042	109.708	53.0254	5.07039	6.77676	NA	gastric inhibitory polypeptide receptor	7	19742474	19751476
ENSMUSG00000040811	391.681	625.491	826.067	1514.48	2437.59	1955.5	NA	echinoderm microtubule associated protein like 2	7	19761770	19791831
ENSMUSG00000044317	10.3422	7.03136	11.2366	9.19942	12.7229	8.97106	NA	G protein-coupled receptor 4	7	19797887	19809525
ENSMUSG00000052214	355.368	351.576	338.138	442.321	368.029	414.554	NA	optic atrophy 3	7	19813683	19841892
ENSMUSG00000030403	389.74	382.659	344.983	364.047	181.321	159.384	NA	vasodilator-stimulated phosphoprotein	7	19842278	19857166
ENSMUSG00000030402	3.29984	3.47823	4.93968	4.15954	1.5762	1.52748	NA	protein phosphatase, Mg2+/Mn2+ dependent, 1N (putative)	7	19862156	19865398
ENSMUSG00000030401	492.153	585.095	655.859	660.755	482.897	541.954	NA	reticulon 2 (Z-band associated protein)	7	19868011	19881513
ENSMUSG00000003545	0.764492	1.3137	1.61447	2.89775	27.7198	34.6554	NA	FBJ osteosarcoma oncogene B	7	19888070	19895394
ENSMUSG00000003549	149.821	185.255	189.242	150.323	115.714	124.234	NA	excision repair cross-complementing rodent repair deficiency, complementation group 1	7	19930127	19941873
ENSMUSG00000047649	117.948	130.014	132.784	145.287	127.296	115.171	NA	CD3E antigen, epsilon polypeptide associated protein	7	19942198	19944832
ENSMUSG00000040734	16.7799	17.4334	15.5577	7.18383	5.70087	8.3469	NA	protein phosphatase 1, regulatory (inhibitor) subunit 13 like	7	19945098	19963882
[truncated: 19,414 more rows]
