# Supplementary material for: High-resolution mapping of transcriptional dynamics across tissue development reveals a stable mRNA–tRNA interface
Source: HighWire-hosted journal article supplement (doi:10.1101/gr.176784.114), 2014-08-13
Supplement: SUPP_table_8_DE_tRNA_genes_Liver_140219.xlsx [file SUPP_table_8_DE_tRNA_genes_Liver_140219.xlsx]

## Sheet: Sheet1
E15.5 - E18.5	E15.5 - P0.5	E15.5 - P4	E15.5 - P22	E15.5 - P29	E18.5 - P0.5	E18.5 - P4	E18.5 - P22	E18.5 - P29	P0.5 - P4	P0.5 - P22	P0.5 - P29	P4 - P22	P4 - P29	P22 - P29
-	chr13.trna980	chr13.trna73	chr13.trna951	chr13.trna951	-	chr17.trna516	chr13.trna82	chr13.trna74	-	chr8.trna783	chr8.trna783	chr13.trna82	chr13.trna82	chr11.trna400
		chr17.trna995	chr13.trna84	chr13.trna84		chr17.trna84	chr13.trna951	chr8.trna783		chr13.trna951	chr6.trna157	chr13.trna84	chr13.trna84	chr13.trna87
		chr1.trna1392	chr13.trna82	chr13.trna73		chr13.trna73	chr8.trna783	chr13.trna73		chr13.trna84	chr13.trna951	chr13.trna951	chr13.trna951	chr2.trna1947
		chr17.trna84	chr3.trna292	chr13.trna74		chr13.trna74	chr3.trna292	chr13.trna82		chr13.trna74	chr13.trna73	chr13.trna94	chr1.trna1000	chr3.trna28
			chr13.trna983	chr13.trna82		chr13.trna956	chr13.trna73	chr13.trna951			chr13.trna74	chr13.trna983	chr8.trna783	chr10.trna1316
			chr13.trna73	chr3.trna292		chr3.trna92	chr13.trna74	chr3.trna92			chr13.trna87	chr13.trna83	chr13.trna94	chr13.trna86
			chr3.trna752	chr13.trna983		chr13.trna109	chr13.trna84	chr13.trna72			chr14.trna359	chr13.trna987	chr13.trna987	chr11.trna1234
			chr8.trna783	chr8.trna783		chr7.trna156	chr3.trna92	chr3.trna292			chr17.trna995	chr3.trna752	chr13.trna983	chr7.trna1213
			chr13.trna88	chr13.trna72		chr13.trna991	chr13.trna983	chr13.trna84			chr13.trna84	chr13.trna963	chr1.trna1001	chr1.trna1000
			chr13.trna987	chr6.trna157			chr3.trna93	chr3.trna93			chr13.trna67	chr8.trna783	chr13.trna963	chr3.trna29
			chr13.trna69	chr3.trna749			chr3.trna752	chr2.trna1431			chr5.trna702	chr3.trna754	chr13.trna83	chr7.trna86
			chr3.trna749	chr13.trna987			chr13.trna109	chr11.trna1446				chr3.trna751	chr13.trna966	chr10.trna857
			chr13.trna74	chr3.trna752			chr17.trna516	chr13.trna958				chr13.trna966	chr13.trna74	chr14.trna359
			chr13.trna960	chr1.trna1000			chr13.trna69	chr13.trna983				chr13.trna69	chr13.trna69	chr1.trna1547
			chr13.trna985	chr13.trna959			chr13.trna959	chr14.trna209				chr13.trna99	chr3.trna286	chr14.trna457
			chr13.trna83	chr3.trna293			chr11.trna1880	chr11.trna1821				chr1.trna1000	chr13.trna93	chr19.trna109
			chr13.trna950	chr3.trna92			chr11.trna398	chr13.trna109				chr3.trna286	chr3.trna754	chr3.trna753
			chr3.trna754	chr13.trna69			chr11.trna1446	chr13.trna959				chr13.trna968	chr1.trna704
			chr13.trna963	chr3.trna286			chr11.trna550	chr11.trna1880				chr3.trna284	chr3.trna752
			chr13.trna959	chr13.trna963			chr3.trna747	chr10.trna1095				chr13.trna98	chr3.trna293
			chr3.trna93	chr3.trna93			chr11.trna1820	chr13.trna69				chr13.trna985	chr13.trna100
			chr3.trna286	chr3.trna754			chr7.trna156	chr13.trna987				chr13.trna991	chr17.trna995
			chr3.trna297	chr11.trna1880			chr13.trna72	chr3.trna747				chr3.trna295	chr11.trna1234
			chr3.trna293	chr19.trna108			chr3.trna749	chr1.trna1000				chr13.trna96	chr3.trna749
			chr3.trna289	chr17.trna83			chr13.trna987	chr3.trna749				chr3.trna756	chr13.trna72
			chr3.trna756	chr13.trna88			chr10.trna1095	chr6.trna157				chr13.trna950	chr3.trna287
			chr3.trna92	chr11.trna1446			chr10.trna857	chr3.trna293				chr13.trna93	chr1.trna999
			chr11.trna1880	chr13.trna981			chr13.trna960	chr9.trna783				chr3.trna287	chr13.trna969
			chr17.trna83	chr13.trna83			chr13.trna91	chr11.trna398				chr1.trna704	chr13.trna73
			chr13.trna968	chr13.trna950			chr13.trna985	chr3.trna752				chr3.trna289	chr13.trna99
			chr3.trna295	chr13.trna100			chr13.trna83	chr13.trna100				chr13.trna100	chr2.trna586
			chr13.trna100	chr11.trna1821			chr13.trna963	chr17.trna516				chr3.trna755	chr3.trna755
			chr13.trna981	chr13.trna960			chr13.trna100	chr11.trna550				chr3.trna293	chr3.trna751
			chr19.trna108	chr3.trna757			chr13.trna68	chr17.trna83				chr3.trna749	chr3.trna284
			chr6.trna157	chr6.trna46			chr13.trna950	chr17.trna84				chr13.trna984	chr13.trna95
			chr13.trna68	chr13.trna63			chr2.trna1947	chr17.trna1000				chr3.trna297	chr13.trna85
			chr11.trna550	chr13.trna965			chr3.trna297	chr13.trna961				chr3.trna753	chr13.trna965
			chr3.trna751	chr13.trna958			chr7.trna1213	chr9.trna342				chr13.trna95	chr3.trna756
			chr3.trna757	chr13.trna961			chr3.trna293					chr13.trna68	chr1.trna1392
			chr13.trna94	chr13.trna103			chr13.trna968					chr13.trna88	chr13.trna98
			chr11.trna1442	chr3.trna747			chr8.trna1008					chr3.trna292	chr3.trna295
			chr13.trna72	chr13.trna969			chr17.trna83					chr1.trna706	chr13.trna96
			chr11.trna1446	chr14.trna209			chr9.trna783					chr13.trna996	chr5.trna1314
			chr13.trna961	chr13.trna85			chr13.trna966					chr13.trna969	chr11.trna401
			chr13.trna980	chr13.trna93			chr3.trna756					chr1.trna1001	chr13.trna950
			chr10.trna857	chr13.trna94								chr13.trna975	chr3.trna92
			chr14.trna457	chr13.trna994								chr13.trna71	chr11.trna1821
			chr1.trna704	chr14.trna703								chr13.trna85	chr11.trna400
			chr3.trna747	chr10.trna1095								chr13.trna976	chr1.trna701
			chr13.trna984	chr19.trna711								chr13.trna965	chr13.trna968
			chr13.trna996	chr11.trna401								chr13.trna982	chr14.trna209
			chr13.trna85	chr7.trna977								chr13.trna74	chr11.trna1022
			chr13.trna99	chr4.trna1697								chr13.trna962	chr11.trna397
			chr1.trna1000	chr13.trna109								chr3.trna757	chr1.trna997
			chr13.trna91	chr11.trna1493								chr13.trna97	chr2.trna1431
			chr3.trna287	chr1.trna997								chr3.trna93	chr14.trna359
			chr3.trna755	chr11.trna394								chr17.trna995
			chr1.trna706	chr3.trna289
			chr13.trna982	chr3.trna297
			chr3.trna284	chr17.trna84
			chr6.trna46	chr13.trna966
			chr13.trna108	chr11.trna550
			chr7.trna977	chr11.trna398
			chr13.trna965	chr11.trna399
			chr7.trna86	chr3.trna756
			chr13.trna63	chr1.trna701
			chr11.trna398	chr1.trna999
			chr13.trna966	chr13.trna102
			chr13.trna98	chr1.trna704
			chr13.trna93	chr13.trna948
			chr13.trna109	chr13.trna962
			chr14.trna703	chr13.trna982
			chr17.trna1000	chr13.trna67
			chr13.trna95	chr17.trna1000
			chr4.trna1697	chr13.trna995
			chr13.trna962	chr11.trna1818
			chr11.trna1817	chr3.trna287
			chr11.trna400	chr11.trna1442
			chr7.trna337	chr3.trna755
			chr7.trna1213	chr13.trna997
			chr13.trna994	chr13.trna971
			chr11.trna1493	chr13.trna108
			chr11.trna1818	chr11.trna1023
			chr13.trna995	chr13.trna985
			chr1.trna1004	chr11.trna791
			chr2.trna263
			chr13.trna969
			chr11.trna1820
			chr3.trna753
			chr7.trna441
			chr3.trna628
			chr10.trna1095
