# Supplementary material for: High-resolution mapping of transcriptional dynamics across tissue development reveals a stable mRNA–tRNA interface
Source: HighWire-hosted journal article supplement (doi:10.1101/gr.176784.114), 2014-08-13
Supplement: SUPP_table_9_DE_tRNA_genes_brain_140219.xlsx [file SUPP_table_9_DE_tRNA_genes_brain_140219.xlsx]

## Sheet: Sheet1
E15.5 - E18.5	E15.5 - P0.5	E15.5 - P4	E15.5 - P22	E15.5 - P29	E18.5 - P0.5	E18.5 - P4	E18.5 - P22	E18.5 - P29	P0.5 - P4	P0.5 - P22	P0.5 - P29	P4 - P22	P4 - P29	P22 - P29
-	-	chr4.trna1697	chr13.trna987	chr13.trna987	-	-	chr13.trna987	chr13.trna987	-	chr13.trna990	chr1.trna1000	chr12.trna470	chr12.trna470	-
		chr13.trna69	chr12.trna470	chr1.trna1006			chr13.trna978	chr1.trna1000		chr13.trna978	chr13.trna978	chr13.trna978	chr13.trna966
		chr13.trna966	chr13.trna978	chr1.trna1000			chr12.trna470	chr1.trna1006		chr12.trna470	chr13.trna990	chr13.trna990	chr3.trna293
			chr13.trna990	chr12.trna470			chr13.trna990	chr6.trna157		chr3.trna628	chr12.trna470	chr13.trna82	chr13.trna82
			chr13.trna958	chr6.trna157			chr19.trna8	chr3.trna298		chr19.trna8	chr13.trna987	chr3.trna628	chr13.trna84
			chr1.trna1000	chr17.trna995			chr13.trna97	chr13.trna84			chr13.trna94	chr11.trna2021	chr13.trna978
			chr11.trna1234	chr13.trna947			chr1.trna1000	chr13.trna978			chr13.trna963	chr11.trna1022	chr17.trna83
			chr7.trna559	chr3.trna298			chr11.trna1022	chr13.trna97			chr11.trna1446	chr13.trna84	chr4.trna1697
			chr6.trna157	chr13.trna978			chr6.trna157	chr12.trna470			chr6.trna157	chr13.trna958	chr3.trna283
			chr8.trna783	chr11.trna791			chr3.trna628	chr11.trna1442			chrX.trna375	chr3.trna293	chr13.trna987
			chr3.trna628	chr1.trna708			chr13.trna958	chr13.trna969				chr4.trna1697	chr13.trna98
			chr13.trna948	chr8.trna783			chr7.trna559	chr17.trna995				chr13.trna983	chr13.trna983
			chr11.trna204	chr13.trna86			chr13.trna84	chr11.trna791				chr13.trna960	chr3.trna289
				chr14.trna359			chr13.trna976	chr13.trna94				chr13.trna951	chr11.trna2021
				chr13.trna969			chr13.trna71	chr3.trna293					chr13.trna951
				chr11.trna1849			chr13.trna82	chr2.trna586					chr13.trna69
				chr11.trna1446				chr7.trna559					chr11.trna1442
				chr13.trna948				chr13.trna970					chr3.trna752
				chr3.trna749				chr2.trna1431					chr13.trna94
				chr13.trna988				chr7.trna86					chr11.trna1849
				chr11.trna1234				chr13.trna990					chr13.trna963
				chr13.trna97				chr1.trna701					chr13.trna990
				chr13.trna970				chr13.trna947					chr13.trna965
				chr19.trna107				chr13.trna950					chr13.trna99
				chr7.trna559				chr1.trna704					chr13.trna95
				chr13.trna990				chr11.trna1446					chr13.trna950
				chr1.trna730				chr13.trna82					chr13.trna960
				chr2.trna586				chr13.trna963					chr13.trna60
				chr13.trna75				chr11.trna1849					chr3.trna628
				chr1.trna1004				chr3.trna289					chr1.trna730
				chr10.trna851				chr5.trna109					chr7.trna559
				chr17.trna83				chr11.trna400					chr3.trna298
				chr19.trna109				chr13.trna1000					chr1.trna1000
				chr13.trna955				chr19.trna107					chr13.trna962
				chr13.trna1001				chr13.trna983					chr13.trna88
				chr11.trna1824				chr11.trna1816					chr13.trna984
				chr13.trna84				chr3.trna749
				chr5.trna702				chr1.trna1001
				chr13.trna989				chr13.trna105
				chr11.trna394				chr13.trna948
				chr14.trna705				chr3.trna283
				chr13.trna88				chr1.trna1004
				chr6.trna1025				chr11.trna394
				chr1.trna1001				chr11.trna1234
				chr5.trna109				chr17.trna83
				chr3.trna92				chr1.trna702
				chr11.trna1816				chr13.trna88
				chr14.trna190				chr14.trna359
				chr13.trna1000				chr11.trna2021
				chr13.trna950				chr6.trna1025
				chr14.trna347
				chr5.trna110
				chr19.trna637
				chr7.trna387
				chr13.trna64
				chr17.trna113
				chr11.trna208
				chr5.trna1314
				chr11.trna400
				chrX.trna375
				chr13.trna68
				chr1.trna707
				chr13.trna960
